# Supplementary material
Source: ML conference proceedings conference paper supplement (https://openreview.net/forum?id=krG6UHAvYr)
Supplement: supplementary_material [file Neurips_2025__MisoDICE_Analysis_LLM.pdf › Neurips_2025__MisoDICE_Analysis_LLM.pdf]

```
In [112... import os
import json
import math
import numpy as np
import pandas as pd
import plotly.io as pio
import plotly.express as px
import plotly.graph_objects as go
from collections import defaultdict
from plotly.subplots import make_subplots
pio.kaleido.scope.mathjax = None
pd.options.display.max_rows = None
```

```
In [113... ALGOS = ["bc_beta0.0", "bc_beta0.5", "bc_beta1.0", "omap1", "indd", "vdn", "miso-sl", "miso-mini", "miso_alpha0.00", "miso_alp
MAIN_ALGOS = ["bc_beta0.0", "bc_beta0.5", "bc_beta1.0", "omap1", "indd", "vdn", "miso-sl", "miso_alpha0.05"]
MAIN_ALGOS_2 = ["bc_beta0.0", "bc_beta0.5", "bc_beta1.0", "indd", "vdn", "miso-sl", "miso_alpha0.05"]
ABLATION_ALGOS = ["miso_alpha0.00", "miso_alpha0.05", "miso_alpha0.10", "miso_alpha0.50", "miso_alpha1.00", "miso_alpha10.00"]
SMACV1_ENV_NAMES = ["2c_vs_64zg", "5m_vs_6m", "6h_vs_8z", "corridor"]
SMACV2_ENV_NAMES = [f"{map_name}_{map_mode}" for map_name in ["protoss", "terran", "zerg"] for map_mode in ["5_vs_5", "10_vs_1
MAMUJOCO_ENV_NAMES = ["Hopper-v2", "Ant-v2", "HalfCheetah-v2"]
RENAME_ALGOS = {
    "bc_beta0.0": "BC ( $\beta=0.0$ )",
    "bc_beta0.5": "BC ( $\beta=0.5$ )",
    "bc_beta1.0": "BC ( $\beta=1.0$ )",
    "omap1": "OMAPL",
    "indd": "INDD",
    "vdn": "VDN",
    "miso-sl": "MARL-SL",
    "miso-mini": "MisoDICE (4o-mini)",
    "miso_alpha0.00": "MisoDICE ( $\alpha=0.00$ )",
    "miso_alpha0.05": "MisoDICE (ours)",
    "miso_alpha0.10": "MisoDICE ( $\alpha=0.10$ )",
    "miso_alpha0.50": "MisoDICE ( $\alpha=0.50$ )",
    "miso_alpha1.00": "MisoDICE ( $\alpha=1.00$ )",
    "miso_alpha10.00": "MisoDICE ( $\alpha=10.00$ )",
}
colors = px.colors.qualitative.Plotly
COLOR_MAPS = {
    "bc_beta0.0": colors[4],
    "bc_beta0.5": colors[9],
    "bc_beta1.0": colors[2],
    "omap1": colors[7],
    "indd": colors[3],
    "vdn": colors[0],
    "miso-sl": colors[8],
    "miso-mini": colors[0],
    "miso_alpha0.00": colors[5],
    "miso_alpha0.05": colors[1],
    "miso_alpha0.10": colors[6],
    "miso_alpha0.50": colors[7],
    "miso_alpha1.00": colors[8],
    "miso_alpha10.00": "#feb406",

    50: colors[0],
    200: colors[1],
    400: colors[2],
    800: colors[3],
    1200: colors[4],
}

LOG_DIR = "logs"
```

```
In [114... def darken_color(hex_color, factor=0.92):
    r = int(hex_color[1:3], 16)
    g = int(hex_color[3:5], 16)
    b = int(hex_color[5:7], 16)

    r = int(r * factor)
    g = int(g * factor)
    b = int(b * factor)

    r = max(0, min(r, 255))
    g = max(0, min(g, 255))
    b = max(0, min(b, 255))

    return "#{:02x}{:02x}{:02x}".format(r, g, b)
```

```
In [115... COLOR_MAPS = {k: darken_color(v) for k, v in COLOR_MAPS.items()}
```

```
In [116... def load_results(path):
    if not os.path.exists(path):
        return {}
    with open(path, "r") as f:
```

```
data = json.load(f)
return data
```

```
In [117... def smooth(scalars, weight=0.75):
    last = 0
    smoothed = []
    for num_acc, next_val in enumerate(scalars):
        last = last * weight + (1 - weight) * next_val
        smoothed.append(last / (1 - math.pow(weight, num_acc+1)))
    return smoothed
```

```
In [118... def load_data(use_llm=False, exsize=200, algos=None):
    data_returns = defaultdict(lambda: defaultdict(lambda: defaultdict(list)))
    data_winrates = defaultdict(lambda: defaultdict(lambda: defaultdict(list)))
    if not algos:
        algos = ALGOS
    for algo in algos:
        for env_name in MAMUJOCO_ENV_NAMES + SMACV1_ENV_NAMES + SMACV2_ENV_NAMES:
            for seed in range(4):
                if use_llm:
                    if env_name in MAMUJOCO_ENV_NAMES:
                        continue
                    path = f"{LOG_DIR}/{algo}/{env_name}_llm/seed{seed}/exsize{exsize}/results.json"
                else:
                    path = f"{LOG_DIR}/{algo}/{env_name}/seed{seed}/exsize{exsize}/results.json"

                if algo == "omap1":
                    path = f"{LOG_DIR}/{algo}/{env_name}_llm/seed{seed}/results.json"

                data = load_results(path)
                for step in range(101):
                    result = data[f"step_{step}"] if algo != "omap1" else data
                    if "returns" in result:
                        data_returns[algo][env_name][step].append(np.mean(result["returns"]))
                    if "winrates" in result:
                        data_winrates[algo][env_name][step].append(np.mean(result["winrates"]))
    return data_returns, data_winrates
```

```
In [119... def analyze_data(data, tag="returns"):
    if isinstance(data, float):
        return "NaN"
    items = [data[step] for step in sorted(data.keys())]
    items = np.array(items)
    items = [smooth(items[:, i]) for i in range(items.shape[-1])]
    items = np.array(items)
    items = items[:, -1]
    mean = np.mean(items)
    std = np.std(items)
    if tag == "returns":
        return f"{mean:.1f} ± {std:.1f}"
    elif tag == "winrates":
        return f"{100*mean:.1f} ± {100*std:.1f}"
    else:
        return items
```

```
In [120... data_returns_llm, data_winrates_llm = load_data(use_llm=True, algos=MAIN_ALGOS)
pd_returns_llm = pd.DataFrame.from_dict(data_returns_llm).rename(columns=RENAME_ALGOS)
pd_winrates_llm = pd.DataFrame.from_dict(data_winrates_llm).rename(columns=RENAME_ALGOS)
```

```
In [121... pd_returns_llm.map(analyze_data)
```

Out[121...

|                  | BC ( $\beta=0.0$ ) | BC ( $\beta=0.5$ ) | BC ( $\beta=1.0$ ) | OMAPL      | INDD       | VDN        | MARL-SL    | MisoDICE (ours) |
|------------------|--------------------|--------------------|--------------------|------------|------------|------------|------------|-----------------|
| 2c_vs_64zg       | 8.5 ± 0.1          | 9.7 ± 0.3          | 12.6 ± 0.3         | 12.2 ± 0.4 | 14.6 ± 1.0 | 14.0 ± 1.6 | 12.7 ± 0.6 | 16.4 ± 1.3      |
| 5m_vs_6m         | 5.0 ± 1.1          | 6.7 ± 0.0          | 6.1 ± 0.1          | 5.7 ± 0.2  | 6.7 ± 0.1  | 6.8 ± 0.1  | 6.2 ± 1.4  | 7.3 ± 0.1       |
| 6h_vs_8z         | 7.0 ± 0.0          | 7.4 ± 0.0          | 7.2 ± 0.1          | 6.6 ± 0.2  | 7.5 ± 0.2  | 7.8 ± 0.1  | 8.2 ± 0.2  | 8.7 ± 0.2       |
| corridor         | 1.5 ± 0.1          | 1.5 ± 0.2          | 4.3 ± 0.7          | 2.2 ± 1.3  | 4.4 ± 1.2  | 1.8 ± 0.2  | 4.7 ± 0.6  | 5.8 ± 0.8       |
| protoss_5_vs_5   | 9.2 ± 0.1          | 11.7 ± 0.5         | 10.2 ± 0.5         | 9.6 ± 1.1  | 10.9 ± 0.1 | 11.6 ± 0.3 | 11.5 ± 0.2 | 12.4 ± 0.5      |
| protoss_10_vs_10 | 10.3 ± 0.6         | 11.8 ± 0.5         | 10.6 ± 0.2         | 10.1 ± 0.9 | 11.0 ± 0.7 | 11.9 ± 0.4 | 12.4 ± 0.2 | 12.9 ± 0.2      |
| protoss_10_vs_11 | 8.2 ± 0.4          | 9.6 ± 0.4          | 8.7 ± 0.3          | 8.5 ± 1.2  | 9.4 ± 0.4  | 9.9 ± 0.3  | 10.4 ± 0.1 | 10.7 ± 0.4      |
| protoss_20_vs_20 | 10.1 ± 0.2         | 10.4 ± 0.5         | 10.5 ± 0.3         | 9.4 ± 0.4  | 11.4 ± 0.5 | 13.1 ± 0.4 | 12.1 ± 0.5 | 13.5 ± 0.5      |
| protoss_20_vs_23 | 8.1 ± 0.2          | 8.6 ± 0.3          | 8.3 ± 0.2          | 7.9 ± 0.3  | 9.6 ± 0.3  | 9.6 ± 0.3  | 10.3 ± 0.4 | 10.6 ± 0.2      |
| terran_5_vs_5    | 6.5 ± 0.8          | 8.1 ± 0.5          | 7.1 ± 0.6          | 6.2 ± 0.6  | 7.9 ± 0.5  | 8.1 ± 0.4  | 8.3 ± 1.0  | 9.1 ± 0.3       |
| terran_10_vs_10  | 6.6 ± 0.3          | 7.4 ± 0.4          | 6.7 ± 0.6          | 6.9 ± 1.1  | 7.6 ± 0.4  | 7.7 ± 0.2  | 8.0 ± 0.4  | 9.1 ± 1.3       |
| terran_10_vs_11  | 4.7 ± 0.2          | 5.7 ± 0.3          | 5.2 ± 0.3          | 4.2 ± 0.6  | 5.7 ± 0.5  | 5.7 ± 0.4  | 6.0 ± 0.2  | 6.4 ± 0.5       |
| terran_20_vs_20  | 6.9 ± 0.4          | 7.9 ± 0.8          | 6.7 ± 0.2          | 6.9 ± 0.5  | 8.0 ± 0.5  | 8.6 ± 0.3  | 8.2 ± 0.5  | 9.2 ± 0.6       |
| terran_20_vs_23  | 4.0 ± 0.3          | 5.1 ± 0.4          | 4.3 ± 0.3          | 4.3 ± 0.4  | 5.1 ± 0.4  | 5.1 ± 0.6  | 5.6 ± 0.3  | 5.6 ± 0.4       |
| zerg_5_vs_5      | 5.7 ± 0.5          | 6.6 ± 0.4          | 5.9 ± 0.3          | 6.1 ± 0.5  | 6.4 ± 0.2  | 7.1 ± 0.5  | 7.1 ± 0.9  | 7.5 ± 0.1       |
| zerg_10_vs_10    | 7.3 ± 0.1          | 8.7 ± 0.6          | 7.4 ± 0.7          | 6.8 ± 0.6  | 8.2 ± 0.2  | 9.0 ± 0.4  | 9.7 ± 0.5  | 10.2 ± 0.6      |
| zerg_10_vs_11    | 7.3 ± 0.2          | 8.3 ± 0.4          | 7.3 ± 0.5          | 7.2 ± 0.4  | 8.0 ± 0.2  | 8.8 ± 0.4  | 9.1 ± 0.2  | 9.4 ± 0.3       |
| zerg_20_vs_20    | 7.4 ± 0.6          | 9.0 ± 0.5          | 7.7 ± 0.2          | 6.9 ± 0.5  | 8.3 ± 0.4  | 8.8 ± 0.6  | 9.0 ± 0.5  | 10.2 ± 0.6      |
| zerg_20_vs_23    | 7.1 ± 0.3          | 7.9 ± 0.3          | 7.0 ± 0.2          | 7.1 ± 0.4  | 8.2 ± 0.4  | 8.8 ± 0.2  | 8.7 ± 0.5  | 9.5 ± 0.2       |

In [122...

```
pd_winrates_llm.map(lambda x: analyze_data(x, tag="winrates"))
```

Out[122...

|                  | BC ( $\beta=0.0$ ) | BC ( $\beta=0.5$ ) | BC ( $\beta=1.0$ ) | OMAPL       | INDD       | VDN        | MARL-SL    | MisoDICE (ours) |
|------------------|--------------------|--------------------|--------------------|-------------|------------|------------|------------|-----------------|
| 2c_vs_64zg       | 0.2 ± 0.2          | 0.5 ± 0.3          | 8.9 ± 2.9          | 3.9 ± 3.4   | 11.7 ± 5.5 | 10.6 ± 6.0 | 2.7 ± 1.5  | 13.0 ± 9.0      |
| 5m_vs_6m         | 0.2 ± 0.4          | 0.9 ± 0.6          | 0.1 ± 0.1          | 0.0 ± 0.0   | 0.2 ± 0.2  | 1.1 ± 0.8  | 0.9 ± 0.9  | 1.2 ± 0.5       |
| 6h_vs_8z         | 0.2 ± 0.2          | 0.0 ± 0.0          | 0.2 ± 0.3          | 0.0 ± 0.0   | 0.1 ± 0.1  | 1.0 ± 0.6  | 1.2 ± 0.1  | 1.1 ± 0.8       |
| corridor         | 0.1 ± 0.1          | 0.6 ± 0.7          | 0.3 ± 0.4          | 0.0 ± 0.0   | 0.1 ± 0.1  | 0.9 ± 0.6  | 0.7 ± 0.7  | 1.4 ± 0.6       |
| protoss_5_vs_5   | 13.8 ± 2.7         | 17.5 ± 3.8         | 14.2 ± 2.4         | 14.1 ± 10.2 | 12.4 ± 3.1 | 15.6 ± 4.5 | 10.8 ± 1.6 | 20.7 ± 0.9      |
| protoss_10_vs_10 | 12.1 ± 2.3         | 12.7 ± 0.9         | 11.3 ± 2.9         | 11.7 ± 3.4  | 8.9 ± 1.4  | 11.8 ± 4.3 | 9.5 ± 1.7  | 14.1 ± 2.1      |
| protoss_10_vs_11 | 2.1 ± 0.9          | 3.5 ± 2.0          | 1.8 ± 0.6          | 0.8 ± 1.4   | 2.0 ± 0.4  | 3.5 ± 0.3  | 2.9 ± 0.9  | 4.7 ± 0.3       |
| protoss_20_vs_20 | 4.5 ± 1.8          | 3.4 ± 1.9          | 7.0 ± 2.5          | 3.1 ± 3.8   | 5.2 ± 1.3  | 8.6 ± 2.0  | 5.2 ± 1.9  | 11.0 ± 3.2      |
| protoss_20_vs_23 | 1.5 ± 0.8          | 0.8 ± 0.4          | 1.8 ± 0.8          | 0.8 ± 1.4   | 2.4 ± 0.9  | 2.0 ± 0.9  | 2.6 ± 1.0  | 3.8 ± 2.0       |
| terran_5_vs_5    | 10.1 ± 2.3         | 12.8 ± 1.3         | 13.7 ± 3.5         | 10.2 ± 4.6  | 10.6 ± 1.3 | 9.7 ± 1.9  | 10.4 ± 3.2 | 14.2 ± 3.1      |
| terran_10_vs_10  | 7.3 ± 2.0          | 7.7 ± 2.2          | 7.9 ± 2.4          | 9.4 ± 3.8   | 8.0 ± 2.4  | 8.2 ± 1.6  | 7.0 ± 1.9  | 12.0 ± 1.7      |
| terran_10_vs_11  | 1.9 ± 0.8          | 3.1 ± 1.4          | 2.5 ± 1.1          | 0.8 ± 1.4   | 1.8 ± 0.5  | 2.6 ± 1.2  | 2.4 ± 0.8  | 4.2 ± 1.6       |
| terran_20_vs_20  | 4.5 ± 1.3          | 7.4 ± 2.5          | 4.4 ± 0.6          | 4.7 ± 3.5   | 5.8 ± 0.7  | 7.1 ± 1.4  | 4.5 ± 1.5  | 8.8 ± 1.5       |
| terran_20_vs_23  | 0.6 ± 1.0          | 1.2 ± 0.9          | 0.7 ± 0.7          | 0.0 ± 0.0   | 0.8 ± 0.4  | 1.3 ± 0.7  | 1.3 ± 1.2  | 1.8 ± 1.4       |
| zerg_5_vs_5      | 6.2 ± 0.8          | 5.6 ± 1.1          | 5.9 ± 0.5          | 6.2 ± 5.8   | 6.0 ± 1.4  | 6.7 ± 1.1  | 7.0 ± 1.8  | 7.9 ± 1.0       |
| zerg_10_vs_10    | 4.5 ± 1.4          | 6.9 ± 1.8          | 5.0 ± 1.8          | 3.9 ± 3.4   | 4.6 ± 1.0  | 5.7 ± 1.2  | 5.2 ± 0.6  | 8.9 ± 2.1       |
| zerg_10_vs_11    | 5.7 ± 1.9          | 5.8 ± 1.9          | 5.2 ± 1.3          | 2.3 ± 1.4   | 4.7 ± 1.6  | 6.0 ± 1.9  | 3.4 ± 0.7  | 6.8 ± 1.1       |
| zerg_20_vs_20    | 0.8 ± 0.9          | 1.5 ± 0.6          | 1.3 ± 0.8          | 0.0 ± 0.0   | 0.2 ± 0.2  | 1.2 ± 0.5  | 0.6 ± 0.2  | 2.4 ± 0.6       |
| zerg_20_vs_23    | 1.2 ± 0.9          | 0.7 ± 0.3          | 1.2 ± 0.6          | 1.6 ± 1.6   | 1.4 ± 0.5  | 1.9 ± 0.9  | 1.8 ± 1.1  | 2.7 ± 0.4       |

In [123...

```
def update_legend(fig, tag="returns", distance=1.1, yrange=None):
    trace_names = []
    for trace in fig.data:
        if trace.name is not None and trace.name not in trace_names:
            trace_names.append(trace.name)
            trace.update(showlegend=True)
        else:
            trace.update(showlegend=False)
    fig.update_layout(legend=dict(orientation="h", yanchor="bottom", y=distance, xanchor="right", x=1))

    fig.update_xaxes(showgrid=True)
    fig.update_yaxes(showgrid=True)
```

```

fig.update_xaxes(range=[0, 100], dtick=50, minor=dict(ticklen=3, nticks=3))

if tag == "winrates":
    fig.update_yaxes(tickformat=".0%", dtick=0.1, minor=dict(ticklen=3, nticks=2))
else:
    fig.update_yaxes(tickformat="~s")
if yrange is not None:
    fig.update_yaxes(range=yrange)
return fig

```

In [124...

```

def create_scatters(env_name, data_dict, y_range=None, tag="returns", algos=None, rename_algos=None):
    fig = go.Figure()
    if not algos:
        algos = MAIN_ALGOS_2
    if not rename_algos:
        rename_algos = RENAME_ALGOS
    for algo in algos:
        steps = []
        values = []
        stds = []
        for step in range(101):
            if step < 1:
                continue
            data = np.array(data_dict[algo][env_name][step])
            steps.append(step)
            values.append(data.mean())
            stds.append(data.std())
        values = smooth(values)

        uppers = [value + std for value, std in zip(values, stds)]
        lowers = [value - std for value, std in zip(values, stds)]

        if tag == "winrates":
            uppers = [min(1.0, value) for value in uppers]
            lowers = [max(0.0, value) for value in lowers]

        color = COLOR_MAPS.get(algo, colors[2])
        algo_name = rename_algos.get(algo, algo)
        opacity = 0.1
        line_width = 1.5
        fig.add_trace(go.Scatter(x=steps, y=values, mode="lines", name=algo_name, line_color=color, line_width=line_width))
        fig.add_trace(go.Scatter(x=steps+steps[::-1], y=uppers+lowers[::-1], fill="toself", fillcolor=color, line_color=color,

    if tag == "winrates":
        tickformat = ".0%"
    else:
        tickformat = "~s"

    fig.update_layout(template='simple_white', margin=dict(l=0, r=0, t=0, b=0, pad=0, autoexpand=True))
    fig.update_layout(height=130, width=180)
    fig.update_xaxes(range=[0, 100], dtick=50, minor=dict(ticklen=3, nticks=4))
    fig.update_yaxes(range=y_range, tickformat=tickformat)
    fig.update_layout(showlegend=False)
    return fig

```

In [125...

```

def show_fig(plotly_figs, env_names, n_rows, n_cols, height, width, title):
    tag = "returns" if "returns" in title.lower() else "winrates"
    prefix = "ablation_" if "ablation" in title.lower() else ""
    fig = make_subplots(rows=n_rows, cols=n_cols, subplot_titles=env_names)
    if any(env_name in SMACV2_ENV_NAMES for env_name in env_names):
        for i, mode in enumerate(["5_vs_5", "10_vs_10", "10_vs_11", "20_vs_20", "20_vs_23"]):
            for j, env_name in enumerate(["protoss", "terran", "zerg"]):
                plotly_fig = plotly_figs[f"{env_name}_{mode}"]
                plotly_fig.write_image(f"graphs/{prefix}{env_name}_{mode}_llm_{tag}.pdf")
                fig.add_traces(plotly_fig.data, rows=j+1, cols=i+1)
    else:
        for i, env_name in enumerate(env_names):
            plotly_fig = plotly_figs[env_name]
            plotly_fig.write_image(f"graphs/{prefix}{env_name}_llm_{tag}.pdf")
            fig.add_traces(plotly_fig.data, rows=1, cols=i+1)
    fig.update_layout(template='simple_white')
    fig.update_layout(height=height, width=width, title_text=title)
    fig = update_legend(fig, tag=tag, distance=1.15)
    fig.show("svg")
    fig.update_layout(title_text=None)
    title = title.replace(" - ", "_").replace(" ", "_").replace(":", "_").replace("__", "_")
    print(f"Saving {title}.pdf")
    fig.write_image(f"graphs/{title}.pdf")

```

In [126...

```

plotly_figs = {}
for env_name in SMACV1_ENV_NAMES + SMACV2_ENV_NAMES:
    plotly_figs[env_name] = create_scatters(env_name, data_returns_llm)

show_fig(plotly_figs, SMACV1_ENV_NAMES, n_rows=1, n_cols=4, height=300, width=950, title="SMACv1 - Returns - LLM-based")
show_fig(plotly_figs, SMACV2_ENV_NAMES, n_rows=3, n_cols=5, height=640, width=1200, title="SMACv2 - Returns - LLM-based")

```



### SMACv1 - Returns - LLM-based

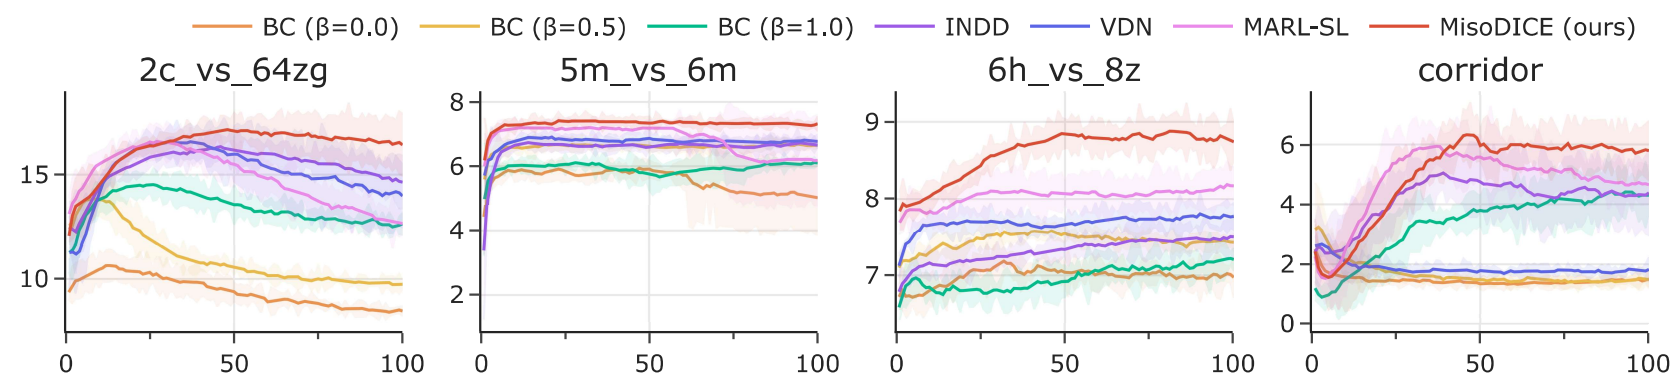

Saving SMACv1\_Returns\_LLM-based.pdf

### SMACv2 - Returns - LLM-based

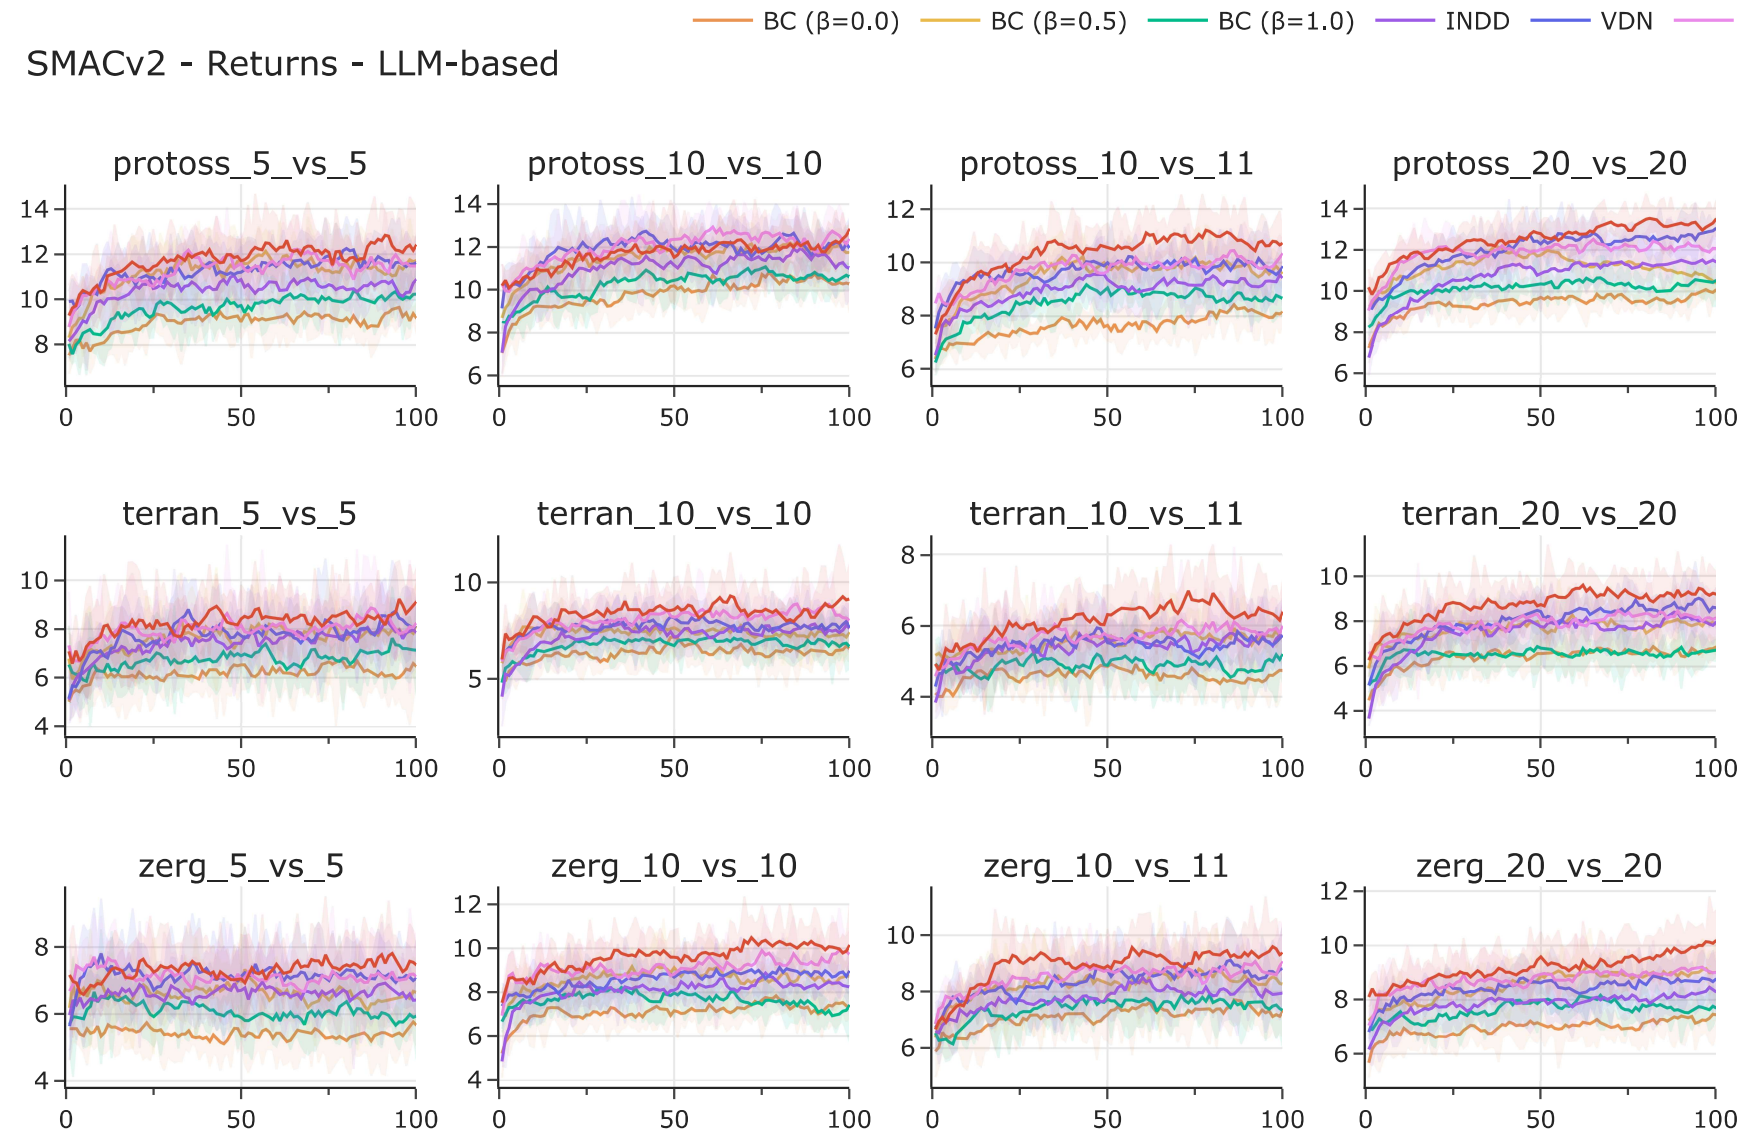

Saving SMACv2\_Returns\_LLM-based.pdf

In [127...

```
plotly_figs = {}
for env_name in SMACV1_ENV_NAMES + SMACV2_ENV_NAMES:
    plotly_figs[env_name] = create_scatters(env_name, data_winrates_llm, tag="winrates")

show_fig(plotly_figs, SMACV1_ENV_NAMES, n_rows=1, n_cols=4, height=300, width=950, title="SMACv1 - Winrates - LLM-based")
show_fig(plotly_figs, SMACV2_ENV_NAMES, n_rows=3, n_cols=5, height=640, width=1200, title="SMACv2 - Winrates - LLM-based")
```

### SMACv1 - Winrates - LLM-based

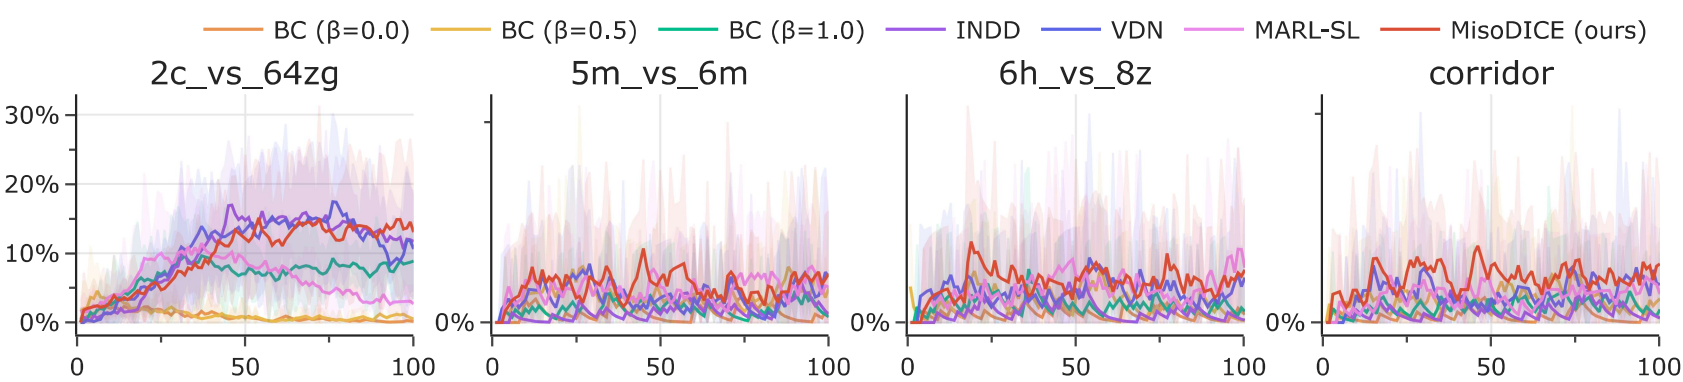

Saving SMACv1\_Winrates\_LLM-based.pdf

## SMACv2 - Winrates - LLM-based

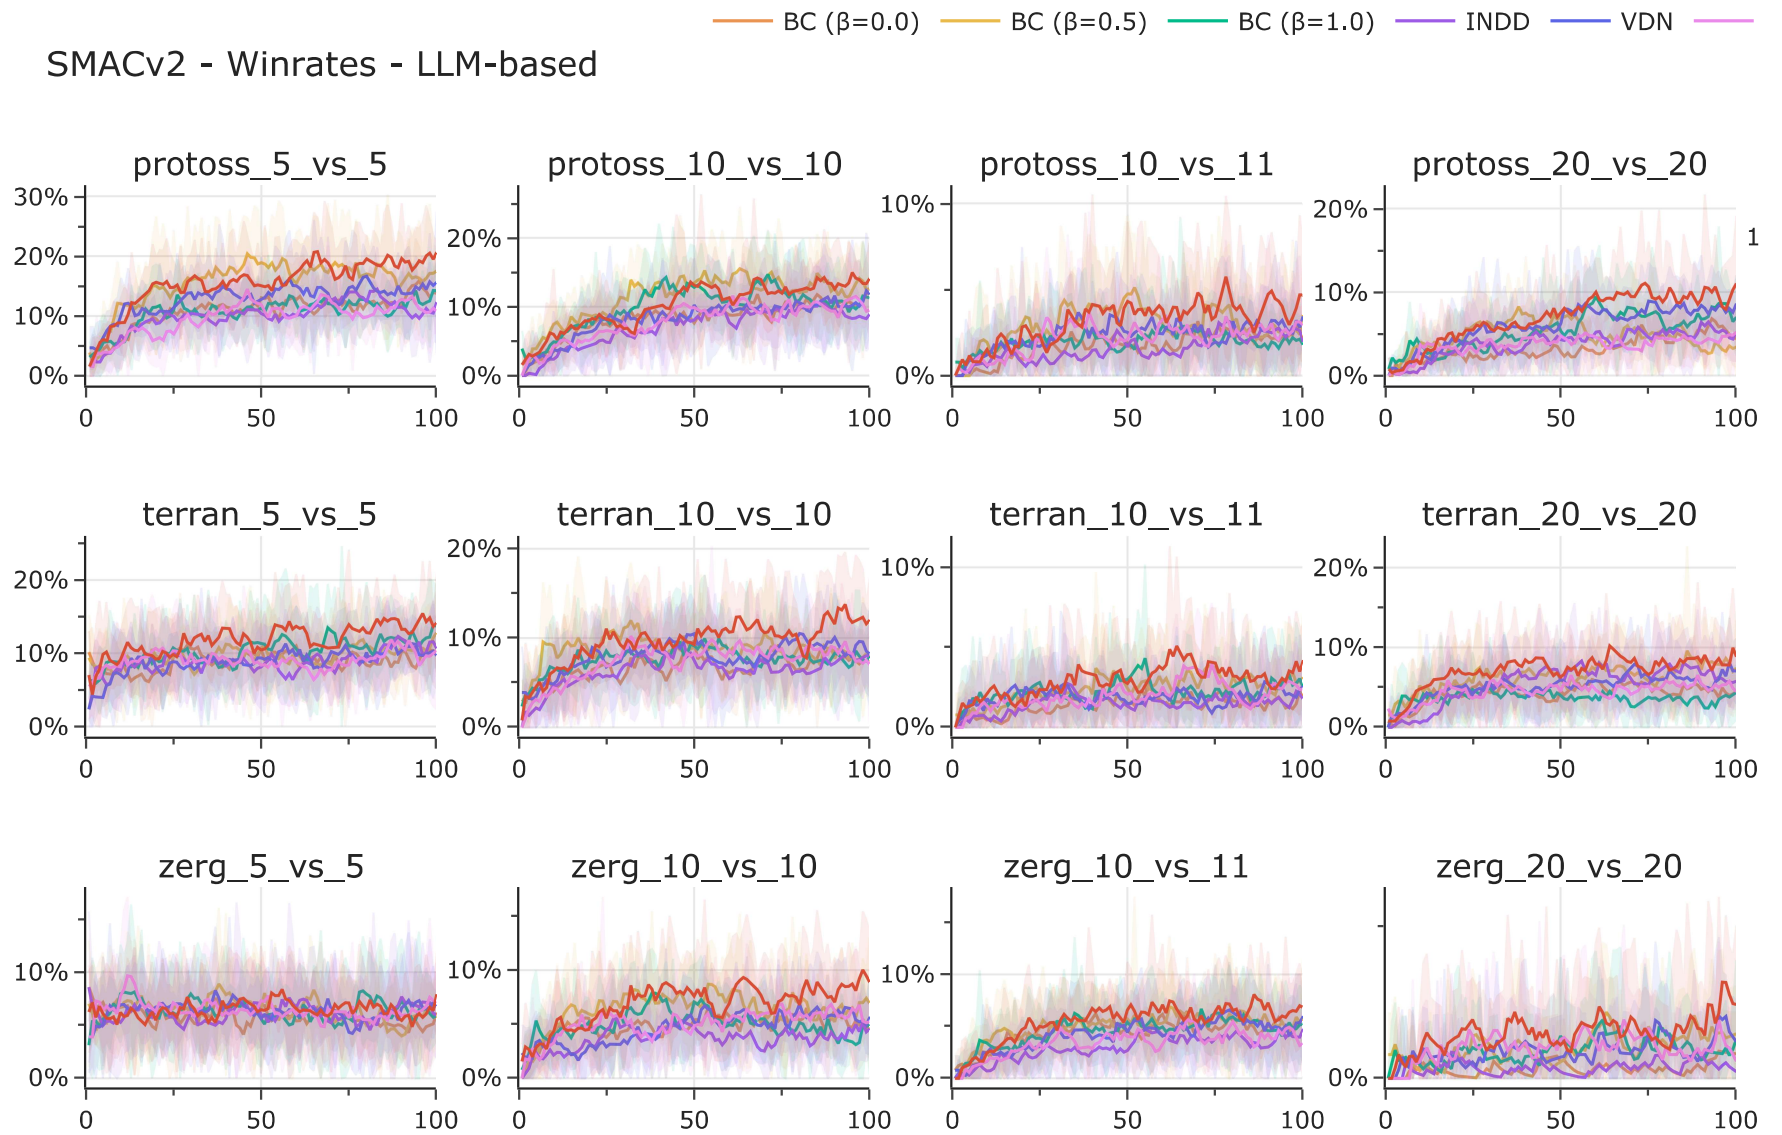

Saving SMACv2\_Winrates\_LLM-based.pdf

```
In [128... def show_box_chart(pd_data, env_names, tag="returns"):
    pd_data = pd_data.map(lambda x: analyze_data(x, tag=None))
    fig = go.Figure()
    for i, exsize in enumerate([50, 200, 400, 800, 1200]):
        all_values = []
        for env_name in env_names:
            values = pd_data[exsize][env_name]
            all_values.extend(values)
        fig.add_trace(go.Box(y=all_values, name=exsize, marker_color=colors[0], boxpoints=False))

    if tag == "winrates":
        tickformat = ".0%"
    else:
        tickformat = "~s"

    fig.update_layout(template='simple_white', margin=dict(l=0, r=0, t=0, b=0, pad=0, autoexpand=True))
    fig.update_layout(height=160, width=240)
    fig.update_layout(showlegend=False)
    fig.update_yaxes(tickformat=tickformat)
    env_name = env_name.split("_")[0]
    fig.write_image(f"graphs/{env_name}_llm_{tag}_box.pdf")
    fig.show("svg")
```

```
In [129... ablation_exsize_returns_llm = {}
ablation_exsize_winrates_llm = {}
for exsize in [50, 200, 400, 800, 1200]:
    data_returns, data_winrates = load_data(use_llm=True, exsize=exsize, algos=["miso_alpha0.05"])
    ablation_exsize_returns_llm[exsize] = data_returns["miso_alpha0.05"]
    ablation_exsize_winrates_llm[exsize] = data_winrates["miso_alpha0.05"]
```

```
In [130... topk_names = {exsize: f"topk={exsize}" for exsize in [50, 200, 400, 800, 1200]}
PROTOSS_ENVS = [env_name for env_name in SMACV2_ENV_NAMES if "protoss" in env_name]
TERRAN_ENVS = [env_name for env_name in SMACV2_ENV_NAMES if "terran" in env_name]
ZERG_ENVS = [env_name for env_name in SMACV2_ENV_NAMES if "zerg" in env_name]
```

```
In [131... pd_returns_llm = pd.DataFrame.from_dict(ablation_exsize_returns_llm)
pd_returns_llm.rename(columns=topk_names).map(analyze_data)
```



Out[131...

|                  | topk=50    | topk=200   | topk=400   | topk=800   | topk=1200  |
|------------------|------------|------------|------------|------------|------------|
| 2c_vs_64zg       | 11.8 ± 1.4 | 16.4 ± 1.3 | 9.7 ± 0.1  | 10.8 ± 0.7 | 10.4 ± 0.5 |
| 5m_vs_6m         | 6.9 ± 0.4  | 7.3 ± 0.1  | 6.8 ± 0.2  | 6.5 ± 0.1  | 6.4 ± 0.2  |
| 6h_vs_8z         | 7.9 ± 0.1  | 8.7 ± 0.2  | 7.8 ± 0.2  | 7.5 ± 0.1  | 7.3 ± 0.1  |
| corridor         | 3.1 ± 1.0  | 5.8 ± 0.8  | 1.9 ± 0.1  | 1.7 ± 0.2  | 1.7 ± 0.1  |
| protoss_5_vs_5   | 11.9 ± 0.2 | 12.4 ± 0.5 | 11.3 ± 0.2 | 10.9 ± 0.2 | 10.9 ± 0.5 |
| protoss_10_vs_10 | 11.8 ± 0.1 | 12.9 ± 0.2 | 12.1 ± 0.3 | 11.5 ± 0.3 | 11.2 ± 0.4 |
| protoss_10_vs_11 | 9.6 ± 0.1  | 10.7 ± 0.4 | 9.5 ± 0.3  | 9.3 ± 0.5  | 9.2 ± 0.3  |
| protoss_20_vs_20 | 11.4 ± 0.5 | 13.5 ± 0.5 | 12.1 ± 0.1 | 11.4 ± 0.3 | 11.2 ± 0.3 |
| protoss_20_vs_23 | 9.8 ± 0.3  | 10.6 ± 0.2 | 10.0 ± 0.2 | 9.3 ± 0.2  | 8.7 ± 0.4  |
| terran_5_vs_5    | 8.0 ± 0.3  | 9.1 ± 0.3  | 7.3 ± 0.4  | 7.7 ± 0.4  | 7.0 ± 0.5  |
| terran_10_vs_10  | 8.4 ± 0.4  | 9.1 ± 1.3  | 8.1 ± 0.5  | 7.6 ± 0.7  | 7.0 ± 0.4  |
| terran_10_vs_11  | 5.5 ± 0.1  | 6.4 ± 0.5  | 6.1 ± 0.2  | 5.7 ± 0.4  | 5.4 ± 0.5  |
| terran_20_vs_20  | 8.0 ± 0.4  | 9.2 ± 0.6  | 8.2 ± 0.6  | 8.0 ± 0.5  | 7.9 ± 0.5  |
| terran_20_vs_23  | 5.1 ± 0.2  | 5.6 ± 0.4  | 5.1 ± 0.2  | 5.2 ± 0.2  | 4.8 ± 0.2  |
| zerg_5_vs_5      | 7.4 ± 0.4  | 7.5 ± 0.1  | 6.9 ± 0.5  | 6.4 ± 0.5  | 6.2 ± 0.5  |
| zerg_10_vs_10    | 9.2 ± 0.3  | 10.2 ± 0.6 | 9.0 ± 0.3  | 8.8 ± 0.2  | 8.3 ± 0.2  |
| zerg_10_vs_11    | 8.5 ± 0.4  | 9.4 ± 0.3  | 8.5 ± 0.0  | 8.2 ± 0.2  | 7.6 ± 0.3  |
| zerg_20_vs_20    | 8.9 ± 0.1  | 10.2 ± 0.6 | 8.8 ± 0.9  | 8.3 ± 0.5  | 8.1 ± 0.6  |
| zerg_20_vs_23    | 8.4 ± 0.4  | 9.5 ± 0.2  | 8.8 ± 0.2  | 8.5 ± 0.2  | 8.0 ± 0.1  |

In [132...

```
pd_winrates_llm = pd.DataFrame.from_dict(ablation_exsize_winrates_llm)
pd_winrates_llm.rename(columns=topk_names).map(lambda x: analyze_data(x, tag="winrates"))
```

Out[132...

|                  | topk=50   | topk=200   | topk=400   | topk=800   | topk=1200 |
|------------------|-----------|------------|------------|------------|-----------|
| 2c_vs_64zg       | 5.6 ± 4.9 | 13.0 ± 9.0 | 1.6 ± 0.7  | 1.7 ± 0.8  | 0.6 ± 0.7 |
| 5m_vs_6m         | 0.0 ± 0.0 | 1.2 ± 0.5  | 0.0 ± 0.0  | 0.0 ± 0.0  | 0.0 ± 0.0 |
| 6h_vs_8z         | 0.0 ± 0.0 | 1.1 ± 0.8  | 0.0 ± 0.0  | 0.0 ± 0.0  | 0.0 ± 0.0 |
| corridor         | 0.0 ± 0.0 | 1.4 ± 0.6  | 0.0 ± 0.0  | 0.0 ± 0.0  | 0.0 ± 0.0 |
| protoss_5_vs_5   | 8.9 ± 1.9 | 20.7 ± 0.9 | 10.1 ± 2.8 | 12.5 ± 1.7 | 9.4 ± 1.7 |
| protoss_10_vs_10 | 5.3 ± 1.8 | 14.1 ± 2.1 | 11.1 ± 3.3 | 10.0 ± 3.0 | 5.7 ± 1.6 |
| protoss_10_vs_11 | 0.3 ± 0.4 | 4.7 ± 0.3  | 2.2 ± 1.2  | 2.0 ± 1.0  | 1.6 ± 0.6 |
| protoss_20_vs_20 | 2.8 ± 0.8 | 11.0 ± 3.2 | 3.6 ± 1.4  | 6.1 ± 1.9  | 3.4 ± 0.9 |
| protoss_20_vs_23 | 0.6 ± 0.4 | 3.8 ± 2.0  | 2.2 ± 0.8  | 1.8 ± 1.2  | 1.0 ± 0.4 |
| terran_5_vs_5    | 8.5 ± 1.9 | 14.2 ± 3.1 | 9.8 ± 2.1  | 10.4 ± 2.1 | 5.1 ± 1.1 |
| terran_10_vs_10  | 7.7 ± 0.6 | 12.0 ± 1.7 | 7.9 ± 2.1  | 8.1 ± 3.8  | 5.2 ± 0.3 |
| terran_10_vs_11  | 0.8 ± 0.6 | 4.2 ± 1.6  | 2.2 ± 1.2  | 1.4 ± 0.9  | 0.6 ± 0.4 |
| terran_20_vs_20  | 3.7 ± 0.4 | 8.8 ± 1.5  | 4.3 ± 0.6  | 6.0 ± 1.6  | 5.2 ± 1.2 |
| terran_20_vs_23  | 0.5 ± 0.3 | 1.8 ± 1.4  | 0.6 ± 0.6  | 0.3 ± 0.4  | 0.1 ± 0.1 |
| zerg_5_vs_5      | 5.6 ± 1.3 | 7.9 ± 1.0  | 5.3 ± 1.1  | 4.7 ± 1.6  | 3.8 ± 0.6 |
| zerg_10_vs_10    | 3.4 ± 1.7 | 8.9 ± 2.1  | 5.6 ± 1.5  | 6.7 ± 1.1  | 3.5 ± 1.0 |
| zerg_10_vs_11    | 2.5 ± 1.0 | 6.8 ± 1.1  | 4.6 ± 1.6  | 4.5 ± 1.3  | 2.8 ± 0.6 |
| zerg_20_vs_20    | 0.3 ± 0.3 | 2.4 ± 0.6  | 0.3 ± 0.3  | 0.4 ± 0.5  | 0.3 ± 0.3 |
| zerg_20_vs_23    | 0.6 ± 0.3 | 2.7 ± 0.4  | 1.4 ± 0.7  | 1.1 ± 1.0  | 1.2 ± 0.7 |

In [133...

```
show_box_chart(pd_returns_llm, PROTOSS_ENVS, tag="returns")
show_box_chart(pd_returns_llm, TERRAN_ENVS, tag="returns")
show_box_chart(pd_returns_llm, ZERG_ENVS, tag="returns")
```

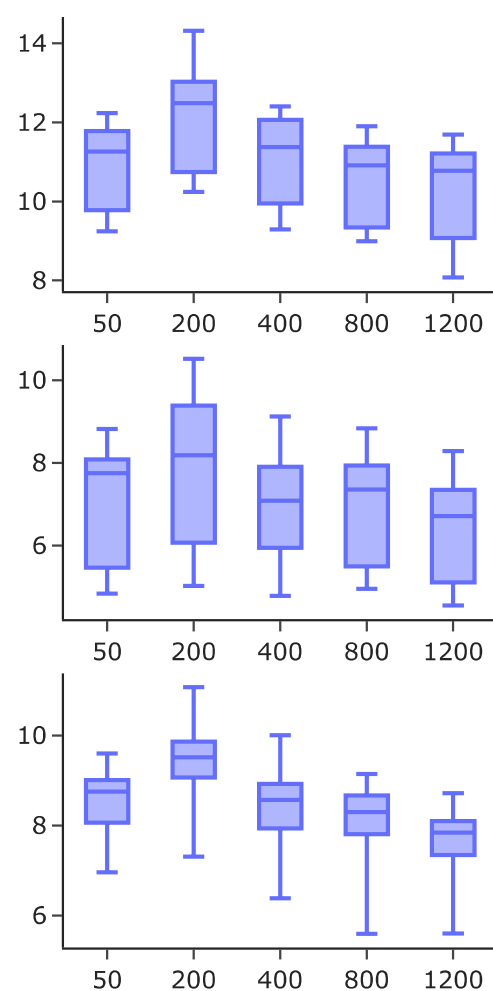

```
In [134... show_box_chart(pd_winrates_llm, PROTOSS_ENVS, tag="winrates")
show_box_chart(pd_winrates_llm, TERRAN_ENVS, tag="winrates")
show_box_chart(pd_winrates_llm, ZERG_ENVS, tag="winrates")
```

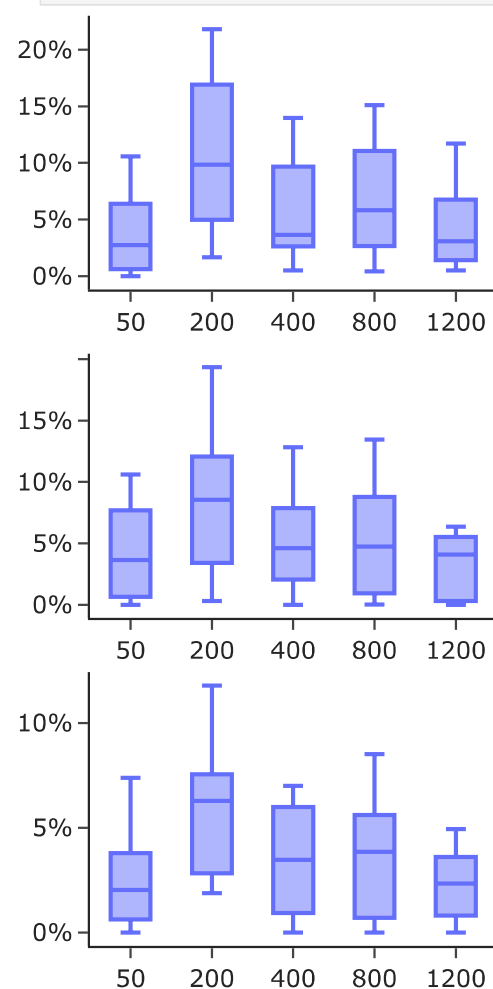

```
In [135... plotly_figs = {}
for env_name in SMACV2_ENV_NAMES:
    plotly_figs[env_name] = create_scatters(env_name, ablation_exsize_returns_llm, algos=[50, 200, 400, 800, 1200])

show_fig(plotly_figs, SMACV2_ENV_NAMES, n_rows=3, n_cols=5, height=640, width=1200, title="Ablation: SMACv2 - Returns - Rule-b
```

Ablation: SMACv2 - Returns - Rule-based

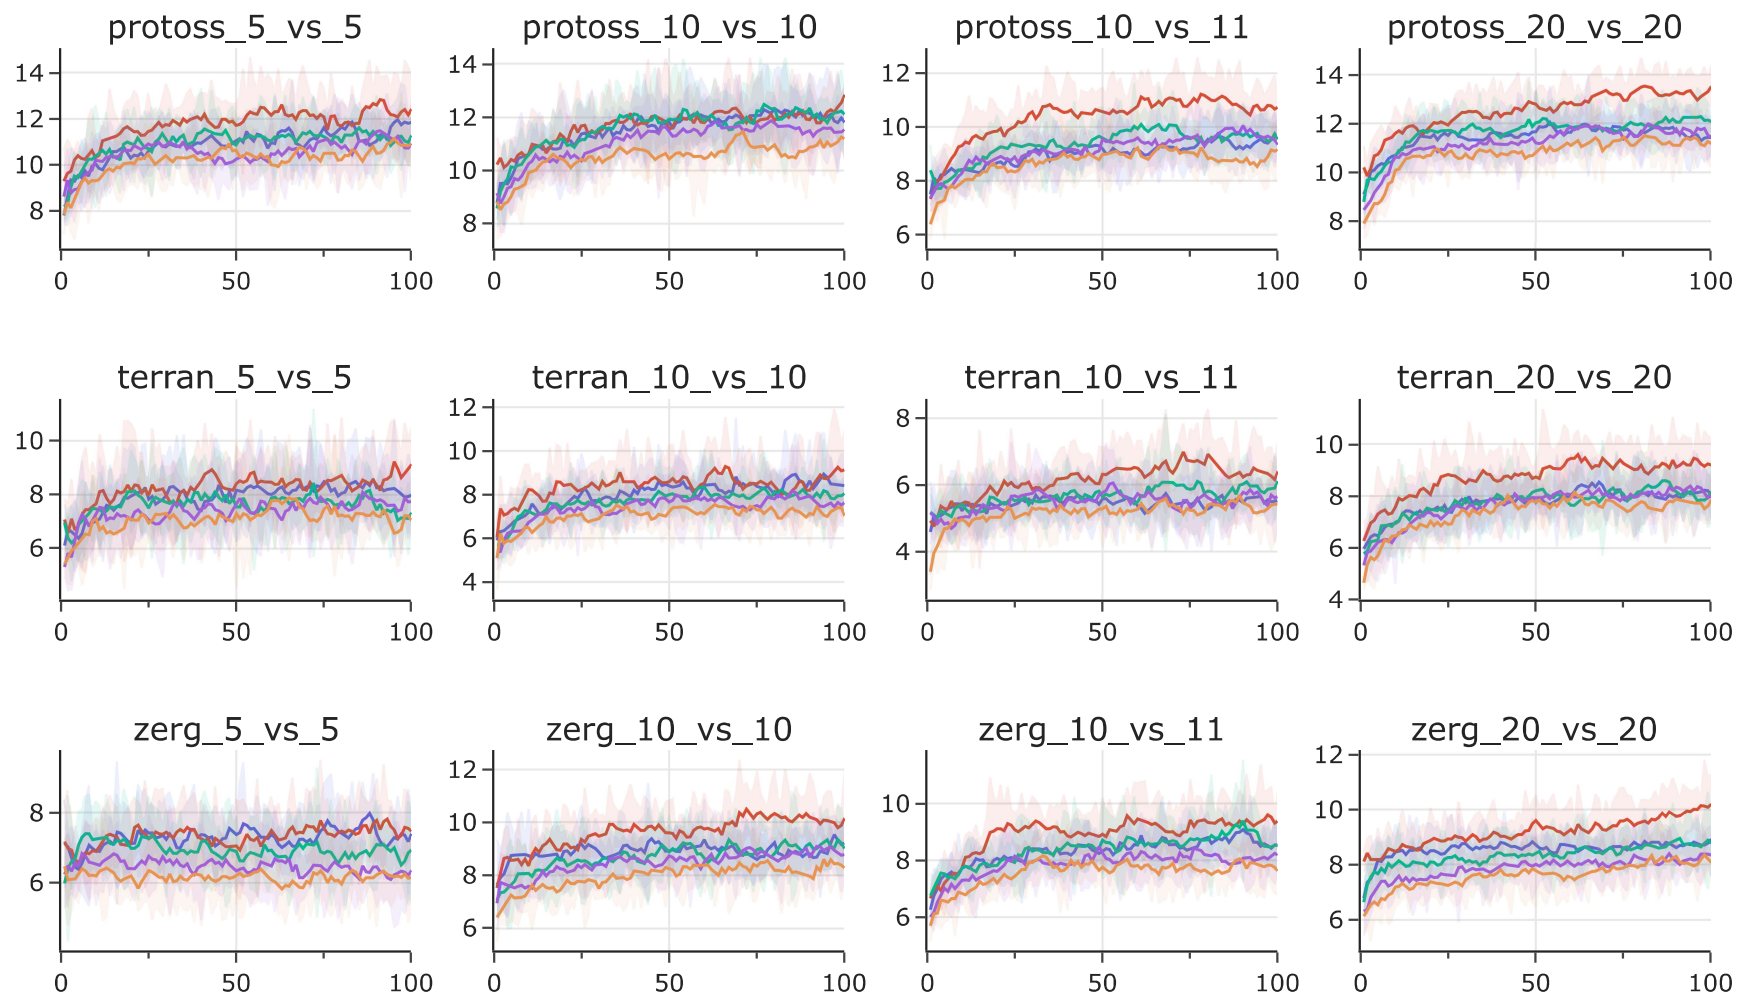

Saving Ablation\_SMACv2\_Returns\_Rule-based.pdf

```
In [136... plotly_figs = {}  
for env_name in SMACV2_ENV_NAMES:  
    plotly_figs[env_name] = create_scatters(env_name, ablation_exsize_winrates_llm, algos=[50, 200, 400, 800, 1200], tag="winr  
show_fig(plotly_figs, SMACV2_ENV_NAMES, n_rows=3, n_cols=5, height=640, width=1200, title="Ablation: SMACv2 - Winrates - Rule-
```

Ablation: SMACv2 - Winrates - Rule-based

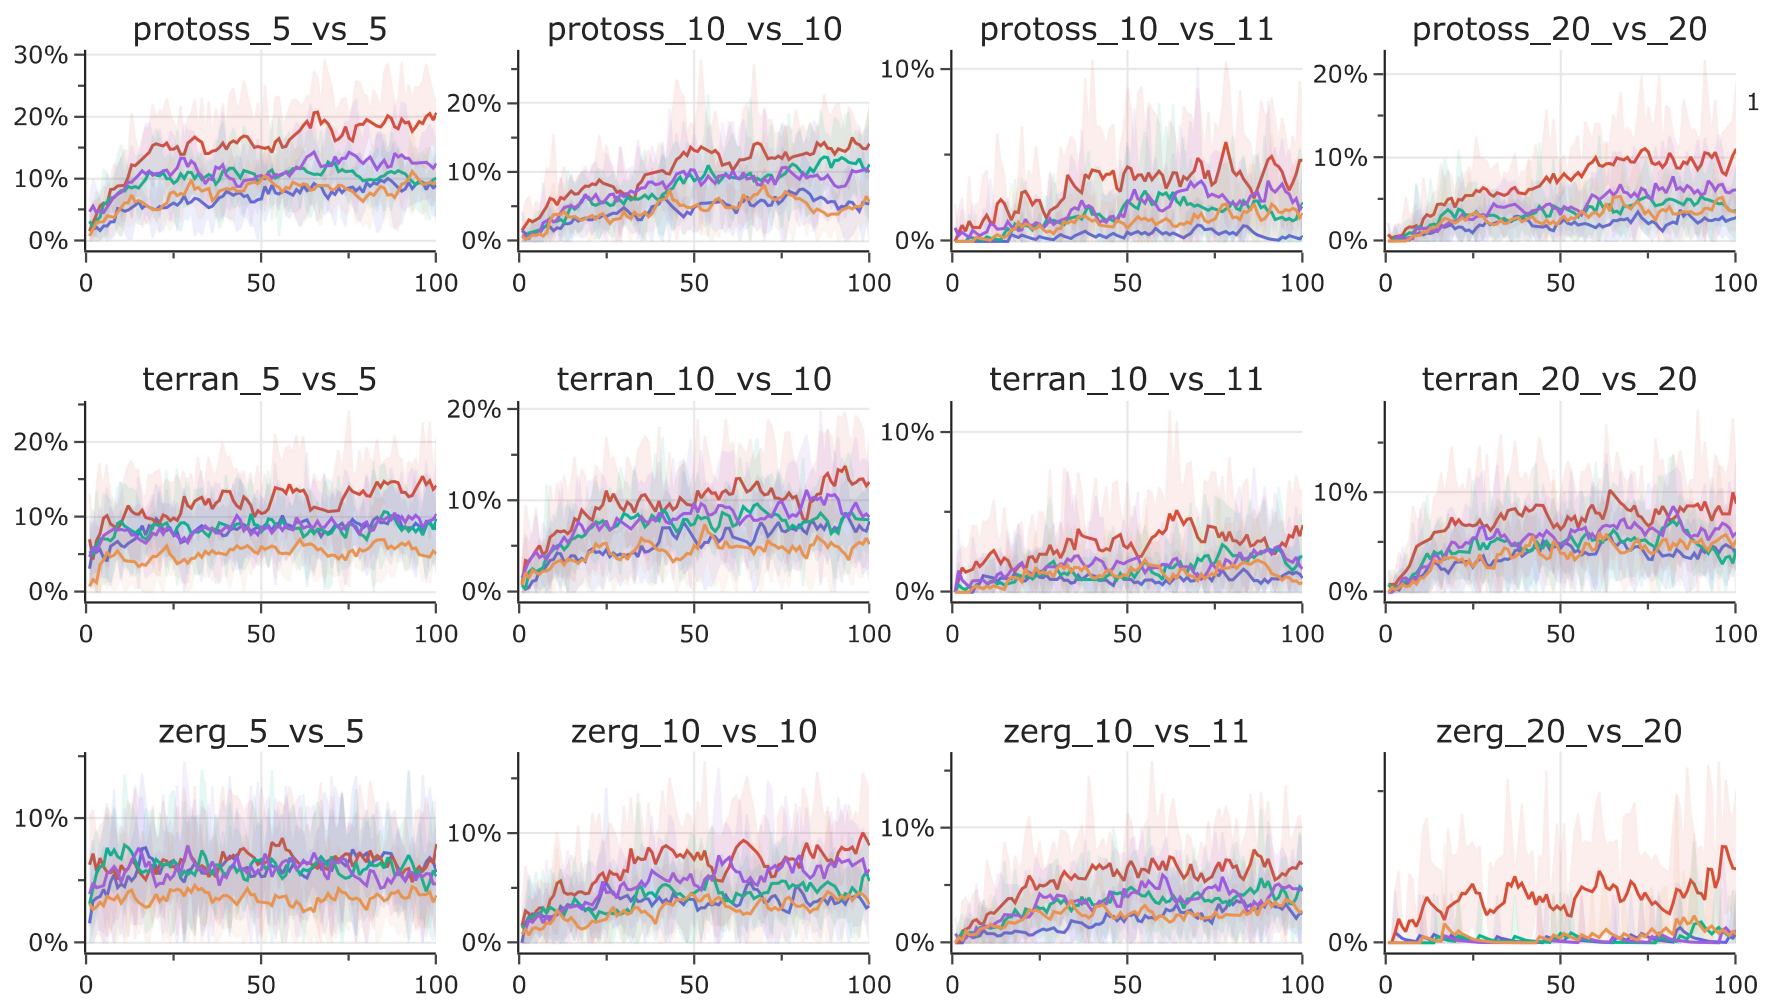

Saving Ablation\_SMACv2\_Winrates\_Rule-based.pdf



In [137...

RENAME\_ALGOS\_GPT = {  
 "miso-mini": "MisoDICE (gpt-4o-mini)",  
 "miso\_alpha0.05": "MisoDICE (gpt-4o)",  
}

In [138...

data\_returns\_llm, data\_winrates\_llm = load\_data(use\_llm=True, algos=["miso-mini", "miso\_alpha0.05"])  
pd\_returns\_llm = pd.DataFrame.from\_dict(data\_returns\_llm).rename(columns=RENAME\_ALGOS\_GPT)  
pd\_winrates\_llm = pd.DataFrame.from\_dict(data\_winrates\_llm).rename(columns=RENAME\_ALGOS\_GPT)

In [139...

pd\_returns\_llm.map(analyze\_data)

Out[139...

|                  | MisoDICE (gpt-4o-mini) | MisoDICE (gpt-4o) |
|------------------|------------------------|-------------------|
| 2c_vs_64zg       | 12.2 ± 0.6             | 16.4 ± 1.3        |
| 5m_vs_6m         | 6.7 ± 0.9              | 7.3 ± 0.1         |
| 6h_vs_8z         | 8.1 ± 0.2              | 8.7 ± 0.2         |
| corridor         | 3.8 ± 0.8              | 5.8 ± 0.8         |
| protoss_5_vs_5   | 12.0 ± 0.3             | 12.4 ± 0.5        |
| protoss_10_vs_10 | 12.0 ± 0.5             | 12.9 ± 0.2        |
| protoss_10_vs_11 | 10.6 ± 0.3             | 10.7 ± 0.4        |
| protoss_20_vs_20 | 12.4 ± 0.5             | 13.5 ± 0.5        |
| protoss_20_vs_23 | 10.3 ± 0.1             | 10.6 ± 0.2        |
| terran_5_vs_5    | 8.1 ± 0.5              | 9.1 ± 0.3         |
| terran_10_vs_10  | 8.6 ± 0.9              | 9.1 ± 1.3         |
| terran_10_vs_11  | 6.0 ± 0.3              | 6.4 ± 0.5         |
| terran_20_vs_20  | 8.1 ± 0.5              | 9.2 ± 0.6         |
| terran_20_vs_23  | 5.3 ± 0.3              | 5.6 ± 0.4         |
| zerg_5_vs_5      | 7.0 ± 0.4              | 7.5 ± 0.1         |
| zerg_10_vs_10    | 9.6 ± 0.2              | 10.2 ± 0.6        |
| zerg_10_vs_11    | 9.2 ± 0.6              | 9.4 ± 0.3         |
| zerg_20_vs_20    | 8.9 ± 0.4              | 10.2 ± 0.6        |
| zerg_20_vs_23    | 9.0 ± 0.2              | 9.5 ± 0.2         |

In [140...

pd\_winrates\_llm.map(lambda x: analyze\_data(x, tag="winrates"))

Out[140...

|                  | MisoDICE (gpt-4o-mini) | MisoDICE (gpt-4o) |
|------------------|------------------------|-------------------|
| 2c_vs_64zg       | 2.1 ± 1.1              | 13.0 ± 9.0        |
| 5m_vs_6m         | 1.2 ± 0.4              | 1.2 ± 0.5         |
| 6h_vs_8z         | 0.1 ± 0.1              | 1.1 ± 0.8         |
| corridor         | 0.6 ± 0.7              | 1.4 ± 0.6         |
| protoss_5_vs_5   | 12.6 ± 2.6             | 20.7 ± 0.9        |
| protoss_10_vs_10 | 10.5 ± 3.5             | 14.1 ± 2.1        |
| protoss_10_vs_11 | 4.0 ± 1.8              | 4.7 ± 0.3         |
| protoss_20_vs_20 | 6.0 ± 0.9              | 11.0 ± 3.2        |
| protoss_20_vs_23 | 2.3 ± 1.4              | 3.8 ± 2.0         |
| terran_5_vs_5    | 10.0 ± 1.4             | 14.2 ± 3.1        |
| terran_10_vs_10  | 9.2 ± 2.1              | 12.0 ± 1.7        |
| terran_10_vs_11  | 2.2 ± 1.1              | 4.2 ± 1.6         |
| terran_20_vs_20  | 6.1 ± 2.1              | 8.8 ± 1.5         |
| terran_20_vs_23  | 0.9 ± 0.6              | 1.8 ± 1.4         |
| zerg_5_vs_5      | 5.3 ± 1.1              | 7.9 ± 1.0         |
| zerg_10_vs_10    | 7.1 ± 0.9              | 8.9 ± 2.1         |
| zerg_10_vs_11    | 5.0 ± 0.9              | 6.8 ± 1.1         |
| zerg_20_vs_20    | 0.8 ± 0.8              | 2.4 ± 0.6         |
| zerg_20_vs_23    | 1.7 ± 0.8              | 2.7 ± 0.4         |

```
In [141... RENAME_ALGOS_2 = {
    "miso_alpha0.00": "MisoDICE ( $\alpha=0.00$ )",
    "miso_alpha0.05": "MisoDICE ( $\alpha=0.05$ )",
    "miso_alpha0.10": "MisoDICE ( $\alpha=0.10$ )",
    "miso_alpha0.50": "MisoDICE ( $\alpha=0.50$ )",
    "miso_alpha1.00": "MisoDICE ( $\alpha=1.00$ )",
    "miso_alpha10.00": "MisoDICE ( $\alpha=10.0$ )",
}
data_returns_llm, data_winrates_llm = load_data(use_llm=True, algos=ABLATION_ALGOS)
pd_returns_llm = pd.DataFrame.from_dict(data_returns_llm).rename(columns=RENAME_ALGOS_2)
pd_winrates_llm = pd.DataFrame.from_dict(data_winrates_llm).rename(columns=RENAME_ALGOS_2)
```

```
In [142... pd_returns_llm.map(analyze_data)
```

Out[142...

|                  | MisoDICE<br>( $\alpha=0.00$ ) | MisoDICE<br>( $\alpha=0.05$ ) | MisoDICE<br>( $\alpha=0.10$ ) | MisoDICE<br>( $\alpha=0.50$ ) | MisoDICE<br>( $\alpha=1.00$ ) | MisoDICE<br>( $\alpha=10.0$ ) |
|------------------|-------------------------------|-------------------------------|-------------------------------|-------------------------------|-------------------------------|-------------------------------|
| 2c_vs_64zg       | 15.9 ± 1.0                    | 16.4 ± 1.3                    | 15.3 ± 1.1                    | 14.9 ± 0.7                    | 13.3 ± 0.9                    | 10.9 ± 0.3                    |
| 5m_vs_6m         | 6.6 ± 1.4                     | 7.3 ± 0.1                     | 6.3 ± 1.0                     | 6.5 ± 0.5                     | 6.9 ± 0.2                     | 6.7 ± 0.1                     |
| 6h_vs_8z         | 8.3 ± 0.2                     | 8.7 ± 0.2                     | 8.0 ± 0.2                     | 8.0 ± 0.2                     | 7.7 ± 0.2                     | 7.6 ± 0.1                     |
| corridor         | 5.3 ± 0.6                     | 5.8 ± 0.8                     | 5.3 ± 0.6                     | 5.1 ± 0.2                     | 3.8 ± 0.9                     | 1.7 ± 0.1                     |
| protoss_5_vs_5   | 12.4 ± 0.4                    | 12.4 ± 0.5                    | 11.7 ± 0.4                    | 11.8 ± 0.4                    | 11.9 ± 0.3                    | 11.7 ± 0.4                    |
| protoss_10_vs_10 | 12.1 ± 0.2                    | 12.9 ± 0.2                    | 12.2 ± 0.6                    | 12.1 ± 0.3                    | 11.6 ± 0.5                    | 12.1 ± 0.4                    |
| protoss_10_vs_11 | 10.7 ± 0.5                    | 10.7 ± 0.4                    | 10.1 ± 0.5                    | 10.1 ± 0.4                    | 9.8 ± 0.3                     | 9.9 ± 0.1                     |
| protoss_20_vs_20 | 12.4 ± 0.2                    | 13.5 ± 0.5                    | 12.3 ± 0.4                    | 12.2 ± 0.5                    | 11.8 ± 0.2                    | 12.1 ± 0.4                    |
| protoss_20_vs_23 | 10.4 ± 0.4                    | 10.6 ± 0.2                    | 10.1 ± 0.3                    | 10.1 ± 0.2                    | 10.0 ± 0.2                    | 9.6 ± 0.5                     |
| terran_5_vs_5    | 8.8 ± 0.7                     | 9.1 ± 0.3                     | 8.4 ± 0.8                     | 8.5 ± 0.2                     | 7.9 ± 0.4                     | 8.2 ± 0.3                     |
| terran_10_vs_10  | 8.9 ± 0.8                     | 9.1 ± 1.3                     | 8.5 ± 0.6                     | 8.6 ± 0.9                     | 7.8 ± 0.7                     | 8.1 ± 0.7                     |
| terran_10_vs_11  | 5.9 ± 0.4                     | 6.4 ± 0.5                     | 5.8 ± 0.3                     | 5.9 ± 0.4                     | 5.7 ± 0.5                     | 5.8 ± 0.6                     |
| terran_20_vs_20  | 9.0 ± 0.6                     | 9.2 ± 0.6                     | 8.5 ± 0.7                     | 8.4 ± 0.6                     | 8.2 ± 0.6                     | 8.4 ± 0.7                     |
| terran_20_vs_23  | 5.6 ± 0.2                     | 5.6 ± 0.4                     | 5.3 ± 0.3                     | 5.1 ± 0.3                     | 5.1 ± 0.3                     | 5.1 ± 0.1                     |
| zerg_5_vs_5      | 7.3 ± 0.5                     | 7.5 ± 0.1                     | 7.2 ± 0.6                     | 6.8 ± 0.2                     | 6.4 ± 0.3                     | 6.4 ± 0.3                     |
| zerg_10_vs_10    | 9.7 ± 0.4                     | 10.2 ± 0.6                    | 9.2 ± 0.3                     | 9.2 ± 0.4                     | 8.7 ± 0.2                     | 8.9 ± 0.4                     |
| zerg_10_vs_11    | 9.0 ± 0.5                     | 9.4 ± 0.3                     | 8.5 ± 0.2                     | 8.8 ± 0.3                     | 8.7 ± 0.4                     | 8.3 ± 0.5                     |
| zerg_20_vs_20    | 9.0 ± 0.4                     | 10.2 ± 0.6                    | 9.0 ± 0.3                     | 9.1 ± 0.7                     | 8.8 ± 0.4                     | 8.9 ± 0.4                     |
| zerg_20_vs_23    | 8.9 ± 0.2                     | 9.5 ± 0.2                     | 8.8 ± 0.4                     | 8.9 ± 0.3                     | 8.5 ± 0.4                     | 8.6 ± 0.4                     |

```
In [143... pd_winrates_llm.map(lambda x: analyze_data(x, tag="winrates"))
```

Out[143...

|                  | MisoDICE<br>( $\alpha=0.00$ ) | MisoDICE<br>( $\alpha=0.05$ ) | MisoDICE<br>( $\alpha=0.10$ ) | MisoDICE<br>( $\alpha=0.50$ ) | MisoDICE<br>( $\alpha=1.00$ ) | MisoDICE<br>( $\alpha=10.0$ ) |
|------------------|-------------------------------|-------------------------------|-------------------------------|-------------------------------|-------------------------------|-------------------------------|
| 2c_vs_64zg       | 11.0 $\pm$ 5.8                | 13.0 $\pm$ 9.0                | 10.0 $\pm$ 5.0                | 9.3 $\pm$ 2.9                 | 7.1 $\pm$ 4.1                 | 1.7 $\pm$ 0.9                 |
| 5m_vs_6m         | 1.1 $\pm$ 1.0                 | 1.2 $\pm$ 0.5                 | 0.6 $\pm$ 0.4                 | 0.7 $\pm$ 0.4                 | 0.9 $\pm$ 0.7                 | 0.7 $\pm$ 0.5                 |
| 6h_vs_8z         | 1.0 $\pm$ 0.8                 | 1.1 $\pm$ 0.8                 | 1.1 $\pm$ 0.8                 | 0.8 $\pm$ 0.5                 | 0.4 $\pm$ 0.3                 | 1.0 $\pm$ 0.5                 |
| corridor         | 0.4 $\pm$ 0.2                 | 1.4 $\pm$ 0.6                 | 1.2 $\pm$ 0.5                 | 0.5 $\pm$ 0.4                 | 1.4 $\pm$ 0.7                 | 0.9 $\pm$ 0.4                 |
| protoss_5_vs_5   | 12.1 $\pm$ 1.6                | 20.7 $\pm$ 0.9                | 14.4 $\pm$ 2.1                | 12.9 $\pm$ 2.0                | 14.1 $\pm$ 2.2                | 17.2 $\pm$ 2.5                |
| protoss_10_vs_10 | 8.4 $\pm$ 3.3                 | 14.1 $\pm$ 2.1                | 9.9 $\pm$ 2.2                 | 9.5 $\pm$ 2.6                 | 9.0 $\pm$ 1.7                 | 11.1 $\pm$ 2.3                |
| protoss_10_vs_11 | 3.3 $\pm$ 1.1                 | 4.7 $\pm$ 0.3                 | 4.3 $\pm$ 0.4                 | 3.5 $\pm$ 1.3                 | 3.5 $\pm$ 1.1                 | 4.3 $\pm$ 1.2                 |
| protoss_20_vs_20 | 5.4 $\pm$ 0.4                 | 11.0 $\pm$ 3.2                | 5.5 $\pm$ 1.1                 | 6.4 $\pm$ 1.0                 | 6.4 $\pm$ 0.7                 | 7.8 $\pm$ 2.4                 |
| protoss_20_vs_23 | 4.3 $\pm$ 0.6                 | 3.8 $\pm$ 2.0                 | 2.3 $\pm$ 1.4                 | 3.5 $\pm$ 1.6                 | 3.3 $\pm$ 0.8                 | 2.5 $\pm$ 1.3                 |
| terran_5_vs_5    | 12.4 $\pm$ 2.9                | 14.2 $\pm$ 3.1                | 11.2 $\pm$ 0.8                | 12.1 $\pm$ 1.6                | 12.0 $\pm$ 3.2                | 12.2 $\pm$ 3.2                |
| terran_10_vs_10  | 9.3 $\pm$ 1.2                 | 12.0 $\pm$ 1.7                | 8.6 $\pm$ 1.9                 | 9.2 $\pm$ 3.6                 | 8.8 $\pm$ 1.9                 | 9.3 $\pm$ 3.2                 |
| terran_10_vs_11  | 2.3 $\pm$ 0.4                 | 4.2 $\pm$ 1.6                 | 3.5 $\pm$ 1.2                 | 2.3 $\pm$ 0.7                 | 2.2 $\pm$ 0.8                 | 3.6 $\pm$ 1.5                 |
| terran_20_vs_20  | 4.8 $\pm$ 1.6                 | 8.8 $\pm$ 1.5                 | 4.9 $\pm$ 1.5                 | 5.9 $\pm$ 2.5                 | 4.9 $\pm$ 1.9                 | 9.3 $\pm$ 2.1                 |
| terran_20_vs_23  | 1.5 $\pm$ 0.7                 | 1.8 $\pm$ 1.4                 | 1.2 $\pm$ 0.7                 | 1.8 $\pm$ 0.7                 | 1.2 $\pm$ 0.9                 | 1.7 $\pm$ 1.0                 |
| zerg_5_vs_5      | 7.1 $\pm$ 1.6                 | 7.9 $\pm$ 1.0                 | 7.4 $\pm$ 1.0                 | 5.9 $\pm$ 0.7                 | 6.4 $\pm$ 2.7                 | 7.5 $\pm$ 2.1                 |
| zerg_10_vs_10    | 6.7 $\pm$ 1.2                 | 8.9 $\pm$ 2.1                 | 7.2 $\pm$ 2.6                 | 7.0 $\pm$ 0.8                 | 7.1 $\pm$ 0.9                 | 6.9 $\pm$ 1.0                 |
| zerg_10_vs_11    | 5.0 $\pm$ 1.4                 | 6.8 $\pm$ 1.1                 | 5.0 $\pm$ 1.5                 | 4.1 $\pm$ 1.9                 | 5.0 $\pm$ 1.2                 | 4.5 $\pm$ 1.4                 |
| zerg_20_vs_20    | 1.3 $\pm$ 0.5                 | 2.4 $\pm$ 0.6                 | 1.2 $\pm$ 0.4                 | 1.7 $\pm$ 2.1                 | 1.6 $\pm$ 0.3                 | 2.6 $\pm$ 0.6                 |
| zerg_20_vs_23    | 1.4 $\pm$ 0.5                 | 2.7 $\pm$ 0.4                 | 1.0 $\pm$ 0.4                 | 2.5 $\pm$ 0.7                 | 2.7 $\pm$ 1.7                 | 2.1 $\pm$ 0.7                 |

In [144...

```
MAIN_ALGOS_TMP = ["bc_beta0.0", "bc_beta0.5", "bc_beta1.0", "indd", "vdn", "miso_alpha0.05"]
```

In [145...

```
def load_data_tmp(use_llm=False, exsize=200, algos=None):
    data_returns = defaultdict(lambda: defaultdict(lambda: defaultdict(list)))
    data_winrates = defaultdict(lambda: defaultdict(lambda: defaultdict(list)))
    if not algos:
        algos = ALGOS
    for algo in algos:
        for env_name in MAMUJOCO_ENV_NAMES + SMACV1_ENV_NAMES + SMACV2_ENV_NAMES:
            for seed in range(4):
                if use_llm:
                    if env_name in MAMUJOCO_ENV_NAMES:
                        continue
                    path = f"logs_ablation/{algo}/{env_name}_llm/seed{seed}/exsize{exsize}/results.json"
                else:
                    path = f"logs_ablation/{algo}/{env_name}/seed{seed}/exsize{exsize}/results.json"

                if algo == "omap1":
                    path = f"logs_ablation/{algo}/{env_name}_llm/seed{seed}/results.json"

                data = load_results(path)
                for step in range(101):
                    if step != 100:
                        continue
                    result = data[f"step_{step}"] if algo != "omap1" else data
                    if "returns" in result:
                        data_returns[algo][env_name][step].append(np.mean(result["returns"]))
                    if "winrates" in result:
                        data_winrates[algo][env_name][step].append(np.mean(result["winrates"]))
    return data_returns, data_winrates
```

In [146...

```
data_returns_llm, data_winrates_llm = load_data_tmp(use_llm=True, algos=MAIN_ALGOS_TMP)
pd_returns_llm = pd.DataFrame.from_dict(data_returns_llm).rename(columns=RENAME_ALGOS)
pd_winrates_llm = pd.DataFrame.from_dict(data_winrates_llm).rename(columns=RENAME_ALGOS)
```

In [147...

```
pd_returns_llm.map(analyze_data)
```

Out[147...

|                  | BC ( $\beta=0.0$ ) | BC ( $\beta=0.5$ ) | BC ( $\beta=1.0$ ) | INDD           | VDN            | MisoDICE (ours) |
|------------------|--------------------|--------------------|--------------------|----------------|----------------|-----------------|
| 2c_vs_64zg       | 11.7 $\pm$ 0.4     | 11.3 $\pm$ 0.1     | 13.1 $\pm$ 0.8     | 15.1 $\pm$ 1.3 | 15.9 $\pm$ 2.0 | 16.1 $\pm$ 1.8  |
| 5m_vs_6m         | 6.1 $\pm$ 1.4      | 6.8 $\pm$ 1.4      | 7.2 $\pm$ 0.2      | 7.4 $\pm$ 0.2  | 7.4 $\pm$ 0.3  | 7.4 $\pm$ 0.1   |
| 6h_vs_8z         | 8.4 $\pm$ 0.1      | 8.4 $\pm$ 0.2      | 8.3 $\pm$ 0.3      | 8.2 $\pm$ 0.3  | 8.5 $\pm$ 0.1  | 8.9 $\pm$ 0.1   |
| corridor         | 2.1 $\pm$ 0.3      | 1.9 $\pm$ 0.3      | 5.7 $\pm$ 1.5      | 2.0 $\pm$ 0.2  | 5.8 $\pm$ 1.5  | 6.1 $\pm$ 1.6   |
| protoss_5_vs_5   | 13.3 $\pm$ 0.1     | 12.6 $\pm$ 2.8     | 12.0 $\pm$ 1.2     | 11.9 $\pm$ 1.9 | 13.3 $\pm$ 0.5 | 13.7 $\pm$ 1.2  |
| protoss_10_vs_10 | 13.1 $\pm$ 0.9     | 12.5 $\pm$ 1.4     | 12.8 $\pm$ 0.9     | 12.3 $\pm$ 0.8 | 13.2 $\pm$ 0.5 | 14.0 $\pm$ 1.2  |
| protoss_10_vs_11 | 10.8 $\pm$ 1.3     | 10.6 $\pm$ 0.9     | 10.9 $\pm$ 0.8     | 10.1 $\pm$ 1.1 | 11.4 $\pm$ 0.5 | 12.0 $\pm$ 1.3  |
| protoss_20_vs_20 | 12.4 $\pm$ 1.4     | 12.2 $\pm$ 0.5     | 13.0 $\pm$ 0.4     | 12.7 $\pm$ 0.6 | 13.3 $\pm$ 1.4 | 13.9 $\pm$ 1.6  |
| protoss_20_vs_23 | 10.1 $\pm$ 1.5     | 9.5 $\pm$ 0.5      | 10.2 $\pm$ 0.8     | 10.1 $\pm$ 0.9 | 10.4 $\pm$ 0.8 | 10.5 $\pm$ 1.1  |
| terran_5_vs_5    | 8.9 $\pm$ 0.9      | 8.4 $\pm$ 1.0      | 8.7 $\pm$ 0.9      | 8.9 $\pm$ 1.8  | 9.4 $\pm$ 2.3  | 9.4 $\pm$ 1.5   |
| terran_10_vs_10  | 7.5 $\pm$ 1.0      | 8.2 $\pm$ 1.0      | 7.7 $\pm$ 1.2      | 7.9 $\pm$ 0.7  | 8.9 $\pm$ 1.3  | 9.0 $\pm$ 0.6   |
| terran_10_vs_11  | 6.3 $\pm$ 0.4      | 5.9 $\pm$ 1.4      | 5.8 $\pm$ 0.4      | 5.9 $\pm$ 0.7  | 7.1 $\pm$ 1.2  | 7.3 $\pm$ 1.0   |
| terran_20_vs_20  | 8.6 $\pm$ 1.2      | 8.3 $\pm$ 0.8      | 7.9 $\pm$ 0.2      | 8.3 $\pm$ 1.0  | 8.7 $\pm$ 1.0  | 9.3 $\pm$ 1.2   |
| terran_20_vs_23  | 5.1 $\pm$ 0.2      | 5.5 $\pm$ 0.5      | 5.4 $\pm$ 0.3      | 4.8 $\pm$ 0.4  | 5.6 $\pm$ 0.5  | 5.9 $\pm$ 0.7   |
| zerg_5_vs_5      | 7.8 $\pm$ 1.2      | 7.0 $\pm$ 0.9      | 7.1 $\pm$ 1.4      | 6.8 $\pm$ 0.3  | 7.8 $\pm$ 0.8  | 8.0 $\pm$ 0.6   |
| zerg_10_vs_10    | 8.7 $\pm$ 1.2      | 8.2 $\pm$ 0.5      | 9.2 $\pm$ 0.8      | 9.6 $\pm$ 1.2  | 9.6 $\pm$ 1.7  | 9.9 $\pm$ 0.5   |
| zerg_10_vs_11    | 9.6 $\pm$ 0.4      | 9.3 $\pm$ 1.5      | 8.8 $\pm$ 1.2      | 9.3 $\pm$ 1.0  | 9.8 $\pm$ 0.9  | 9.9 $\pm$ 0.9   |
| zerg_20_vs_20    | 9.2 $\pm$ 0.8      | 9.3 $\pm$ 0.6      | 9.4 $\pm$ 1.1      | 9.2 $\pm$ 0.7  | 9.5 $\pm$ 0.8  | 11.1 $\pm$ 1.3  |
| zerg_20_vs_23    | 9.2 $\pm$ 1.1      | 8.9 $\pm$ 0.5      | 8.2 $\pm$ 0.6      | 9.3 $\pm$ 1.0  | 9.5 $\pm$ 0.3  | 9.5 $\pm$ 0.1   |

In [148...

```
pd_winrates_llm.map(lambda x: analyze_data(x, tag="winrates"))
```

Out[148...

|                  | BC ( $\beta=0.0$ ) | BC ( $\beta=0.5$ ) | BC ( $\beta=1.0$ ) | INDD           | VDN            | MisoDICE (ours) |
|------------------|--------------------|--------------------|--------------------|----------------|----------------|-----------------|
| 2c_vs_64zg       | 1.6 $\pm$ 1.6      | 0.0 $\pm$ 0.0      | 5.5 $\pm$ 2.6      | 9.4 $\pm$ 2.2  | 10.2 $\pm$ 7.1 | 11.7 $\pm$ 8.1  |
| 5m_vs_6m         | 0.8 $\pm$ 1.4      | 1.6 $\pm$ 1.6      | 0.8 $\pm$ 1.4      | 0.8 $\pm$ 1.4  | 1.6 $\pm$ 1.6  | 1.6 $\pm$ 1.6   |
| 6h_vs_8z         | 0.0 $\pm$ 0.0      | 0.8 $\pm$ 1.4      | 0.0 $\pm$ 0.0      | 0.0 $\pm$ 0.0  | 1.6 $\pm$ 1.6  | 2.3 $\pm$ 2.6   |
| corridor         | 0.8 $\pm$ 1.4      | 0.8 $\pm$ 1.4      | 0.8 $\pm$ 1.4      | 0.8 $\pm$ 1.4  | 1.6 $\pm$ 2.7  | 2.3 $\pm$ 2.6   |
| protoss_5_vs_5   | 13.3 $\pm$ 3.4     | 17.2 $\pm$ 8.4     | 20.3 $\pm$ 4.7     | 17.2 $\pm$ 3.5 | 20.3 $\pm$ 6.8 | 21.1 $\pm$ 11.6 |
| protoss_10_vs_10 | 10.2 $\pm$ 3.4     | 10.2 $\pm$ 3.4     | 8.6 $\pm$ 6.0      | 6.2 $\pm$ 2.2  | 10.2 $\pm$ 2.6 | 15.6 $\pm$ 4.4  |
| protoss_10_vs_11 | 1.6 $\pm$ 1.6      | 3.9 $\pm$ 1.4      | 3.1 $\pm$ 3.1      | 4.7 $\pm$ 3.5  | 4.7 $\pm$ 1.6  | 6.2 $\pm$ 2.2   |
| protoss_20_vs_20 | 8.6 $\pm$ 6.4      | 2.3 $\pm$ 2.6      | 9.4 $\pm$ 2.2      | 7.0 $\pm$ 7.8  | 9.4 $\pm$ 2.2  | 10.9 $\pm$ 5.2  |
| protoss_20_vs_23 | 2.3 $\pm$ 2.6      | 1.6 $\pm$ 1.6      | 1.6 $\pm$ 1.6      | 2.3 $\pm$ 1.4  | 3.1 $\pm$ 3.8  | 3.9 $\pm$ 5.1   |
| terran_5_vs_5    | 10.9 $\pm$ 3.5     | 7.0 $\pm$ 4.1      | 9.4 $\pm$ 3.8      | 11.7 $\pm$ 4.1 | 16.4 $\pm$ 7.5 | 17.2 $\pm$ 8.4  |
| terran_10_vs_10  | 8.6 $\pm$ 2.6      | 7.0 $\pm$ 4.1      | 7.8 $\pm$ 3.5      | 5.5 $\pm$ 2.6  | 9.4 $\pm$ 3.8  | 10.9 $\pm$ 3.5  |
| terran_10_vs_11  | 1.6 $\pm$ 1.6      | 1.6 $\pm$ 2.7      | 2.3 $\pm$ 1.4      | 1.6 $\pm$ 2.7  | 4.7 $\pm$ 3.5  | 5.5 $\pm$ 2.6   |
| terran_20_vs_20  | 7.0 $\pm$ 2.6      | 6.2 $\pm$ 2.2      | 4.7 $\pm$ 3.5      | 4.7 $\pm$ 1.6  | 8.6 $\pm$ 5.1  | 9.4 $\pm$ 2.2   |
| terran_20_vs_23  | 0.8 $\pm$ 1.4      | 0.0 $\pm$ 0.0      | 1.6 $\pm$ 2.7      | 0.8 $\pm$ 1.4  | 1.6 $\pm$ 1.6  | 2.3 $\pm$ 1.4   |
| zerg_5_vs_5      | 6.2 $\pm$ 2.2      | 5.5 $\pm$ 1.4      | 3.9 $\pm$ 2.6      | 6.2 $\pm$ 3.8  | 7.0 $\pm$ 4.6  | 7.8 $\pm$ 4.7   |
| zerg_10_vs_10    | 7.8 $\pm$ 2.7      | 5.5 $\pm$ 3.4      | 5.5 $\pm$ 4.6      | 3.1 $\pm$ 2.2  | 8.6 $\pm$ 6.8  | 8.6 $\pm$ 8.1   |
| zerg_10_vs_11    | 3.9 $\pm$ 1.4      | 4.7 $\pm$ 3.5      | 0.8 $\pm$ 1.4      | 3.9 $\pm$ 2.6  | 8.6 $\pm$ 3.4  | 8.6 $\pm$ 4.6   |
| zerg_20_vs_20    | 1.6 $\pm$ 2.7      | 1.6 $\pm$ 1.6      | 0.8 $\pm$ 1.4      | 0.0 $\pm$ 0.0  | 3.9 $\pm$ 2.6  | 2.3 $\pm$ 2.6   |
| zerg_20_vs_23    | 0.8 $\pm$ 1.4      | 1.6 $\pm$ 1.6      | 1.6 $\pm$ 1.6      | 0.0 $\pm$ 0.0  | 1.6 $\pm$ 2.7  | 1.6 $\pm$ 2.7   |
