# Supplementary material
Source: ML conference proceedings conference paper supplement (https://openreview.net/forum?id=krG6UHAvYr)
Supplement: supplementary_material [file Neurips_2025__MisoDICE_supplementary.pdf › Neurips_2025__MisoDICE_supplementary.pdf]

---

# MisoDICE: Multi-Agent Imitation from Unlabeled Mixed-Quality Demonstrations

---

Anonymous Author(s)

Affiliation

Address

email

## Abstract

1 We study offline imitation learning (IL) in cooperative multi-agent settings, where  
2 demonstrations have *unlabeled mixed quality* — containing both expert and sub-  
3 optimal trajectories. Our proposed solution is structured in two stages: trajectory  
4 labeling and multi-agent imitation learning, designed jointly to enable effective  
5 learning from heterogeneous, unlabeled data. In the first stage, we combine ad-  
6 vances in large language models and preference-based reinforcement learning to  
7 construct a progressive labeling pipeline that distinguishes expert-quality trajec-  
8 tories. In the second stage, we introduce MisoDICE, a novel multi-agent IL algorithm  
9 that leverages these labels to learn robust policies while addressing the compu-  
10 tational complexity of large joint state-action spaces. By extending the popular  
11 single-agent DICE framework to multi-agent settings with a new value decompo-  
12 sition and mixing architecture, our method yields a convex policy optimization  
13 objective and ensures consistency between global and local policies. We evaluate  
14 MisoDICE on multiple standard multi-agent RL benchmarks and demonstrate  
15 superior performance, especially when expert data is scarce.

## 16 1 Introduction

17 Imitation Learning (IL) is a key subfield of Reinforcement Learning (RL) that focuses on learning  
18 effective policies solely from expert demonstration data, without requiring direct access to reward  
19 functions [60]. A broad range of IL algorithms have been developed — primarily for single-agent  
20 settings — ranging from simple supervised learning methods like Behavior Cloning (BC) [41, 45] to  
21 more advanced occupancy-matching techniques [16, 18, 23]. While these methods typically assume  
22 access to high-quality expert demonstrations, recent research has extended single-agent IL to more  
23 challenging scenarios involving limited or suboptimal data [4, 8, 28, 65].

24 Motivated by the success of single-agent IL, recent studies have sought to extend IL to multi-  
25 agent settings characterized by complex inter-agent dynamics. For example, leading multi-agent IL  
26 algorithms have adapted well-known single-agent approaches [16, 18, 23] by incorporating game-  
27 theoretic concepts such as Nash equilibrium for competitive scenarios [51, 59], or by carefully  
28 decomposing joint policies into local policies in cooperative tasks [36]. A key limitation of these  
29 methods is their reliance on large volumes of expert data to learn effective policies. In practice,  
30 acquiring such comprehensive datasets in complex multi-agent environments is highly impractical,  
31 due to the combinatorial explosion of joint state-action spaces as the number of agents increases.

32 Our work tackles a new highly challenging problem of offline multi-agent IL using *only unlabeled*  
33 *demonstrations of mixed quality* (i.e., containing both expert and sub-optimal trajectories). To the  
34 best of our knowledge, this is the first effort to address such a practical yet underexplored setting in  
35 multi-agent IL. Our proposed solution is structured into two key stages: data labeling and multi-agent  
36 IL, that work together to enable effective learning from heterogeneous unlabeled data.

The first stage, named *multi-step data labeling*, combines recent advances in LLMs and preference-based RL to build a progressive trajectory labeling pipeline. We begin by leveraging LLM-generated feedback to produce initial preference annotations between pairs of trajectories from the unlabeled dataset. While LLMs can offer valuable insights, their judgments are error-prone in the complex, high-dimensional dynamics of multi-agent environments. To refine this coarse feedback, we introduce a second step using O-MAPL, a leading preference-based MARL algorithm [6]. O-MAPL trains a soft Q-function based on the initial LLM preferences, capturing a more grounded notion of demonstration quality. We then re-purpose this Q-function to extract reward signals and re-rank trajectories, enabling more accurate separation of expert and suboptimal data. This ranking lays the foundation for more effective and data-efficient multi-agent IL in our subsequent learning stage.

The second stage, the algorithmic core of our proposed framework, focuses on designing a novel multi-agent IL algorithm, MisoDICE, capable of effectively leveraging the labeled demonstrations (expert vs. non-expert) to learn robust policies. MisoDICE follows an occupancy-matching principle, minimizing the divergence between the learned and behavior policies within a mixed-quality dataset. To manage the exponential complexity in multi-agent environments, we build on the established Centralized Training with Decentralized Execution (CTDE) paradigm. However, MisoDICE significantly differs from prior CTDE-based learning methods by introducing customized learning objectives and constraints that are suited to the challenges of mixed-quality demonstrations. Furthermore, MisoDICE features a unique value decomposition strategy and is supported by a theoretical analysis establishing local-global optimality consistency. Specifically, we show that under our value factorization strategy, the global learning objective is convex, which ensures both stability and efficiency during training. Moreover, we prove that once the value function is learned, each agent’s local policy can be optimized independently and in parallel, while still guaranteeing convergence to the globally optimal joint policy. We also derive a closed-form mathematical relationship between the local policies and the value function, offering deeper insight into the structure and characteristics of the learned solution.

Finally, we conduct extensive experiments with comprehensive ablation studies on challenging multi-agent environments, i.e., SMACv1 [46], and SMACv2 [12]. The results show that our MisoDICE outperforms all baselines, highlighting the benefit of its integrated approach, combining occupancy matching, value decomposition, and effective use of the multi-step labeling process.

## 2 Related Work

**Imitation Learning (IL).** The well-known behavioral cloning (BC) frames IL as a supervised learning problem by maximizing the likelihood of expert state-action pairs under the learned policy [41, 45]. However, BC disregards environment dynamics, leading to compounding errors due to distributional shift. Recent methods recover the expert’s reward function (explicitly or implicitly) so that the learned policy can account for such dynamics [14, 16, 23, 29, 43]. Notable examples include distribution-matching-based GAIL and AIRL algorithms [16, 23], alternatively optimizing policy and reward functions via an adversarial learning process, which requires access to on-policy data. In contrast, ValueDice [29] introduces an off-policy divergence objective to align state-action occupancies, enabling fully offline training. IQ-Learn [18] bypasses reward recovery by directly learning the Q-function, leading to more stable policy learning than adversarial methods. Beyond these, other research addresses practical challenges in single-agent environments such as limited [65] or imperfect demonstrations [4, 8, 28], and constrained IL [47]. Additional directions include model-based IL [2, 61, 63] and the use of diffusion models to improve policy learning from demonstrations [30, 54]. While many works focus on single-agent settings, only few studies have explored IL in multi-agent environments, whether cooperative [3, 5, 31, 36, 52] or competitive [33, 44, 51, 59], primarily due to the complex nature of multi-agent interactions. Some adapt single-agent methods like GAIL and AIRL to multi-agent settings using game-theoretic concepts [51, 59], but they inherit instability issues from adversarial training. A recent algorithm, MIFQ [36], extends IQ-Learn [18] to the multi-agent setting under the CTDE paradigm, which achieves outstanding performance in multi-agent IL scenarios. Unlike existing multi-agent IL methods that rely on high-quality expert data, we address a more challenging setting with only unlabeled demonstrations of various quality are available.

**Preference-based Reinforcement Learning (PbRL).** PbRL is an emerging subfield of RL that can train policies only using preference data, typically in the form of pairwise trajectory comparisons. Most existing PbRL methods follow a two-phase approach: first, a reward function is learned via supervised learning techniques (e.g., using the Bradley-Terry model), and then RL is applied to

optimize the policy accordingly [9, 10, 17, 22, 32, 24, 27, 37, 64]. However, this separation introduces an additional learning component atop already complex RL algorithms, resulting in high variance and instability during training. To mitigate this issue, recent works proposed end-to-end methods that learn policies directly from preferences, using contrastive learning [1, 20], information matching [26], or Q-function optimization [21], resulting in greater stability and performance. Following advances in single-agent PbRL, recent works have extended it to multi-agent settings [6, 25, 62], with O-MAPL [6] achieving state-of-the-art results on challenging multi-agent benchmarks. Our work uses LLM-generated feedback to produce initial preference data, which is then used to train a soft Q-function via O-MAPL. We treat O-MAPL as a label-refinement step by extracting reward signals from its Q-function to partition the unlabeled data into expert and non-expert trajectories.

**Centralized Training with Decentralized Execution (CTDE).** CTDE is a well-known learning paradigm in MARL in which global information are leveraged for an efficient training of joint value functions [15, 34, 42, 53] while allowing agents to operate independently based on their local observations. There are various MARL algorithms exploring different value decomposition strategies under CTDE. For example, QMIX [42] offers an advanced value decomposition method based on mixing and hyper-network concepts [19]. Others such as QTRAN [50] and QPLEX [55], introduce new factorization methods which are more expressive than QMIX. Besides these value-based methods, there are policy gradient based MARL algorithms [35, 58] which are extensions of the PPO algorithm [48]. Building on the success of CTDE in MARL, this paradigm has been extended to multi-agent IL [16, 23, 36], preference-based RL [6, 25, 62], and offline MARL [38, 40, 49, 56, 57]. Our multi-agent IL algorithm adopts the DICE approach to learn effective policies from mixed-quality data within the CTDE framework. Despite operating under the same CTDE framework, existing methods — including ours — differ notably in learning objectives, constraints, value decomposition strategies, and theoretical guarantees, each tailored to their specific problem settings.

### 3 Preliminaries

Our work focuses on cooperative MARL, modeled as a multi-agent Partially Observable Markov Decision Process (POMDP):  $\mathcal{M} = \langle \mathcal{S}, \mathcal{A}, P, r, \mathcal{Z}, \mathcal{O}, n, \mathcal{N}, \gamma \rangle$  where  $n$  is the number of agents and  $\mathcal{N} = \{1, \dots, n\}$  is the agent set. The environment has the global state space  $\mathcal{S}$ , and the joint action space is  $\mathcal{A} = \prod_{i \in \mathcal{N}} \mathcal{A}_i$ , where  $\mathcal{A}_i$  is the set of actions for agent  $i$ . At each time step, each agent  $i$  selects an action  $a_i \in \mathcal{A}_i$ , forming a joint action  $\mathbf{a} = (a_1, a_2, \dots, a_n) \in \mathcal{A}$ . The transition dynamics are governed by  $\mathcal{T}(\mathbf{s}' | \mathbf{s}, \mathbf{a}) : \mathcal{S} \times \mathcal{A} \times \mathcal{S} \rightarrow [0, 1]$ , which is the probability of transitioning to global state  $\mathbf{s}'$  from state  $\mathbf{s}$  under action  $\mathbf{a}$ . Finally,  $\gamma \in [0, 1]$  is the discounting factor. We also define the *occupancy measure* of a joint policy  $\pi_{\text{tot}}$  as  $\rho^{\pi_{\text{tot}}}(\mathbf{s}, \mathbf{a}) = (1 - \gamma) \sum_{t=0}^{\infty} \gamma^t P(\mathbf{s}_t = \mathbf{s}, \mathbf{a}_t = \mathbf{a} | \pi_{\text{tot}})$ , which is the discounted visitation distribution over state-action pairs when following  $\pi_{\text{tot}}$ .

In a partially observable setting, each agent receives a local observation  $o_i \in \mathcal{O}_i$  via an observation function  $\mathcal{Z}_i(\mathbf{s}) : \mathcal{S} \rightarrow \mathcal{O}_i$ , and the joint observation is  $\mathbf{o} = (o_1, o_2, \dots, o_n)$ . In practice, the global state  $\mathbf{s}$  is not directly accessible and is instead represented by the joint observation  $\mathbf{o} = \mathcal{Z}(\mathbf{s})$ . For notational simplicity, we use  $\mathbf{s}$  in our formulation, but it refers to  $\mathbf{o}$  in implementation.

In cooperative MARL, all agents share a global reward function  $r(\mathbf{s}, \mathbf{a}) : \mathcal{S} \times \mathcal{A} \rightarrow \mathbb{R}$ . The objective is to learn a joint policy  $\pi_{\text{tot}} = \{\pi_1, \dots, \pi_n\}$  that maximizes the expected discounted return:

$$\mathbb{E}_{\{\mathbf{s}_t, \mathbf{a}_t\}_t \sim \pi_{\text{tot}}} \left[ \sum_{t=0}^{\infty} \gamma^t r(\mathbf{s}_t, \mathbf{a}_t) \right].$$

In offline MARL, learning is performed solely based on a fixed offline dataset  $\mathcal{D}$ , collected from a behavior policy  $\mu_{\text{tot}} = \{\mu_1, \dots, \mu_n\}$ . In offline multi-agent IL, the reward function is not available. Instead, a set of expert demonstrations is provided, and the goal is to recover both the global and local expert policies accordingly. A common objective is to minimize the divergence between the stationary distribution induced by the learned policy and that of the expert demonstrations:

$$\pi_{\text{tot}}^* = \operatorname{argmin}_{\pi_{\text{tot}}} D_{\text{KL}}(\rho_{\text{tot}}^{\pi_{\text{tot}}} \| \rho_{\text{tot}}^E), \quad (1)$$

where  $\rho_{\text{tot}}^{\pi_{\text{tot}}}$  denotes the global state-action visitation distribution under the learned policy  $\pi_{\text{tot}}$ , and  $\rho_{\text{tot}}^E$  denotes the corresponding distribution derived from expert demonstrations.

The DICE framework has been widely adopted to address training objectives involving KL divergence between stationary distributions (e.g., Eq. (1)). The core idea is to formulate IL as a constrained optimization program over occupancy measures. In a later section, we extend this approach by integrating DICE with value decomposition for efficient offline multi-agent IL.

## 4 Unlabeled Demonstrations: Multi-Step Labeling Procedure via LLMs

Addressing multi-agent IL from unlabeled demonstrations of mixed quality requires a robust procedure to identify high-quality, expert-like behaviors within the dataset. We propose a multi-step data labeling pipeline designed to progressively refine trajectory quality assessments and partition the unlabeled dataset ( $\mathcal{D}_{unlabeled}$ ) into expert ( $\mathcal{D}^E$ ) and non-expert segments ( $\mathcal{D}^{Mix}$ ). This process serves as the first crucial stage of our MisoDICE framework for subsequent efficient IL.

The initial step in this procedure involves generating preference data. A set of trajectory pairs ( $N_p$ ) is randomly sampled from  $\mathcal{D}_{unlabeled}$ . An LLM (e.g., GPT-4o) is then prompted to provide preference labels for these pairs, based on high-level semantic features and game context, such as unit health, positions, and actions in SMAC environments. This yields an initial preference dataset  $\mathcal{P}$ . While LLMs offer valuable insights, their judgments in complex multi-agent settings can be error-prone.

The next step is preference-based reward recovery. The preference dataset  $\mathcal{P}$  is used to train an offline preference-based MARL algorithm, i.e., the leading O-MAPL [6]. O-MAPL learns a soft Q-function (and corresponding value function V) directly from these preferences, capturing a more grounded notion of demonstration quality compared to raw LLM feedback. After training O-MAPL, an underlying reward function  $R(s, a)$  is recovered for all state-action pairs in  $\mathcal{D}_{unlabeled}$ . This recovery utilizes the relationship  $R \approx Q - \gamma V$ , adapted from MaxEnt RL principles.

Using the recovered rewards, we compute the total return  $G(\sigma) = \sum_{(s,a) \in \sigma} R(s, a)$  for each trajectory  $\sigma$  in  $\mathcal{D}_{unlabeled}$  and rank them accordingly. The top- $K_{expert}$  trajectories are selected to form the expert dataset  $\mathcal{D}^E$  and the remaining trajectories form the suboptimal dataset  $\mathcal{D}^{Mix}$ . These datasets are used in the subsequent multi-agent IL phase (Phase 2 of MisoDICE).

This multi-step labeling process enables MisoDICE to leverage unlabeled, mixed-quality demonstrations by inferring demonstration quality through preference learning and using it to guide imitation learning. The use of LLMs for initial preference generation, followed by refinement with O-MAPL, offers a powerful mechanism for identifying expert behavior without prior annotations.

## 5 Multi-Agent Imitation Learning from Mixed-Quality Demonstrations

### 5.1 Distribution Matching Based Formulation

Our goal is to leverage two datasets (as a result of our Phase 1): (1) a limited *expert dataset*,  $\mathcal{D}^E$ ; and (2) a large *suboptimal dataset*,  $\mathcal{D}^{Mix}$  to learn global and local policies that closely imitate the expert behavior. We first formulate the DICE-based learning objective as a function of the global joint policy  $\pi_{tot}$  for multi-agent IL in a similar fashion as prior work [28] for single-agent IL:

$$\min_{\pi_{tot}} D_{KL}(\rho_{tot}^{\pi} \parallel \rho_{tot}^E) + \alpha D_{KL}(\rho_{tot}^{\pi} \parallel \rho_{tot}^U), \quad (2)$$

where  $\rho_{tot}^E$  and  $\rho_{tot}^U$  denote the global state-action stationary distributions induced by the expert dataset  $\mathcal{D}^E$  and the union dataset  $\mathcal{D}^U = \mathcal{D}^E \cup \mathcal{D}^{Mix}$ , respectively. The hyperparameter  $\alpha \geq 0$  controls the influence of the suboptimal data in the learning objective.

We can reformulate (2) as a constrained optimization problem over the occupancy measure  $\rho_{tot}^{\pi}$ :

$$\min_{\{\rho_{tot}^{\pi}(s,a) \geq 0\}} \sum_{s,a} \rho_{tot}^{\pi}(s,a) \log \frac{\rho_{tot}^{\pi}(s,a)}{\rho_{tot}^E(s,a)} + \alpha \rho_{tot}^{\pi}(s,a) \log \frac{\rho_{tot}^{\pi}(s,a)}{\rho_{tot}^U(s,a)} \quad (3)$$

$$\text{s.t.} \quad \sum_a \rho_{tot}^{\pi}(s,a) = (1-\gamma)P_0(s) + \gamma \sum_{s',a'} \mathcal{T}(s|s',a') \rho_{tot}^{\pi}(s',a'), \quad \forall s \in \mathcal{S} \quad (4)$$

Constraint (4) enforces the Bellman flow condition, ensuring that  $\rho_{tot}^{\pi}$  corresponds to a valid state-action visitation distribution. The objective in (3) is convex in  $\rho_{tot}^{\pi}(s,a)$ . Thus we can incorporate the flow constraints into (3) using Lagrangian duality, resulting in the following saddle-point formulation:

$$\max_{\nu^{\text{tot}}} \min_{\rho_{tot}^{\pi} \geq 0} \{ \mathcal{L}(\nu^{\text{tot}}, \rho_{tot}^{\pi}) \},$$

where  $\nu^{\text{tot}}$  are Lagrange multipliers corresponding to the Bellman flow constraints, and the objective

$$\begin{aligned} \mathcal{L}(\nu^{\text{tot}}, \rho_{tot}^{\pi}) = & \sum_{s,a} \rho_{tot}^{\pi}(s,a) \log \frac{\rho_{tot}^{\pi}(s,a)}{\rho_{tot}^E(s,a)} + \alpha \rho_{tot}^{\pi}(s,a) \log \frac{\rho_{tot}^{\pi}(s,a)}{\rho_{tot}^U(s,a)} \\ & + \sum_s \nu^{\text{tot}}(s) \left( (1-\gamma)P_0(s) + \gamma \sum_{s',a'} \mathcal{T}(s|s',a') \rho_{tot}^{\pi}(s',a') - \sum_a \rho_{tot}^{\pi}(s,a) \right) \end{aligned} \quad (5)$$

182 which can be simplified to a function of  $(\nu^{\text{tot}}, w^{\text{tot}})$  as follows:

$$\mathcal{L}(\nu^{\text{tot}}, w^{\text{tot}}) = (1 - \gamma) \mathbb{E}_{\mathbf{s} \sim P_0} [\nu^{\text{tot}}(\mathbf{s})] + \mathbb{E}_{(\mathbf{s}, \mathbf{a}) \sim \rho_{\text{tot}}^U} [w^{\text{tot}}(\mathbf{s}, \mathbf{a}) (A_{\nu}^{\text{tot}}(\mathbf{s}, \mathbf{a}) - (1 + \alpha) \log(w^{\text{tot}}(\mathbf{s}, \mathbf{a})))]$$

where  $A_{\nu}^{\text{tot}}(\mathbf{s}, \mathbf{a}) = \log \frac{\rho_{\text{tot}}^E(\mathbf{s}, \mathbf{a})}{\rho_{\text{tot}}^U(\mathbf{s}, \mathbf{a})} + \gamma \sum_{\mathbf{s}'} \mathcal{T}(\mathbf{s}' | \mathbf{s}, \mathbf{a}) \nu^{\text{tot}}(\mathbf{s}') - \nu^{\text{tot}}(\mathbf{s})$  and  $w^{\text{tot}}(\mathbf{s}, \mathbf{a}) = \frac{\rho_{\text{tot}}^{\pi}(\mathbf{s}, \mathbf{a})}{\rho_{\text{tot}}^U(\mathbf{s}, \mathbf{a})}$

183 Details of this derivation, adapted to the multi-agent setting from the single-agent IL in [28], can be  
 184 found in our appendix. Here,  $\nu^{\text{tot}}(\mathbf{s})$  can be interpreted as the value function at the global state  $\mathbf{s}$ . The  
 185 reformulation above enables us to express the training objective as an optimization problem over  $\nu^{\text{tot}}$   
 186 and  $w^{\text{tot}}$  in which the objective  $\mathcal{L}(\nu^{\text{tot}}, w^{\text{tot}})$  is linear in  $\nu^{\text{tot}}$  and convex in  $w^{\text{tot}}$ . Moreover, the inner  
 187 problem  $\max_{w^{\text{tot}}} \mathcal{L}(\nu^{\text{tot}}, w^{\text{tot}})$  admits a closed-form solution, allowing the original minimax objective  
 188 to be reduced to the following non-adversarial minimization problem over  $\nu^{\text{tot}}$ :

$$\max_{w^{\text{tot}}} \mathcal{L}(\nu^{\text{tot}}, w^{\text{tot}}) = \mathcal{L}(\nu^{\text{tot}}, w_{\nu}^*) \text{ where } w_{\nu}^* = \exp \left( \frac{A_{\nu}^{\text{tot}}(\mathbf{s}, \mathbf{a})}{1 + \alpha} - 1 \right)$$

## 189 5.2 Value Factorization

190 The objective  $\mathcal{L}(\nu^{\text{tot}}, w_{\nu}^*)$  is generally intractable in the multi-agent setting due to the high dimension-  
 191 ality of the joint state and action space. To address this, we adopt a value factorization technique in  
 192 which the global  $\nu^{\text{tot}}$  is decomposed into local value functions using a mixing network. Specifically,  
 193 let  $\boldsymbol{\nu}(\mathbf{s}) = \{\nu_i(s_i)\}_{i \in \mathcal{N}}$  be the set of local value functions. We introduce a mixing network  $\mathcal{M}_{\phi}$ ,  
 194 parameterized by  $\phi$ , which aggregates the local values to form the global value function:

$$\nu^{\text{tot}}(\mathbf{s}) = \mathcal{M}_{\phi}[\boldsymbol{\nu}(\mathbf{s})].$$

195 To implement  $\mathcal{M}_{\phi}$ , we adopt a linear structure (e.g., a single-layer network) due to: (i) it preserves  
 196 convexity in the learning objective within the value function space, leading to stable and consistent  
 197 training; and (ii) nonlinear mixing networks (e.g., a two-layer network with ReLU activations), partic-  
 198 ularly in offline settings with limited data, are prone to overfitting and have unstable performance [7].

199 Under the mixing architecture described above, the training objective becomes:

$$\mathcal{L}(\phi, \boldsymbol{\nu}) = (1 - \gamma) \mathbb{E}_{\mathbf{s} \sim P_0} [\mathcal{M}_{\phi}[\boldsymbol{\nu}(\mathbf{s})]] + \mathbb{E}_{(\mathbf{s}, \mathbf{a}) \sim \rho_{\text{tot}}^U} [w_{\nu}^*(\mathbf{s}, \mathbf{a}) (A_{\nu}^{\text{tot}}(\mathbf{s}, \mathbf{a}) - (1 + \alpha) \log w_{\nu}^*(\mathbf{s}, \mathbf{a}))], \quad (6)$$

200 where the total advantage function  $A_{\nu}^{\text{tot}}$  and the optimal weighting function  $w_{\nu}^*$  are defined as:

$$A_{\nu}^{\text{tot}}(\mathbf{s}, \mathbf{a}) = \log \frac{\rho_{\text{tot}}^E(\mathbf{s}, \mathbf{a})}{\rho_{\text{tot}}^U(\mathbf{s}, \mathbf{a})} + \gamma \sum_{\mathbf{s}'} \mathcal{T}(\mathbf{s}' | \mathbf{s}, \mathbf{a}) \mathcal{M}_{\phi}[\boldsymbol{\nu}(\mathbf{s}')] - \mathcal{M}_{\phi}[\boldsymbol{\nu}(\mathbf{s})], \quad (7)$$

$$w_{\nu}^*(\mathbf{s}, \mathbf{a}) = \exp \left( \frac{A_{\nu}^{\text{tot}}(\mathbf{s}, \mathbf{a})}{1 + \alpha} - 1 \right). \quad (8)$$

201 **Proposition 5.1.** *If the mixing network  $\mathcal{M}_{\phi}[\boldsymbol{\nu}(\mathbf{s})]$  is a linear function of both  $\boldsymbol{\nu}(\mathbf{s})$  and  $\phi$ , then the*  
 202 *training objective  $\mathcal{L}(\phi, \boldsymbol{\nu})$  is convex in both  $\phi$  and  $\boldsymbol{\nu}$ .*

203 As a result, if the mixing network is constructed as a linear combination of local value functions,  
 204 i.e.,  $\mathcal{M}_{\phi}[\boldsymbol{\nu}(\mathbf{s})] = \sum_{i \in \mathcal{N}} \phi_i \nu_i(s_i) + \phi_0$ , where  $\phi = \{\phi_0, \phi_1, \dots, \phi_n\}$  are learnable parameters, then  
 205 the global value function is linear in both the parameters  $\phi_i$  and the local value outputs  $\nu_i(s_i)$ . This  
 206 structural property is critical for stable and efficient optimization, as it guarantees that the learning  
 207 objective preserves convexity w.r.t both the policy parameters and the mixing network parameters.

208 Conversely, this objective convexity does not holds if we employ multi-layer neural network structures  
 209 for the mixing network  $\mathcal{M}_{\phi}[\boldsymbol{\nu}]$ , leading to unstable training dynamics and convergence to poor local  
 210 minima, especially in offline learning settings where data is limited and overfitting is a concern.

211 **Proposition 5.2.** *If the mixing network  $\mathcal{M}_{\phi}[\boldsymbol{\nu}]$  is a multi-layer feedforward network with  $\boldsymbol{\nu}$  as input*  
 212 *(even with convex activation functions), the objective  $\mathcal{L}(\phi, \boldsymbol{\nu})$  becomes non-convex in  $\boldsymbol{\nu}$ .*

## 213 5.3 Occupancy Ratio Estimation

214 The training objective described in Section 5.2 involves the computation of the total advantage  
 215 function  $A_{\nu}^{\text{tot}}(\mathbf{s}, \mathbf{a})$ , which in turn requires the occupancy ratio term  $\log(\rho_{\text{tot}}^E(\mathbf{s}, \mathbf{a}) / \rho_{\text{tot}}^U(\mathbf{s}, \mathbf{a}))$ . However,

216 this ratio is not directly observable from data. We now describe a practical method to estimate this  
 217 ratio under the CTDE framework. Following extensions from the single-agent setting, the occupancy  
 218 ratio can be estimated by solving the following discriminator-based classification problem:

$$\max_{c \in (0,1)^{|\mathcal{S}| \times |\mathcal{A}|}} J(c) = \mathbb{E}_{\rho_{\text{tot}}^E} [\log c(\mathbf{s}, \mathbf{a})] + \mathbb{E}_{\rho_{\text{tot}}^U} [\log(1 - c(\mathbf{s}, \mathbf{a}))]. \quad (9)$$

219 This objective is concave in  $c$  and admits a unique optimal solution:  $c^*(\mathbf{s}, \mathbf{a}) = \frac{\rho_{\text{tot}}^E(\mathbf{s}, \mathbf{a})}{\rho_{\text{tot}}^E(\mathbf{s}, \mathbf{a}) + \rho_{\text{tot}}^U(\mathbf{s}, \mathbf{a})}$ , from  
 220 which we can recover the occupancy ratio via:  $\frac{\rho_{\text{tot}}^E(\mathbf{s}, \mathbf{a})}{\rho_{\text{tot}}^U(\mathbf{s}, \mathbf{a})} = \frac{c^*(\mathbf{s}, \mathbf{a})}{1 - c^*(\mathbf{s}, \mathbf{a})}$ .

221 In the multi-agent context, directly optimizing  $c(\mathbf{s}, \mathbf{a})$  is impractical due to the exponential joint  
 222 state-action space. We thus leverage the CTDE framework to approximate  $c(\mathbf{s}, \mathbf{a})$  in a decentralized  
 223 manner. We define local discriminators  $\mathbf{c}(\mathbf{s}, \mathbf{a}) = \{c_i(s_i, a_i)\}_{i \in \mathcal{N}}$ , where each  $c_i$  corresponding to  
 224 agent  $i$ . A mixing network  $\mathcal{M}_\eta$ , parameterized by  $\eta$ , is then used to aggregate these local outputs:  
 225  $c(\mathbf{s}, \mathbf{a}) = \mathcal{M}_\eta[\mathbf{c}(\mathbf{s}, \mathbf{a})]$ . The resulting training objective for estimating the occupancy ratio becomes:

$$J(\mathbf{c}, \eta) = \mathbb{E}_{\rho_{\text{tot}}^E} [\log \mathcal{M}_\eta[\mathbf{c}(\mathbf{s}, \mathbf{a})]] + \mathbb{E}_{\rho_{\text{tot}}^U} [\log(1 - \mathcal{M}_\eta[\mathbf{c}(\mathbf{s}, \mathbf{a})])].$$

226 It can be shown that this objective is concave in  $\mathbf{c}$  if the mixing network  $\mathcal{M}_\eta$  is linear in its inputs,  
 227 which contributes to a stable training process. We state this formally below:

228 **Proposition 5.3.** *If the mixing network  $\mathcal{M}_\eta[\mathbf{c}(\mathbf{s}, \mathbf{a})]$  is linear in  $\mathbf{c}(\mathbf{s}, \mathbf{a})$ , then the training objective*  
 229  *$J(\mathbf{c}, \eta)$  for occupancy ratio estimation is concave in both  $\mathbf{c}$  and  $\eta$ .*

## 230 5.4 Policy Extraction

231 We now discuss how to extract the global and local policies from the output of the training objective  
 232 in Section 5.2. Once the value function  $\nu^*$  has been optimized, we can compute the corresponding  
 233 optimal occupancy ratio  $w_{\nu^*}^{\text{tot}}$ , which reflects the ratio between the visitation distributions of the  
 234 optimal policy  $\pi^*$  and the mixture distribution  $\rho_{\text{tot}}^U$ :

$$w_{\nu^*}^{\text{tot}}(\mathbf{s}, \mathbf{a}) = \exp\left(\frac{A_{\nu^*}^{\text{tot}}(\mathbf{s}, \mathbf{a})}{1 + \alpha} - 1\right) = \frac{\rho_{\text{tot}}^{\pi^*}(\mathbf{s}, \mathbf{a})}{\rho_{\text{tot}}^U(\mathbf{s}, \mathbf{a})}.$$

235 The global optimal policy can be then recovered by solving a weighted BC objective:

$$\max_{\pi_{\text{tot}} \in \Pi} \sum_{(\mathbf{s}, \mathbf{a}) \sim \rho_{\text{tot}}^U} w_{\nu^*}^{\text{tot}}(\mathbf{s}, \mathbf{a}) \log \pi_{\text{tot}}(\mathbf{s}, \mathbf{a}), \quad (10)$$

236 where  $\Pi$  denotes the feasible set of joint policies. In the multi-agent setting, especially under the  
 237 CTDE framework, it is more practical and desirable to recover decentralized local policies  $\{\pi_i\}_{i \in \mathcal{N}}$ .  
 238 Therefore, we adopt a local weighted behavior cloning approach to recover each agent's policy:

$$\max_{\pi_i} \sum_{(s_i, a_i) \sim \rho_{\text{tot}}^U} w_{\nu^*}^{\text{tot}}(\mathbf{s}, \mathbf{a}) \log \pi_i(a_i | s_i), \quad (11)$$

239 where all agents share the same global weight  $w_{\nu^*}^{\text{tot}}(\mathbf{s}, \mathbf{a})$ . This enables each local policy to be  
 240 optimized using globally-informed signals, ensuring alignment with the credit assignment in the multi-  
 241 agent system. Furthermore, as shown in Proposition 5.4, the optimization of local policies via this  
 242 decentralized weighted BC is consistent with the global weighted BC formulation in Equation (10).

243 **Proposition 5.4** (Global-Local Consistency). *Assume the global policy space  $\Pi$  is factorizable,*  
 244 *i.e.,  $\Pi = \{\pi_{\text{tot}} \mid \exists \{\pi_i\}_{i \in \mathcal{N}} \text{ such that } \pi_{\text{tot}}(\mathbf{s}, \mathbf{a}) = \prod_{i \in \mathcal{N}} \pi_i(a_i | s_i)\}$ . Let  $\{\pi_i^*\}_{i \in \mathcal{N}}$  and  $\pi_{\text{tot}}^*$  be the*  
 245 *solutions to the local and global weighted BCs, respectively. Then for any  $(\mathbf{s}, \mathbf{a})$ , it holds that:*

$$\pi_{\text{tot}}^*(\mathbf{s}, \mathbf{a}) = \prod_{i \in \mathcal{N}} \pi_i^*(a_i | s_i).$$

246 The local weighted BC objective also reveals an interesting connection between the optimal local  
 247 policies and the local value functions obtained from optimizing the objective in Section 5.2. Recall  
 248 that the total advantage function can be written as:  $A_{\nu^*}^{\text{tot}}(\mathbf{s}, \mathbf{a}) = r(\mathbf{s}, \mathbf{a}) + \gamma \mathbb{E}_{s'} [\nu^{\text{tot}*}(s')] - \nu^{\text{tot}*}(\mathbf{s})$ ,  
 249 where  $\nu^{\text{tot}*}(\mathbf{s}) = \mathcal{M}_{\phi^*}[\nu^*(\mathbf{s})]$  and the term  $r(\mathbf{s}, \mathbf{a}) = \log \frac{\rho_{\text{tot}}^E(\mathbf{s}, \mathbf{a})}{\rho_{\text{tot}}^U(\mathbf{s}, \mathbf{a})}$  can be interpreted as a global reward  
 250 function. We can now define the global  $Q$ -function as follows:  $q^{\text{tot}*}(\mathbf{s}, \mathbf{a}) = r(\mathbf{s}, \mathbf{a}) + \gamma \mathbb{E}_{s'} [\nu^{\text{tot}*}(s')]$ .

251 Next, let's assume that the optimal linear mixing network takes the form:  $\mathcal{M}_{\phi^*}[\nu^*(\mathbf{s})] =$   
 252  $\sum_{i \in \mathcal{N}} \phi_i^* \nu_i^*(s_i) + \phi_0^*$ , where  $\phi^*$  and  $\nu^*$  are the solutions obtained from optimizing the training objec-  
 253 tive in Eq. 6; and the reward function admits a linear decomposition:  $r(\mathbf{s}, \mathbf{a}) = \sum_{i \in \mathcal{N}} \phi_i^* r_i(s_i, a_i) +$

---

**Algorithm 1: MisoDICE – Multi-Agent Imitation Policy Learning**


---

- 1 Initialize local networks  $(\theta_c, \theta_\nu, \theta_\pi)$ , and mixing networks  $(\eta, \phi)$ ;
  - 2 **for** a number of discriminator training steps **do**
  - 3   └ Train  $(\theta_c, \eta)$  from Eq 9 with  $c(\mathbf{s}, \mathbf{a})$  is computed in Eq. 13;
  - 4 Compute occupancy ratio:  $\frac{\rho_{\text{tot}}^E(\mathbf{s}, \mathbf{a})}{\rho_{\text{tot}}^U(\mathbf{s}, \mathbf{a})} = \frac{c(\mathbf{s}, \mathbf{a})}{1-c(\mathbf{s}, \mathbf{a})}$  based on updated  $(\theta_c, \eta)$ ;
  - 5 **for** a number of value function training steps **do**
  - 6   └ Train  $(\theta_\nu, \phi)$  from Eq. 6 using the occupancy ratio estimated above;
  - 7 Compute the weight  $w_{\nu^*}^{\text{tot}}(\mathbf{s}, \mathbf{a})$  using Eq. 8 w.r.t updated  $(\theta_\nu, \phi)$ ;
  - 8 **for** a number of policy training steps **do**
  - 9   └ Update  $\theta_\pi$  based on weighted BC in Eq. 11 and the weight  $w_{\nu^*}^{\text{tot}}(\mathbf{s}, \mathbf{a})$ ;
  - 10 **return** local policies  $\pi_i$  for  $i = 1, \dots, n$
- 

254  $\phi_0^*$ , noting that such decompositions are often feasible or can be approximated in practice. Substituting  
 255 the decomposition into the advantage function yields:  $A_{\nu^*}^{\text{tot}}(\mathbf{s}, \mathbf{a}) = \sum_{i \in \mathcal{N}} \phi_i^*(q_i^*(s_i, a_i) - \nu_i^*(s_i)) +$   
 256  $\gamma \phi_0^*$ , where the local  $Q$ -function is defined as:  $q_i^*(s_i, a_i) = r_i(s_i, a_i) + \gamma \mathbb{E}_{s'_i | s_i, a_i} [\nu_i^*(s'_i)]$ . This  
 257 reformulation allows the occupancy ratio to be written in a decomposed, local form:

$$w_{\nu^*}^{\text{tot}}(\mathbf{s}, \mathbf{a}) = e^{-1} \exp \left( \frac{1}{1 + \alpha} \left( \sum_{i \in \mathcal{N}} \phi_i^*(q_i^*(s_i, a_i) - \nu_i^*(s_i)) + \gamma \phi_0^* \right) \right). \quad (12)$$

258 This expression enables us to derive the following result, which shows how the optimal local policy  
 259 can be explicitly expressed as a function of the local  $Q$ -function and value function:

260 **Proposition 5.5** (Local Policy as a Softmax over Local Functions). *Assume that the joint behavior*  
 261 *policy of the union dataset  $\mu^U(\mathbf{a} | \mathbf{s})$  is decomposable into local behavior policies  $\mu_i^U(a_i | s_i)$ . Let*  
 262  *$\pi_i^*$  be the optimal solution to the local weighted BC objective. Then the optimal local policy can be*  
 263 *expressed as:*

$$\pi_i^*(a_i | s_i) = \frac{1}{\Delta(s_i)} \exp \left( \frac{\phi_i^*}{1 + \alpha} q_i^*(s_i, a_i) + \log \mu_i^U(a_i | s_i) \right),$$

264 where  $\Delta(s_i) = \sum_{a_i \in \mathcal{A}_i} \exp \left( \frac{\phi_i^*}{1 + \alpha} q_i^*(s_i, a_i) + \log \mu_i^U(a_i | s_i) \right)$ , is the normalization constant,  
 265 ensuring that  $\pi_i^*(a_i | s_i)$  is a valid probability distribution over the local action space.

## 266 6 Practical Algorithm

267 In implementation, we construct three types of local networks for every agent  $i \in \mathcal{N}$ : (i) local  
 268 discriminator networks  $\{c_i(s_i, a_i; \theta_c)\}$  (parameterized by  $\theta_c$ ); (ii) local value networks  $\{\nu_i(s_i; \theta_\nu)\}$   
 269 (parameterized by  $\theta_\nu$ ); and (iii) local policy networks  $\{\pi_i(s_i; \theta_\pi)\}$  (parameterized by  $\theta_\pi$ ). In addition,  
 270 there are two different mixing networks:  $\mathcal{M}_\eta$  (with parameters  $\eta$ ) and  $\mathcal{M}_\nu$  (with parameters  $\nu$ ) which  
 271 are used to aggregate local discriminators and value functions, i.e.,

$$c(\mathbf{s}, \mathbf{a}) = \mathcal{M}_\eta[\{c_i(s_i, a_i; \theta_c)\}_{i \in \mathcal{N}}] \quad \nu^{\text{tot}}(\mathbf{s}) = \mathcal{M}_\phi[\{\nu_i(s_i; \theta_\nu)\}_{i \in \mathcal{N}}] \quad (13)$$

272 Note that we use the same local network architectures with shared parameters  $(\theta_c, \theta_\nu, \theta_\pi)$  for all  
 273 agents for efficient training. The overview of our algorithm MisoDICE is illustrated in Algorithm 1.

## 274 7 Experiments

275 We run various experiments on challenging MARL benchmarks, including the StarCraft Multi-Agent  
 276 Challenge version 1 (SMACv1) [46], and its successor, SMACv2 [13]. Both offer discrete action  
 277 spaces and focus on decentralized micromanagement scenarios derived from StarCraft II [13, 46]. In  
 278 these environments, each combat unit is controlled by an individual agent, and the team must learn  
 279 cooperative strategies to defeat built-in AI opponents. SMACv2 introduces increased stochasticity  
 280 and diversity by incorporating features like randomized start positions and unit types. In the appendix,  
 281 we also include experiments on MAMuJoCo [11], another standard MARL benchmark. We note that  
 282 LLMs struggle to provide meaningful preference feedback in MAMuJoCo due to a lack of contextual  
 283 understanding. In this setting, we instead assume access to a rule-based oracle capable of providing  
 284 preference feedback.

Table 1: Final average returns for MisoDICE and baseline methods on SMACv2 tasks.

|            |          | BC                |                   |                   | OMAPL          | INDD           | MARL-SL        | VDN                             | MisoDICE (ours)                  |
|------------|----------|-------------------|-------------------|-------------------|----------------|----------------|----------------|---------------------------------|----------------------------------|
|            |          | ( $\beta = 0.0$ ) | ( $\beta = 0.5$ ) | ( $\beta = 1.0$ ) |                |                |                |                                 |                                  |
| 2c_vs_64zg | 5m_vs_6m | 8.5 $\pm$ 0.1     | 9.7 $\pm$ 0.3     | 12.6 $\pm$ 0.3    | 12.2 $\pm$ 0.4 | 14.6 $\pm$ 1.0 | 14.0 $\pm$ 1.6 | 12.7 $\pm$ 0.6                  | <b>16.4 <math>\pm</math> 1.3</b> |
|            | 6h_vs_8z | 5.0 $\pm$ 1.1     | 6.7 $\pm$ 0.0     | 6.1 $\pm$ 0.1     | 5.7 $\pm$ 0.2  | 6.7 $\pm$ 0.1  | 6.8 $\pm$ 0.1  | 6.2 $\pm$ 1.4                   | <b>7.3 <math>\pm</math> 0.1</b>  |
|            | corridor | 7.0 $\pm$ 0.0     | 7.4 $\pm$ 0.0     | 7.2 $\pm$ 0.1     | 6.6 $\pm$ 0.2  | 7.5 $\pm$ 0.2  | 7.8 $\pm$ 0.1  | 8.2 $\pm$ 0.2                   | <b>8.7 <math>\pm</math> 0.2</b>  |
|            |          | 1.5 $\pm$ 0.1     | 1.5 $\pm$ 0.2     | 4.3 $\pm$ 0.7     | 2.2 $\pm$ 1.3  | 4.4 $\pm$ 1.2  | 1.8 $\pm$ 0.2  | 4.7 $\pm$ 0.6                   | <b>5.8 <math>\pm</math> 0.8</b>  |
| Protoss    | 5_vs_5   | 9.2 $\pm$ 0.1     | 11.7 $\pm$ 0.5    | 10.2 $\pm$ 0.5    | 9.6 $\pm$ 1.1  | 10.9 $\pm$ 0.1 | 11.6 $\pm$ 0.3 | 11.5 $\pm$ 0.2                  | <b>12.4 <math>\pm</math> 0.5</b> |
|            | 10_vs_10 | 10.3 $\pm$ 0.6    | 11.8 $\pm$ 0.5    | 10.6 $\pm$ 0.2    | 10.1 $\pm$ 0.9 | 11.0 $\pm$ 0.7 | 11.9 $\pm$ 0.4 | 12.4 $\pm$ 0.2                  | <b>12.9 <math>\pm</math> 0.2</b> |
|            | 10_vs_11 | 8.2 $\pm$ 0.4     | 9.6 $\pm$ 0.4     | 8.7 $\pm$ 0.3     | 8.5 $\pm$ 1.2  | 9.4 $\pm$ 0.4  | 9.9 $\pm$ 0.3  | 10.4 $\pm$ 0.1                  | <b>10.7 <math>\pm</math> 0.4</b> |
|            | 20_vs_20 | 10.1 $\pm$ 0.2    | 10.4 $\pm$ 0.5    | 10.5 $\pm$ 0.3    | 9.4 $\pm$ 0.4  | 11.4 $\pm$ 0.5 | 13.1 $\pm$ 0.4 | 12.1 $\pm$ 0.5                  | <b>13.5 <math>\pm</math> 0.5</b> |
|            | 20_vs_23 | 8.1 $\pm$ 0.2     | 8.6 $\pm$ 0.3     | 8.3 $\pm$ 0.2     | 7.9 $\pm$ 0.3  | 9.6 $\pm$ 0.3  | 9.6 $\pm$ 0.3  | 10.3 $\pm$ 0.4                  | <b>10.6 <math>\pm</math> 0.2</b> |
| Terran     | 5_vs_5   | 6.5 $\pm$ 0.8     | 8.1 $\pm$ 0.5     | 7.1 $\pm$ 0.6     | 6.2 $\pm$ 0.6  | 7.9 $\pm$ 0.5  | 8.1 $\pm$ 0.4  | 8.3 $\pm$ 1.0                   | <b>9.1 <math>\pm</math> 0.3</b>  |
|            | 10_vs_10 | 6.6 $\pm$ 0.3     | 7.4 $\pm$ 0.4     | 6.7 $\pm$ 0.6     | 6.9 $\pm$ 1.1  | 7.6 $\pm$ 0.4  | 7.7 $\pm$ 0.2  | 8.0 $\pm$ 0.4                   | <b>9.1 <math>\pm</math> 1.3</b>  |
|            | 10_vs_11 | 4.7 $\pm$ 0.2     | 5.7 $\pm$ 0.3     | 5.2 $\pm$ 0.3     | 4.2 $\pm$ 0.6  | 5.7 $\pm$ 0.5  | 5.7 $\pm$ 0.4  | 6.0 $\pm$ 0.2                   | <b>6.4 <math>\pm</math> 0.5</b>  |
|            | 20_vs_20 | 6.9 $\pm$ 0.4     | 7.9 $\pm$ 0.8     | 6.7 $\pm$ 0.2     | 6.9 $\pm$ 0.5  | 8.0 $\pm$ 0.5  | 8.6 $\pm$ 0.3  | 8.2 $\pm$ 0.5                   | <b>9.2 <math>\pm</math> 0.6</b>  |
|            | 20_vs_23 | 4.0 $\pm$ 0.3     | 5.1 $\pm$ 0.4     | 4.3 $\pm$ 0.3     | 4.3 $\pm$ 0.4  | 5.1 $\pm$ 0.4  | 5.1 $\pm$ 0.6  | <b>5.6 <math>\pm</math> 0.3</b> |                                  |
| Zerg       | 5_vs_5   | 5.7 $\pm$ 0.5     | 6.6 $\pm$ 0.4     | 5.9 $\pm$ 0.3     | 6.1 $\pm$ 0.5  | 6.4 $\pm$ 0.2  | 7.1 $\pm$ 0.5  | 7.1 $\pm$ 0.9                   | <b>7.5 <math>\pm</math> 0.1</b>  |
|            | 10_vs_10 | 7.3 $\pm$ 0.1     | 8.7 $\pm$ 0.6     | 7.4 $\pm$ 0.7     | 6.8 $\pm$ 0.6  | 8.2 $\pm$ 0.2  | 9.0 $\pm$ 0.4  | 9.7 $\pm$ 0.5                   | <b>10.2 <math>\pm</math> 0.6</b> |
|            | 10_vs_11 | 7.3 $\pm$ 0.2     | 8.3 $\pm$ 0.4     | 7.3 $\pm$ 0.5     | 7.2 $\pm$ 0.4  | 8.0 $\pm$ 0.2  | 8.8 $\pm$ 0.4  | 9.1 $\pm$ 0.2                   | <b>9.4 <math>\pm</math> 0.3</b>  |
|            | 20_vs_20 | 7.4 $\pm$ 0.6     | 9.0 $\pm$ 0.5     | 7.7 $\pm$ 0.2     | 6.9 $\pm$ 0.5  | 8.3 $\pm$ 0.4  | 8.8 $\pm$ 0.6  | 9.0 $\pm$ 0.5                   | <b>10.2 <math>\pm</math> 0.6</b> |
|            | 20_vs_23 | 7.1 $\pm$ 0.3     | 7.9 $\pm$ 0.3     | 7.0 $\pm$ 0.2     | 7.1 $\pm$ 0.4  | 8.2 $\pm$ 0.4  | 8.8 $\pm$ 0.2  | 8.7 $\pm$ 0.5                   | <b>9.5 <math>\pm</math> 0.2</b>  |

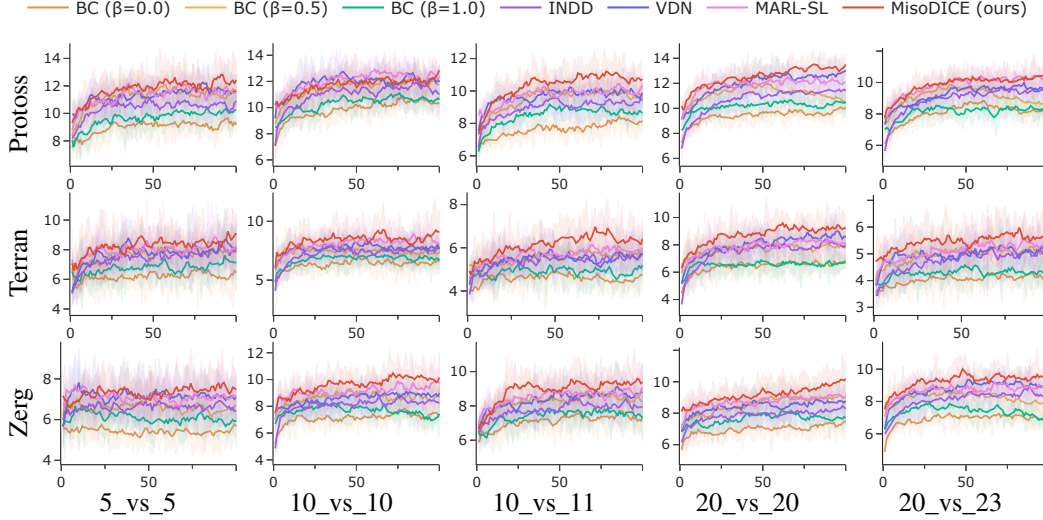

Figure 1: Learning curves of the average return for MisoDICE and baseline methods on SMACv2.

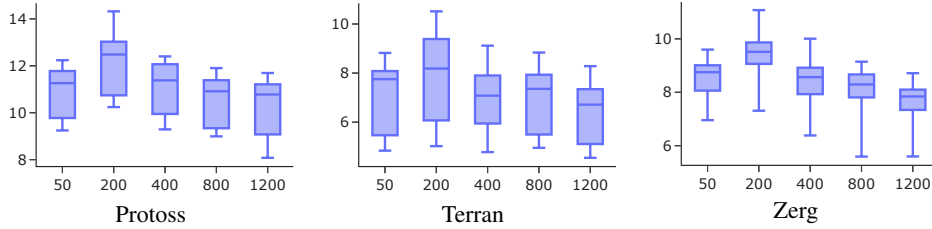

Figure 2: Box plots of final returns on SMACv2 by varying the number of top-k expert trajectories.

285 **Dataset** We use the offline data generated from [7, 56], providing trajectories categorized by quality  
286 (expert, medium, and poor) across various tasks in SMACv1 and SMACv2. For our experiments  
287 focused on learning from unlabeled, mixed-quality demonstrations, we curated a suboptimal dataset  
288 for each task by sampling 200 expert and 1000 poor trajectories from the datasets in [7, 56]. These  
289 were combined and shuffled to form an unlabeled dataset,  $\mathcal{D}^U$ . This construction reflects realistic  
290 scenarios where demonstration quality is heterogeneous and unknown a priori. The expert dataset  
291  $\mathcal{D}^E$ , used in Phase 2 of MisoDICE, is derived from  $\mathcal{D}^U$  based on our labeling procedure in Section 4.



**Baselines** We compare MisoDICE performance against several key baselines. Multi-Agent BC (MA-BC) serves as a foundational baseline, adapted for mixed data via a coefficient  $\beta$  that balances learning between the expert dataset ( $\mathcal{D}^E$ ) and the union dataset ( $\mathcal{D}^U$ ). We evaluate MA-BC under different  $\beta$  values:  $\beta = 1.0$  (expert-only),  $\beta = 0.5$  (equal weighting), and  $\beta = 0.0$  (union-only). The end-to-end preference-based OMAPL trains a policy directly from preference data generated by LLMs. Individual DemoDICE (INDD) applies the single-agent DemoDICE algorithm independently to each agent, using individual marginal distributions from  $\mathcal{D}^E$  and  $\mathcal{D}^U$ . MARL with Supervised Reward (MARL-SL) follows a two-stage setup: a reward is learned from preference data via supervised learning, followed by MARL-based policy optimization. Finally, MisoDICE-VDN is an ablation using a standard Value Decomposition Network mixer (sum of local values) in place of MisoDICE’s learnable mixing, isolating the contribution of the advanced value mixing architecture.

**Results** Table 1 provides a detailed quantitative comparison of the final average returns achieved by MisoDICE and the baselines across various SMACv2 maps. MisoDICE consistently achieves the highest mean return in nearly every scenario tested, significantly outperforming all baseline methods. The INDD baseline consistently underperforms compared to MisoDICE, highlighting the deficiency of independent learning and the necessity of coordinated value decomposition in multi-agent settings. While MARL-SL and MisoDICE-VDN represent stronger baselines by incorporating MARL optimization and value decomposition, their performance is still generally lower than MisoDICE. This suggests that MisoDICE’s formulation for handling mixed-quality data, combined with its specific mixing architecture, provides a distinct advantage over learning a reward via supervised methods first or using a simpler additive decomposition like VDN. Furthermore, OMAPL’s performance, derived directly from Phase 1 preferences, while sometimes competitive, does not match MisoDICE’s final results, emphasizing the benefit of the subsequent IL phase (Phase 2) employed by MisoDICE.

Figure 1 plots the average return curve during training for MisoDICE and the baselines on the same set of SMACv2 tasks. These plots further reinforce the findings from Table 1. The learning curve for MisoDICE (shown in red) consistently rises above those of the other methods, demonstrating not only higher final performance but often faster and more stable learning across different game tasks.

**Ablation Studies** Figure 2 presents box plots of the final returns achieved on SMACv2 maps when varying the number of top trajectories ( $k$ ) selected as the expert dataset ( $\mathcal{D}^E$ ). The x-axis is the value of  $k$ , ranging from 50 to 1200, while the y-axis shows the distribution of returns achieved across multiple runs. For all three races depicted (Protoss, Terran, and Zerg), the plots generally show that performance tends to peak when a moderate number of top trajectories are selected as experts (around  $k = 200$ ). Using too few ( $k = 50$ ) or too many ( $k = 800, 1200$ ) expert trajectories seems to result in lower median returns and potentially higher variance, although performance remains relatively robust across different  $k$  values. This suggests that our data-labeling procedure successfully isolates high-quality trajectories, but the optimal amount of expert data required for the IL phase is neither the absolute minimum nor the maximum available, highlighting a trade-off in selecting the size of  $\mathcal{D}^E$ . In addition, we conduct several ablation studies which include investigating the effect of the hyperparameter  $\alpha$  controlling the influence of suboptimal data, and the performance difference when using LLMs of varying capabilities (GPT-4o vs. GPT-4o-mini) and when employing a simple rule-based method for initial preference generation. For details, we refer to our appendix.

## 8 Conclusion

We address offline multi-agent IL with unlabeled, mixed-quality demonstrations. Our proposed two-stage framework, comprising a trajectory labeling pipeline and the MisoDICE algorithm, enables robust learning from such restricted data. By leveraging LLMs and preference-based learning for effective labeling, and introducing a scalable, value-decomposed extension of DICE for multi-agent settings, our approach achieved both computational efficiency and global-local policy consistency. Empirical results on multi-agent benchmarks show that MisoDICE outperforms all baselines.

**Limitations and Future Work.** Our work is limited to cooperative settings. Extending this approach to competitive environments remains an open challenge for future investigation. Additionally, the reliance on LLMs for trajectory labeling has limitations in domains like MaMuJoCo, where abstract task semantics are difficult for LLMs to interpret accurately. Addressing these challenges opens up exciting directions for future research in scalable, generalizable imitation learning.

## References

- [1] G. An, J. Lee, X. Zuo, N. Kosaka, K.-M. Kim, and H. O. Song. Direct preference-based policy optimization without reward modeling. *Advances in Neural Information Processing Systems*, 36:70247–70266, 2023.
- [2] N. Baram, O. Anschel, and S. Mannor. Model-based adversarial imitation learning. *arXiv preprint arXiv:1612.02179*, 2016.
- [3] S. Barrett, A. Rosenfeld, S. Kraus, and P. Stone. Making friends on the fly: Cooperating with new teammates. *Artificial Intelligence*, 242:132–171, 2017.
- [4] M. Beliaev and R. Pedarsani. Inverse reinforcement learning by estimating expertise of demonstrators. In *Proceedings of the AAAI Conference on Artificial Intelligence*, volume 39, pages 15532–15540, 2025.
- [5] K. Bogert and P. Doshi. Multi-robot inverse reinforcement learning under occlusion with interactions. In *Proceedings of the 2014 international conference on Autonomous agents and multi-agent systems*, pages 173–180, 2014.
- [6] T. V. Bui, T. Mai, and H. T. Nguyen. O-mapl: Offline multi-agent preference learning. *arXiv preprint arXiv:2501.18944*, 2025.
- [7] T. V. Bui, T. H. Nguyen, and T. Mai. Comadice: Offline cooperative multi-agent reinforcement learning with stationary distribution shift regularization. *arXiv preprint arXiv:2410.01954*, 2024.
- [8] X. Cao, F.-M. Luo, J. Ye, T. Xu, Z. Zhang, and Y. Yu. Limited preference aided imitation learning from imperfect demonstrations. In *Forty-first International Conference on Machine Learning*, 2024.
- [9] H. Choi, S. Jung, H. Ahn, and T. Moon. Listwise reward estimation for offline preference-based reinforcement learning. *arXiv preprint arXiv:2408.04190*, 2024.
- [10] P. F. Christiano, J. Leike, T. Brown, M. Martic, S. Legg, and D. Amodei. Deep reinforcement learning from human preferences. *Advances in neural information processing systems*, 30, 2017.
- [11] C. S. de Witt, B. Peng, P.-A. Kamienny, P. Torr, W. Böhmer, and S. Whiteson. Deep multi-agent reinforcement learning for decentralized continuous cooperative control. *arXiv preprint arXiv:2003.06709*, 19, 2020.
- [12] B. Ellis, J. Cook, S. Moalla, M. Samvelyan, M. Sun, A. Mahajan, J. Foerster, and S. Whiteson. Smacv2: An improved benchmark for cooperative multi-agent reinforcement learning. *Advances in Neural Information Processing Systems*, 36:37567–37593, 2023.
- [13] B. Ellis, S. Moalla, M. Samvelyan, M. Sun, A. Mahajan, J. N. Foerster, and S. Whiteson. Smacv2: An improved benchmark for cooperative multi-agent reinforcement learning. *arXiv preprint arXiv:2212.07489*, 2022.
- [14] C. Finn, P. Christiano, P. Abbeel, and S. Levine. A connection between generative adversarial networks, inverse reinforcement learning, and energy-based models. *arXiv preprint arXiv:1611.03852*, 2016.
- [15] J. Foerster, G. Farquhar, T. Afouras, N. Nardelli, and S. Whiteson. Counterfactual multi-agent policy gradients. In *Proceedings of the AAAI conference on artificial intelligence*, volume 32, 2018.
- [16] J. Fu, K. Luo, and S. Levine. Learning robust rewards with adversarial inverse reinforcement learning. *arXiv preprint arXiv:1710.11248*, 2017.
- [17] C.-X. Gao, S. Fang, C. Xiao, Y. Yu, and Z. Zhang. Hindsight preference learning for offline preference-based reinforcement learning. *arXiv preprint arXiv:2407.04451*, 2024.

- [18] D. Garg, S. Chakraborty, C. Cundy, J. Song, and S. Ermon. Iq-learn: Inverse soft-q learning for imitation. *Advances in Neural Information Processing Systems*, 34:4028–4039, 2021.
- [19] D. Ha, A. M. Dai, and Q. V. Le. Hypernetworks. In *International Conference on Learning Representations*, 2017.
- [20] J. Hejna, R. Rafailov, H. Sikchi, C. Finn, S. Niekum, W. B. Knox, and D. Sadigh. Contrastive preference learning: Learning from human feedback without rl. *arXiv preprint arXiv:2310.13639*, 2023.
- [21] J. Hejna and D. Sadigh. Inverse preference learning: Preference-based rl without a reward function. *Advances in Neural Information Processing Systems*, 36, 2024.
- [22] D. J. Hejna III and D. Sadigh. Few-shot preference learning for human-in-the-loop rl. In *Conference on Robot Learning*, pages 2014–2025. PMLR, 2023.
- [23] J. Ho and S. Ermon. Generative adversarial imitation learning. *Advances in neural information processing systems*, 29, 2016.
- [24] B. Ibarz, J. Leike, T. Pohlen, G. Irving, S. Legg, and D. Amodei. Reward learning from human preferences and demonstrations in atari. *Advances in neural information processing systems*, 31, 2018.
- [25] S. Kang, Y. Lee, and S.-Y. Yun. Dpm: Dual preferences-based multi-agent reinforcement learning. In *ICML 2024 Workshop on Models of Human Feedback for AI Alignment*, 2024.
- [26] Y. Kang, D. Shi, J. Liu, L. He, and D. Wang. Beyond reward: Offline preference-guided policy optimization. *arXiv preprint arXiv:2305.16217*, 2023.
- [27] C. Kim, J. Park, J. Shin, H. Lee, P. Abbeel, and K. Lee. Preference transformer: Modeling human preferences using transformers for rl. *arXiv preprint arXiv:2303.00957*, 2023.
- [28] G.-H. Kim, S. Seo, J. Lee, W. Jeon, H. Hwang, H. Yang, and K.-E. Kim. Demodice: Offline imitation learning with supplementary imperfect demonstrations. In *International Conference on Learning Representations*, 2021.
- [29] I. Kostrikov, O. Nachum, and J. Tompson. Imitation learning via off-policy distribution matching. In *International Conference on Learning Representations*, 2019.
- [30] C.-M. Lai, H.-C. Wang, P.-C. Hsieh, F. Wang, M.-H. Chen, and S.-H. Sun. Diffusion-reward adversarial imitation learning. *Advances in Neural Information Processing Systems*, 37:95456–95487, 2024.
- [31] H. M. Le, Y. Yue, P. Carr, and P. Lucey. Coordinated multi-agent imitation learning. In *International Conference on Machine Learning*, pages 1995–2003. PMLR, 2017.
- [32] K. Lee, L. Smith, and P. Abbeel. Pebble: Feedback-efficient interactive reinforcement learning via relabeling experience and unsupervised pre-training. *arXiv preprint arXiv:2106.05091*, 2021.
- [33] X. Lin, P. A. Beling, and R. Cogill. Multi-agent inverse reinforcement learning for zero-sum games. *arXiv preprint arXiv:1403.6508*, 2014.
- [34] R. Lowe, Y. I. Wu, A. Tamar, J. Harb, O. Pieter Abbeel, and I. Mordatch. Multi-agent actor-critic for mixed cooperative-competitive environments. *Advances in neural information processing systems*, 30, 2017.
- [35] T. Mai, T. Nguyen, et al. Mimicking to dominate: Imitation learning strategies for success in multiagent games. *Advances in Neural Information Processing Systems*, 37:84669–84697, 2024.
- [36] T. A. Mai, T. H. Nguyen, et al. Inverse factorized soft q-learning for cooperative multi-agent imitation learning. In *The Thirty-eighth Annual Conference on Neural Information Processing Systems*, 2024.

- [37] S. Mukherjee, A. Lalitha, K. Kalantari, A. Deshmukh, G. Liu, Y. Ma, and B. Kveton. Optimal design for human preference elicitation. 2024.
- [38] T. H. Nguyen, T. A. Mai, et al. Comadice: Offline cooperative multi-agent reinforcement learning with stationary distribution shift regularization. In *The Thirteenth International Conference on Learning Representations*, 2024.
- [39] OpenAI. Gpt-4o. 2024. <https://openai.com/index/hello-gpt-4o/>.
- [40] L. Pan, L. Huang, T. Ma, and H. Xu. Plan better amid conservatism: Offline multi-agent reinforcement learning with actor rectification. In *International conference on machine learning*, pages 17221–17237. PMLR, 2022.
- [41] D. A. Pomerleau. Efficient training of artificial neural networks for autonomous navigation. *Neural computation*, 3(1):88–97, 1991.
- [42] T. Rashid, M. Samvelyan, C. S. De Witt, G. Farquhar, J. Foerster, and S. Whiteson. Monotonic value function factorisation for deep multi-agent reinforcement learning. *The Journal of Machine Learning Research*, 21(1):7234–7284, 2020.
- [43] S. Reddy, A. D. Dragan, and S. Levine. Sqil: Imitation learning via reinforcement learning with sparse rewards. *arXiv preprint arXiv:1905.11108*, 2019.
- [44] T. S. Reddy, V. Gopikrishna, G. Zaruba, and M. Huber. Inverse reinforcement learning for decentralized non-cooperative multiagent systems. In *2012 IEEE International Conference on Systems, Man, and Cybernetics (SMC)*, pages 1930–1935. IEEE, 2012.
- [45] S. Ross and D. Bagnell. Efficient reductions for imitation learning. In *Proceedings of the thirteenth international conference on artificial intelligence and statistics*, pages 661–668. JMLR Workshop and Conference Proceedings, 2010.
- [46] M. Samvelyan, T. Rashid, C. S. De Witt, G. Farquhar, N. Nardelli, T. G. Rudner, C.-M. Hung, P. H. Torr, J. Foerster, and S. Whiteson. The starcraft multi-agent challenge. *arXiv preprint arXiv:1902.04043*, 2019.
- [47] A. Schlaginhausen and M. Kamgarpour. Identifiability and generalizability in constrained inverse reinforcement learning. In *International Conference on Machine Learning*, pages 30224–30251. PMLR, 2023.
- [48] J. Schulman, F. Wolski, P. Dhariwal, A. Radford, and O. Klimov. Proximal policy optimization algorithms. *arXiv preprint arXiv:1707.06347*, 2017.
- [49] J. Shao, Y. Qu, C. Chen, H. Zhang, and X. Ji. Counterfactual conservative q learning for offline multi-agent reinforcement learning. *Advances in Neural Information Processing Systems*, 36, 2024.
- [50] K. Son, D. Kim, W. J. Kang, D. E. Hostallero, and Y. Yi. Qtran: Learning to factorize with transformation for cooperative multi-agent reinforcement learning. In *International conference on machine learning*, pages 5887–5896. PMLR, 2019.
- [51] J. Song, H. Ren, D. Sadigh, and S. Ermon. Multi-agent generative adversarial imitation learning. *Advances in neural information processing systems*, 31, 2018.
- [52] A. Šošić, W. R. KhudaBukhsh, A. M. Zoubir, and H. Koepl. Inverse reinforcement learning in swarm systems. *arXiv preprint arXiv:1602.05450*, 2016.
- [53] P. Sunehag, G. Lever, A. Gruslys, W. M. Czarnecki, V. Zambaldi, M. Jaderberg, M. Lanctot, N. Sonnerat, J. Z. Leibo, K. Tuyls, et al. Value-decomposition networks for cooperative multi-agent learning. *arXiv preprint arXiv:1706.05296*, 2017.
- [54] B. Wang, G. Wu, T. Pang, Y. Zhang, and Y. Yin. Diffail: Diffusion adversarial imitation learning. In *Proceedings of the AAAI Conference on Artificial Intelligence*, volume 38, pages 15447–15455, 2024.

- 483 [55] J. Wang, Z. Ren, T. Liu, Y. Yu, and C. Zhang. Qplex: Duplex dueling multi-agent q-learning.  
484 *arXiv preprint arXiv:2008.01062*, 2020.
- 485 [56] X. Wang, H. Xu, Y. Zheng, and X. Zhan. Offline multi-agent reinforcement learning with  
486 implicit global-to-local value regularization. *Advances in Neural Information Processing*  
487 *Systems*, 36, 2022.
- 488 [57] Y. Yang, X. Ma, C. Li, Z. Zheng, Q. Zhang, G. Huang, J. Yang, and Q. Zhao. Believe what you  
489 see: Implicit constraint approach for offline multi-agent reinforcement learning. *Advances in*  
490 *Neural Information Processing Systems*, 34:10299–10312, 2021.
- 491 [58] C. Yu, A. Velu, E. Vinitzky, J. Gao, Y. Wang, A. Bayen, and Y. Wu. The surprising effectiveness  
492 of ppo in cooperative multi-agent games. *Advances in Neural Information Processing Systems*,  
493 35:24611–24624, 2022.
- 494 [59] L. Yu, J. Song, and S. Ermon. Multi-agent adversarial inverse reinforcement learning. In  
495 *International Conference on Machine Learning*, pages 7194–7201. PMLR, 2019.
- 496 [60] M. Zare, P. M. Kebria, A. Khosravi, and S. Nahavandi. A survey of imitation learning:  
497 Algorithms, recent developments, and challenges. *IEEE Transactions on Cybernetics*, 2024.
- 498 [61] S. Zeng, C. Li, A. Garcia, and M. Hong. When demonstrations meet generative world models:  
499 A maximum likelihood framework for offline inverse reinforcement learning. *Advances in*  
500 *Neural Information Processing Systems*, 36:65531–65565, 2023.
- 501 [62] N. Zhang, X. Wang, Q. Cui, R. Zhou, S. M. Kakade, and S. S. Du. Multi-agent reinforcement  
502 learning from human feedback: Data coverage and algorithmic techniques. *arXiv preprint*  
503 *arXiv:2409.00717*, 2024.
- 504 [63] W. Zhang, H. Xu, H. Niu, P. Cheng, M. Li, H. Zhang, G. Zhou, and X. Zhan. Discriminator-  
505 guided model-based offline imitation learning. In *Conference on robot learning*, pages 1266–  
506 1276. PMLR, 2023.
- 507 [64] Z. Zhang, Y. Sun, J. Ye, T.-S. Liu, J. Zhang, and Y. Yu. Flow to better: Offline preference-  
508 based reinforcement learning via preferred trajectory generation. In *The Twelfth International*  
509 *Conference on Learning Representations*, 2023.
- 510 [65] H. Zhao, X. Yu, D. M. Bossens, I. Tsang, and Q. Gu. Beyond-expert performance with  
511 limited demonstrations: Efficient imitation learning with double exploration. In *The Thirteenth*  
512 *International Conference on Learning Representations*, 2025.

# APPENDIX

513

## 514 **Contents**

|     |                                                                                        |           |
|-----|----------------------------------------------------------------------------------------|-----------|
| 515 | <b>A Missing Proofs</b>                                                                | <b>15</b> |
| 516 | A.1 Proof of Proposition 5.1 . . . . .                                                 | 15        |
| 517 | A.2 Proof of Proposition 5.2 . . . . .                                                 | 15        |
| 518 | A.3 Proof of Proposition 5.3 . . . . .                                                 | 16        |
| 519 | A.4 Proof of Proposition 5.4 . . . . .                                                 | 16        |
| 520 | A.5 Proof of Proposition 5.5 . . . . .                                                 | 17        |
| 521 | <b>B Additional Details</b>                                                            | <b>18</b> |
| 522 | B.1 Unlabeled Imperfect Dataset . . . . .                                              | 18        |
| 523 | B.2 Rule-based vs. LLM-based Trajectory Ranking Techniques . . . . .                   | 18        |
| 524 | B.3 Baselines . . . . .                                                                | 20        |
| 525 | B.4 Hyperparameters . . . . .                                                          | 22        |
| 526 | B.5 Algorithm . . . . .                                                                | 23        |
| 527 | B.6 Experiment Setup . . . . .                                                         | 23        |
| 528 | <b>C Evaluation</b>                                                                    | <b>24</b> |
| 529 | C.1 Additional Experimental Results . . . . .                                          | 24        |
| 530 | C.2 Ablation Study 1: Impact of the Number of Identified Expert Trajectories (Top-k) . | 24        |
| 531 | C.3 Ablation Study 2: Impact of the Suboptimal Data Influence Hyperparameter . . . .   | 27        |
| 532 | C.4 Ablation Study 3: Comparison of LLM Capabilities for Preference Labeling . . . .   | 28        |
| 533 | C.5 Ablation Study 4: Performance with Rule-Based Preference Labeling . . . . .        | 30        |
| 534 | C.6 Ablation Study 5: Performance with Ground Truth Data Labels . . . . .              | 31        |

## A Missing Proofs

### A.1 Proof of Proposition 5.1

*Proposition.* If the mixing network  $\mathcal{M}_\phi[\boldsymbol{\nu}(\mathbf{s})]$  is a linear function of both  $\boldsymbol{\nu}(\mathbf{s})$  and  $\phi$ , then the training objective  $\mathcal{L}(\phi, \boldsymbol{\nu})$  is convex in both  $\phi$  and  $\boldsymbol{\nu}$ .

*Proof.* We write the training objective as:

$$\mathcal{L}(\phi, \boldsymbol{\nu}) = (1 - \gamma) \mathbb{E}_{\mathbf{s} \sim P_0} [\mathcal{M}_\phi[\boldsymbol{\nu}(\mathbf{s})]] + \mathbb{E}_{(\mathbf{s}, \mathbf{a}) \sim \rho_{\text{tot}}^U} [w_{\boldsymbol{\nu}}^*(\mathbf{s}, \mathbf{a}) (A_{\boldsymbol{\nu}}^{\text{tot}}(\mathbf{s}, \mathbf{a}) - (1 + \alpha) \log w_{\boldsymbol{\nu}}^*(\mathbf{s}, \mathbf{a}))],$$

where the total advantage function  $A_{\boldsymbol{\nu}}^{\text{tot}}$  and the optimal weighting function  $w_{\boldsymbol{\nu}}^*$  are defined as:

$$A_{\boldsymbol{\nu}}^{\text{tot}}(\mathbf{s}, \mathbf{a}) = \log \frac{\rho_{\text{tot}}^E(\mathbf{s}, \mathbf{a})}{\rho_{\text{tot}}^U(\mathbf{s}, \mathbf{a})} + \gamma \sum_{\mathbf{s}'} \mathcal{T}(\mathbf{s}' | \mathbf{s}, \mathbf{a}) \mathcal{M}_\phi[\boldsymbol{\nu}(\mathbf{s}')] - \mathcal{M}_\phi[\boldsymbol{\nu}(\mathbf{s})], \quad (14)$$

$$w_{\boldsymbol{\nu}}^*(\mathbf{s}, \mathbf{a}) = \exp \left( \frac{A_{\boldsymbol{\nu}}^{\text{tot}}(\mathbf{s}, \mathbf{a})}{1 + \alpha} - 1 \right). \quad (15)$$

We can simplify the objective as:

$$\mathcal{L}(\phi, \boldsymbol{\nu}) = (1 - \gamma) \mathbb{E}_{\mathbf{s} \sim P_0} [\mathcal{M}_\phi[\boldsymbol{\nu}(\mathbf{s})]] + (1 + \alpha) \mathbb{E}_{(\mathbf{s}, \mathbf{a}) \sim \rho_{\text{tot}}^U} \left[ \exp \left( \frac{A_{\boldsymbol{\nu}}^{\text{tot}}(\mathbf{s}, \mathbf{a})}{1 + \alpha} - 1 \right) \right].$$

We now observe that if  $\mathcal{M}_\phi[\boldsymbol{\nu}(\mathbf{s})]$  is linear in both  $\boldsymbol{\nu}(\mathbf{s})$  and  $\phi$ , then each term in  $A_{\boldsymbol{\nu}}^{\text{tot}}(\mathbf{s}, \mathbf{a})$  is also linear in  $\boldsymbol{\nu}(\mathbf{s})$  and  $\phi$ , since:

- The log-ratio term  $\log \frac{\rho_{\text{tot}}^E}{\rho_{\text{tot}}^U}$  is constant with respect to both  $\phi$  and  $\boldsymbol{\nu}$ ,
- The remaining terms are composed of expectations of linear functions (due to the linearity of  $\mathcal{M}_\phi[\cdot]$ ) and thus remain linear.

As a result,  $A_{\boldsymbol{\nu}}^{\text{tot}}(\mathbf{s}, \mathbf{a})$  is linear, and the exponential of a linear function is convex. Since the outer expectation is a linear operator, and the sum of convex and linear functions remains convex, the entire objective  $\mathcal{L}(\phi, \boldsymbol{\nu})$  is convex in both  $\phi$  and  $\boldsymbol{\nu}(\mathbf{s})$ . This concludes the convexity analysis.

□

### A.2 Proof of Proposition 5.2

*Proposition.* If the mixing network  $\mathcal{M}_\phi[\boldsymbol{\nu}]$  is a multi-layer feedforward network with  $\boldsymbol{\nu}$  as input (even with convex activation functions), the objective  $\mathcal{L}(\phi, \boldsymbol{\nu})$  becomes non-convex in  $\boldsymbol{\nu}$ .

*Proof.* Now assume that  $\mathcal{M}_\phi[\boldsymbol{\nu}(\mathbf{s})]$  is constructed using a multi-layer feedforward neural network with convex activation functions (e.g., ReLU, softplus). This implies that  $\mathcal{M}_\phi[\boldsymbol{\nu}(\mathbf{s})]$  is a convex function of both  $\phi$  and  $\boldsymbol{\nu}(\mathbf{s})$ , but it is not linear. We aim to show that, under this assumption, the objective  $\mathcal{L}(\phi, \boldsymbol{\nu})$  is no longer convex in the joint parameters  $(\phi, \boldsymbol{\nu})$ .

Recall that the simplified objective can be written as:

$$\mathcal{L}(\phi, \boldsymbol{\nu}) = (1 - \gamma) \mathbb{E}_{\mathbf{s} \sim P_0} [\mathcal{M}_\phi[\boldsymbol{\nu}(\mathbf{s})]] + (1 + \alpha) \mathbb{E}_{(\mathbf{s}, \mathbf{a}) \sim \rho_{\text{tot}}^U} \left[ \exp \left( \frac{A_{\boldsymbol{\nu}}^{\text{tot}}(\mathbf{s}, \mathbf{a})}{1 + \alpha} - 1 \right) \right],$$

where  $A_{\boldsymbol{\nu}}^{\text{tot}}(\mathbf{s}, \mathbf{a})$  is defined as:

$$A_{\boldsymbol{\nu}}^{\text{tot}}(\mathbf{s}, \mathbf{a}) = \log \frac{\rho_{\text{tot}}^E(\mathbf{s}, \mathbf{a})}{\rho_{\text{tot}}^U(\mathbf{s}, \mathbf{a})} + \gamma \sum_{\mathbf{s}'} \mathcal{T}(\mathbf{s}' | \mathbf{s}, \mathbf{a}) \mathcal{M}_\phi[\boldsymbol{\nu}(\mathbf{s}')] - \mathcal{M}_\phi[\boldsymbol{\nu}(\mathbf{s})].$$

The log-ratio term is constant with respect to  $(\phi, \boldsymbol{\nu})$ , so the dependence of  $\mathcal{L}$  on these variables arises entirely through  $\mathcal{M}_\phi[\boldsymbol{\nu}(\cdot)]$ . Now observe:

- By assumption, the mapping  $(\phi, \boldsymbol{\nu}) \mapsto \mathcal{M}_\phi[\boldsymbol{\nu}(\mathbf{s})]$  is convex.

- Consequently, the term  $\gamma \sum_{\mathbf{s}'} \mathcal{T}(\mathbf{s}' \mid \mathbf{s}, \mathbf{a}) \mathcal{M}_\phi[\boldsymbol{\nu}(\mathbf{s}')] is convex in  $(\phi, \boldsymbol{\nu})$ , as it is a non-negative linear combination of convex functions.$
- However, the term  $-\mathcal{M}_\phi[\boldsymbol{\nu}(\mathbf{s})]$  is concave in  $(\phi, \boldsymbol{\nu})$ , and hence  $A_\boldsymbol{\nu}^{\text{tot}}(\mathbf{s}, \mathbf{a})$  is generally the difference of convex functions, which is not necessarily convex.
- Since the exponential function is convex and monotonically increasing, applying it to a non-convex function (like  $A_\boldsymbol{\nu}^{\text{tot}}/(1 + \alpha) - 1$ ) does not preserve convexity in general.

Hence, we conclude that the objective  $\mathcal{L}(\phi, \boldsymbol{\nu})$  is not convex in general when  $\mathcal{M}_\phi[\boldsymbol{\nu}(\mathbf{s})]$  is convex but not linear.

□

### A.3 Proof of Proposition 5.3

*Proposition.* If the mixing network  $\mathcal{M}_\eta[\mathbf{c}(\mathbf{s}, \mathbf{a})]$  is linear in  $\mathbf{c}(\mathbf{s}, \mathbf{a})$ , then the training objective  $J(\mathbf{c}, \eta)$  for occupancy ratio estimation is concave in both  $\mathbf{c}$  and  $\eta$ .

*Proof.* We write the objective as:

$$J(\mathbf{c}, \eta) = \mathbb{E}_{\rho_{\text{tot}}^E} [\log \mathcal{M}_\eta[\mathbf{c}(\mathbf{s}, \mathbf{a})]] + \mathbb{E}_{\rho_{\text{tot}}^U} [\log (1 - \mathcal{M}_\eta[\mathbf{c}(\mathbf{s}, \mathbf{a})])],$$

where  $\mathcal{M}_\eta[\cdot]$  is linear in  $\eta$  and  $\mathbf{c}(\mathbf{s}, \mathbf{a})$ . Now observe:

- The composition  $\log \mathcal{M}_\eta[\mathbf{c}(\mathbf{s}, \mathbf{a})]$  is a concave function in  $\mathcal{M}_\eta[\mathbf{c}(\mathbf{s}, \mathbf{a})]$ , and hence concave in both  $\eta$  and  $\mathbf{c}$ .
- Similarly,  $\log(1 - \mathcal{M}_\eta[\mathbf{c}(\mathbf{s}, \mathbf{a})])$  is also concave in  $1 - \mathcal{M}_\eta[\mathbf{c}(\mathbf{s}, \mathbf{a})]$ , and thus in  $\eta$  and  $\mathbf{c}$ .
- Since expectations preserve concavity, both terms in  $J(\mathbf{c}, \eta)$  are concave in  $(\mathbf{c}, \eta)$ .

Here we note that if  $\mathcal{M}_\eta[\mathbf{c}(\mathbf{s}, \mathbf{a})]$  is a convex (but non-linear) function of  $\eta$  and/or  $\mathbf{c}$ , such as when using a neural network with convex activations (e.g., ReLU, softplus). In this case:

- The function  $\log \mathcal{M}_\eta[\mathbf{c}(\mathbf{s}, \mathbf{a})]$  is the composition of a concave function ( $\log$ ) with a convex function. This composition is in general *not concave*.
- Likewise,  $\log(1 - \mathcal{M}_\eta[\mathbf{c}(\mathbf{s}, \mathbf{a})])$  is the composition of a concave function with a concave function, which again does not preserve concavity.

Therefore,  $J(\mathbf{c}, \eta)$  is no longer guaranteed to be concave in  $(\mathbf{c}, \eta)$  when  $\mathcal{M}_\eta[\cdot]$  is convex but not linear. □

### A.4 Proof of Proposition 5.4

*Proposition.* Assume the global policy space  $\Pi$  is factorizable, i.e.,  $\Pi = \{\boldsymbol{\pi}_{\text{tot}} \mid \exists \{\pi_i\}_{i \in \mathcal{N}} \text{ such that } \boldsymbol{\pi}_{\text{tot}}(\mathbf{s}, \mathbf{a}) = \prod_{i \in \mathcal{N}} \pi_i(a_i \mid s_i)\}$ . Let  $\{\pi_i^*\}_{i \in \mathcal{N}}$  and  $\boldsymbol{\pi}_{\text{tot}}^*$  be the solutions to the local and global weighted BCs, respectively. Then for any  $(\mathbf{s}, \mathbf{a})$ , it holds that:

$$\boldsymbol{\pi}_{\text{tot}}^*(\mathbf{s}, \mathbf{a}) = \prod_{i \in \mathcal{N}} \pi_i^*(a_i \mid s_i).$$

*Proof.* For notational simplicity, let  $\Phi(\boldsymbol{\pi}_{\text{tot}})$  be the objective function of the global WBC problem:

$$\Phi(\boldsymbol{\pi}_{\text{tot}}) = \mathbb{E}_{\mathbf{s}, \mathbf{a} \sim \rho_{\text{tot}}^U} [w_{\boldsymbol{\nu}^*}^{\text{tot}}(\mathbf{s}, \mathbf{a}) \log \boldsymbol{\pi}_{\text{tot}}(\mathbf{a} \mid \mathbf{s})].$$



594 Since we are seeking a decomposable policy  $\pi_{\text{tot}}(\mathbf{a}|\mathbf{s}) = \prod_{i \in \mathcal{N}} \pi_i(a_i|s_i)$ , we have, for any  $\pi_{\text{tot}} \in \Pi$   
 595 such that  $\pi_{\text{tot}} = \prod_i \pi_i$ :

$$\begin{aligned} \Phi(\pi_{\text{tot}}) &= \mathbb{E}_{\mathbf{s}, \mathbf{a} \sim \rho_{\text{tot}}^U} \left[ w_{\nu^*}^{\text{tot}}(\mathbf{s}, \mathbf{a}) \log \prod_i \pi_i(a_i|s_i) \right] \\ &= \sum_{i \in \mathcal{N}} \left\{ \mathbb{E}_{\mathbf{s}, \mathbf{a} \sim \rho_{\text{tot}}^U} [w_{\nu^*}^{\text{tot}}(\mathbf{s}, \mathbf{a}) \log \pi_i(a_i|s_i)] \right\} \\ &\stackrel{(a)}{\leq} \sum_{i \in \mathcal{N}} \left\{ \mathbb{E}_{\mathbf{s}, \mathbf{a} \sim \rho_{\text{tot}}^U} [w_{\nu^*}^{\text{tot}}(\mathbf{s}, \mathbf{a}) \log \pi_i^*(a_i|s_i)] \right\} \\ &= \mathbb{E}_{\mathbf{s}, \mathbf{a} \sim \rho_{\text{tot}}^U} [w_{\nu^*}^{\text{tot}}(\mathbf{s}, \mathbf{a}) \log \tilde{\pi}_{\text{tot}}(\mathbf{a}|\mathbf{s})], \end{aligned}$$

596 where  $\tilde{\pi}_{\text{tot}} = \prod_i \pi_i^*$ , and (a) holds because each  $\pi_i^*$  is optimal for the corresponding local WBC  
 597 problem. Thus, we have  $\Phi(\pi_{\text{tot}}) \leq \Phi(\tilde{\pi}_{\text{tot}})$  for any  $\pi_{\text{tot}} \in \Pi$ , implying that  $\tilde{\pi}_{\text{tot}}$  is also optimal for the  
 598 global WBC. This establishes the global-local-consistency, as desired.

599 □

## 600 A.5 Proof of Proposition 5.5

601 *Proposition.* Assume that the joint behavior policy of the union dataset  $\mu^U(\mathbf{a}|\mathbf{s})$  is decomposable  
 602 into local behavior policies  $\mu_i^U(a_i | s_i)$ . Let  $\pi_i^*$  be the optimal solution to the local weighted BC  
 603 objective. Then the optimal local policy can be expressed as:

$$\pi_i^*(a_i | s_i) = \frac{1}{\Delta(s_i)} \exp \left( \frac{\phi_i^*}{1+\alpha} q_i^*(s_i, a_i) + \log \mu_i^U(a_i | s_i) \right),$$

604 where  $\Delta(s_i) = \sum_{a_i \in \mathcal{A}_i} \exp \left( \frac{\phi_i^*}{1+\alpha} q_i^*(s_i, a_i) + \log \mu_i^U(a_i | s_i) \right)$ , is the normalization constant,  
 605 ensuring that  $\pi_i^*(a_i | s_i)$  is a valid probability distribution over the local action space.

606 *Proof.* We first recall that the total weighting function can be written as:

$$w_{\nu^*}^{\text{tot}}(\mathbf{s}, \mathbf{a}) = e^{-1} \exp \left( \frac{1}{1+\alpha} \left( \sum_{i \in \mathcal{N}} \phi_i^* (q_i^*(s_i, a_i) - \nu_i^*(s_i)) + \gamma \phi_0^* \right) \right).$$

607 This allows us to express the local weighted behavior cloning (BC) objective for each agent  $i$  as:

$$\max_{\pi_i} \left\{ \mathbb{E}_{\mathbf{s}, \mathbf{a} \sim \rho_{\text{tot}}^U} [w_{\nu^*}^{\text{tot}}(\mathbf{s}, \mathbf{a}) \log \pi_i(a_i | s_i)] \right\}.$$

608 For each state  $\mathbf{s}$ , the corresponding sub-training objective is:

$$\begin{aligned} &\sum_{\mathbf{a}} \mu^U(\mathbf{a} | \mathbf{s}) [w_{\nu^*}^{\text{tot}}(\mathbf{s}, \mathbf{a}) \log \pi_i(a_i | s_i)] \\ &= \sum_{\mathbf{a}} \prod_i \mu_i^U(a_i | s_i) \left[ \exp \left( \frac{1}{1+\alpha} \left( \sum_{i \in \mathcal{N}} \phi_i^* (q_i^*(s_i, a_i) - \nu_i^*(s_i)) + \gamma \phi_0^* \right) \right) \log \pi_i(a_i | s_i) \right] \\ &= \sum_{\mathbf{a}} \left[ \exp \left( \frac{1}{1+\alpha} \left( \sum_{i \in \mathcal{N}} \phi_i^* q_i^*(s_i, a_i) + (1+\alpha) \log \mu_i^U(a_i | s_i) + \text{const} \right) \right) \log \pi_i(a_i | s_i) \right], \end{aligned}$$

609 where the constant term (including  $\nu_i^*(s_i)$  and  $\phi_0^*$ ) does not depend on  $a_i$ , and thus can be ignored  
 610 for optimizing  $\pi_i$ .

611 Since only terms involving  $a_i$  affect the optimality of the local policy  $\pi_i(a_i | s_i)$ , we isolate the  
 612 relevant part and simplify the training objective for each agent  $i$  as:

$$\sum_{a_i} \left[ \exp \left( \frac{1}{1+\alpha} (\phi_i^* q_i^*(s_i, a_i) + (1+\alpha) \log \mu_i^U(a_i | s_i)) \right) \log \pi_i(a_i | s_i) \right].$$

613 This is a weighted log-likelihood objective, where the weights are shaped by the exponentiated  
 614 advantage-like term. The maximization of this expression yields the following closed-form solution:

$$\pi_i^*(a_i | s_i) = \frac{\mu_i^U(a_i | s_i) \exp \left( \frac{\phi_i^*}{1+\alpha} q_i^*(s_i, a_i) \right)}{\sum_{a'_i} \mu_i^U(a'_i | s_i) \exp \left( \frac{\phi_i^*}{1+\alpha} q_i^*(s_i, a'_i) \right)} = \frac{1}{\Delta(s_i)} \mu_i^U(a_i | s_i) \exp \left( \frac{\phi_i^*}{1+\alpha} q_i^*(s_i, a_i) \right).$$

615 where

$$\Delta(s_i) = \sum_{a_i} \exp\left(\frac{\phi_i^*}{1 + \alpha} q_i^*(s_i, a_i) + \log \mu_i^U(a_i | s_i)\right),$$

616 as desired.

617

□

## 618 B Additional Details

### 619 B.1 Unlabeled Imperfect Dataset

620 A significant challenge in advancing offline multi-agent imitation learning (MAIL) from mixed-  
621 quality data is the lack of standardized benchmarks. Currently, there are no publicly available  
622 datasets that specifically provide suboptimal or imperfect demonstrations tailored for multi-agent  
623 reinforcement learning (MARL) settings. To address this gap and facilitate research in this crucial  
624 area, we constructed our own datasets.

625 Our approach leverages the offline datasets generated by O-MAPL [6]. The O-MAPL framework  
626 contributes a valuable resource by providing distinct datasets categorized by quality - expert, medium,  
627 and poor - for a range of MARL tasks. Specifically, for each task within the MaMujoco, SMACv1,  
628 and SMACv2 environments, O-MAPL offers 1000 trajectories for each quality level (expert, medium,  
629 and poor).

630 For the experiments, we specifically curate a suboptimal dataset designed to test the algorithm’s  
631 ability to learn from mixed-quality demonstrations where the quality is not explicitly labeled. To form  
632 this dataset, we sample 200 expert trajectories and 1000 poor trajectories from the O-MAPL datasets  
633 for each considered task. These selected trajectories are then combined and shuffled thoroughly to  
634 create a single, unlabeled suboptimal dataset. This process ensures that we operate on a dataset that  
635 realistically mirrors scenarios where trajectory quality is heterogeneous and unknown beforehand,  
636 compelling the agent to discern and learn from the more effective behaviors embedded within the  
637 mixed data.

638 We further detail the general framework of using an expert dataset ( $\mathcal{D}^E$ ) and a mixed-quality dataset  
639 ( $\mathcal{D}^{Mix}$ ), with our constructed dataset serving as  $\mathcal{D}^U$  in a setting where expert demonstrations within  
640 this mix are not pre-annotated. The specific MaMujoco and SMAC environments used in our  
641 evaluations are detailed in Table 2.

### 642 B.2 Rule-based vs. LLM-based Trajectory Ranking Techniques

643 To effectively utilize unlabeled datasets in our multi-agent imitation learning framework, a critical  
644 step involves ranking trajectories to identify and select high-quality examples, which then form the  
645 expert dataset ( $\mathcal{D}^E$ ). This ranking is achieved by first learning an O-MAPL (Offline Multi-agent  
646 Preference Learning) model to recover the underlying reward function from pairwise preferences.  
647 Subsequently, these recovered rewards enable the ranking of all trajectories in the unlabeled dataset.

648 The training of O-MAPL necessitates a preference dataset ( $\mathcal{P}$ ) for each task. Each instance in this  
649 dataset consists of a pair of trajectories ( $\sigma_1, \sigma_2$ ) and a label indicating which trajectory is preferred.  
650 Echoing the data generation methodologies in O-MAPL, we construct these crucial preference  
651 datasets using two distinct approaches: a rule-based method and an LLM-based method. For this  
652 purpose, we randomly sample 2,000 trajectory pairs from the unlabeled dataset for each task, and  
653 then apply one of the following methods to assign preference labels.

#### 654 B.2.1 Rule-based Preference Labeling

655 In the rule-based approach, we operate under the assumption that the cumulative return for each  
656 trajectory within a selected pair is known or can be accurately estimated. The preference assignment is  
657 straightforward: the trajectory yielding a higher return is labeled as preferred. This method leverages  
658 the intuition that higher returns often correlate with more successful task completion.

659 However, this rule-based method is not without its limitations, particularly in cooperative multi-  
660 agent settings. The accuracy can be compromised because, in certain scenarios, individual agents  
661 might adopt strategies that maximize their individual rewards without contributing to, or even at

the detriment of, the team’s overall objective and cooperative success. For instance, in complex environments like StarCraft Multi-Agent Challenge (SMAC), which involves cooperative multi-agent gameplay to defeat enemies, agents might excessively focus on attacking enemies to boost their individual reward metrics. Such behavior can lead to a loss of the game due to neglecting crucial strategic elements, such as maintaining adequate health points, armor regeneration, managing weapon cooldowns, or effective unit positioning and coordination. Consequently, a trajectory with a higher summed individual return might not always represent superior cooperative behavior.

### B.2.2 LLM-based Preference Labeling

To introduce more nuanced and potentially more accurate preference signals, we also employ an LLM-based method. For this, we leverage the capabilities of a large language model, specifically GPT-4o, to act as an expert labeler. The goal is to achieve better generalization in preference assessment and thereby increase the accuracy of the subsequent preference learning phase.

Following the methodology described in studies such as O-MAPL for SMAC environments, we construct prompts for the LLM that include detailed information extracted from the global state of each trajectory in a pair. This information typically encompasses key metrics like the remaining health points and shields of allied and enemy units, the number of allied and enemy deaths, relative positions of units, weapon cooldown times, agent types, and the semantics of their actions. The LLM is then tasked to evaluate which trajectory demonstrates superior gameplay or strategy based on this comprehensive contextual information. This approach has shown potential in generating rich and cost-effective preference data, which can significantly enhance environment understanding and policy learning in complex multi-agent tasks. As noted in the MisoDICE framework, LLMs can be instrumental in inferring expert-like segments even from entirely unlabeled trajectory datasets.

### B.2.3 Reward Recovery and Trajectory Ranking

Once the preference datasets are established using either the rule-based or LLM-based method, they are used to train the O-MAPL model. After training O-MAPL, we utilize an inverse preference learning technique, specifically leveraging the relationship  $R = Q - \gamma V$  (an adaptation of the inverse soft Bellman operator,  $r(s, a) = Q_{tot}(s, a) - \gamma \mathbb{E}_{s'} V_{tot}(s')$  as seen in MaxEnt RL frameworks), to

Table 2: Overview of our datasets.

| Instances |                | Trajectories | Samples | Agents | State dim | Obs dim | Action dim |    |
|-----------|----------------|--------------|---------|--------|-----------|---------|------------|----|
| MaMujoco  | Hopper-v2      | 1.2K         | 459.2K  | 3      | 126       | 14      | 1          |    |
|           | Ant-v2         | 1.2K         | 1200K   | 2      | 452       | 113     | 4          |    |
|           | HalfCheetah-v2 | 1.2K         | 1200K   | 6      | 828       | 23      | 1          |    |
| SMACv1    | 2c_vs_64zg     | 1.2K         | 43.2K   | 2      | 1350      | 478     | 70         |    |
|           | 5m_vs_6m       | 1.2K         | 28.3K   | 5      | 780       | 124     | 12         |    |
|           | 6h_vs_8z       | 1.2K         | 31.8K   | 6      | 1278      | 172     | 14         |    |
|           | corridor       | 1.2K         | 71.8K   | 6      | 2610      | 346     | 30         |    |
| SMACv2    | protoss        | 5_vs_5       | 1.2K    | 76.9K  | 5         | 130     | 92         | 11 |
|           |                | 10_vs_10     | 1.2K    | 80.2K  | 10        | 310     | 182        | 16 |
|           |                | 10_vs_11     | 1.2K    | 73.3K  | 10        | 327     | 191        | 17 |
|           |                | 20_vs_20     | 1.2K    | 78.3K  | 20        | 820     | 362        | 26 |
|           |                | 20_vs_23     | 1.2K    | 70.4K  | 20        | 901     | 389        | 29 |
|           | terran         | 5_vs_5       | 1.2K    | 60.6K  | 5         | 120     | 82         | 11 |
|           |                | 10_vs_10     | 1.2K    | 61.7K  | 10        | 290     | 162        | 16 |
|           |                | 10_vs_11     | 1.2K    | 58.2K  | 10        | 306     | 170        | 17 |
|           |                | 20_vs_20     | 1.2K    | 64.7K  | 20        | 780     | 322        | 26 |
|           |                | 20_vs_23     | 1.2K    | 57.1K  | 20        | 858     | 346        | 29 |
|           | zerg           | 5_vs_5       | 1.2K    | 34.3K  | 5         | 120     | 82         | 11 |
|           |                | 10_vs_10     | 1.2K    | 38.1K  | 10        | 290     | 162        | 16 |
|           |                | 10_vs_11     | 1.2K    | 37.3K  | 10        | 306     | 170        | 17 |
|           |                | 20_vs_20     | 1.2K    | 40.5K  | 20        | 780     | 322        | 26 |
|           |                | 20_vs_23     | 1.2K    | 38.5K  | 20        | 858     | 346        | 29 |

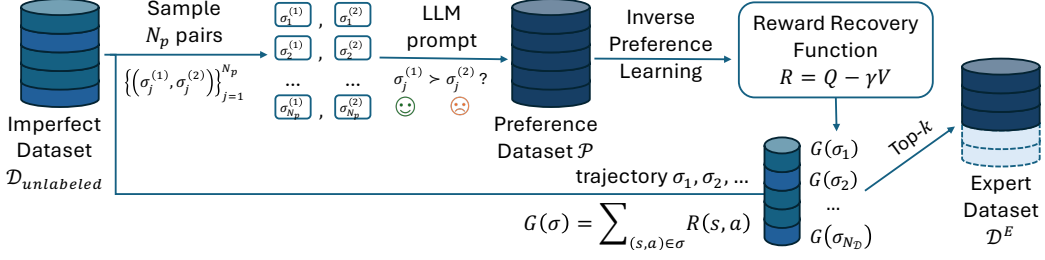

Figure 3: Generalized Expert Dataset Identification via Preference Learning

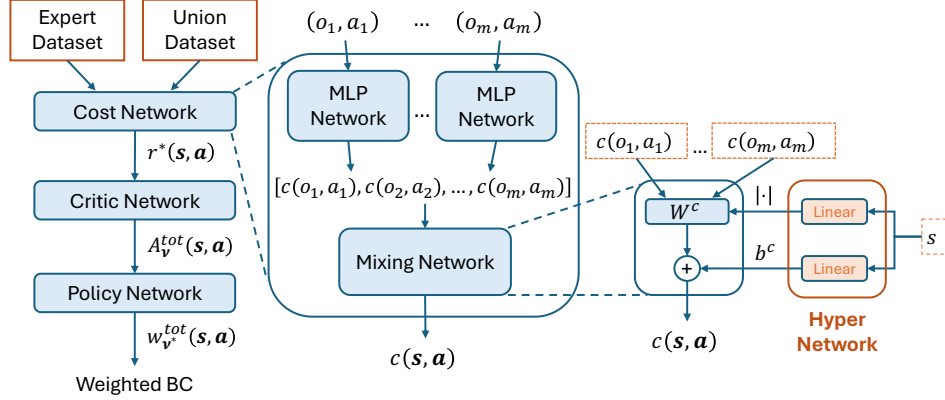

Figure 4: Multi-Agent Imitation Policy Learning

689 recover the reward for each state-action pair within every trajectory in the unlabeled dataset. With  
 690 these recovered rewards, we can then compute the total return for each trajectory and subsequently  
 691 rank all trajectories.

692 Finally, from the ranked lists generated by each of the two preference labeling approaches (rule-based  
 693 and LLM-based), we select the top-ranked trajectories to form the respective expert datasets, denoted  
 694 as  $\mathcal{D}_{\text{rule}}^E$  and  $\mathcal{D}_{\text{LLM}}^E$ . These datasets are then used for the downstream imitation learning process in  
 695 MisoDICE.

### 696 B.3 Baselines

697 To rigorously evaluate MisoDICE, we compare its performance against several key baselines. These  
 698 are selected to assess MisoDICE’s efficacy in multi-agent imitation learning from mixed-quality  
 699 demonstrations and to ablate the contributions of its core components, particularly its learnable  
 700 mixing architecture.

#### 701 B.3.1 Behavioral Cloning (BC) for Mixed-Quality Data ( $\beta = 1.0, 0.5, 0.0$ )

Multi-Agent Behavioral Cloning (MA-BC) serves as a fundamental imitation learning baseline, where individual agent policies  $\pi_i(a_i|o_i)$  are trained via supervised learning to maximize the log-likelihood of demonstrated actions. Following the approach for handling mixed-quality data in DemoDICE, we adapt MA-BC using a coefficient  $\beta$ . This coefficient balances learning between a limited expert dataset ( $D^E$ ) and a larger union dataset ( $D^U = D^E \cup D^{Mix}$ ), where  $D^{Mix}$  contains uncured, potentially suboptimal trajectories. The objective for the set of agent policies is:

$$J_{BC}(\beta) = -\beta \mathbb{E}_{(o,a) \sim D^E} \left[ \sum_{i=1}^N \log \pi_i(a_i|o_i) \right] - (1 - \beta) \mathbb{E}_{(o,a) \sim D^U} \left[ \sum_{i=1}^N \log \pi_i(a_i|o_i) \right]$$

702 We evaluate three variants:

---

**Algorithm 2: MisoDICE: Phase 1 – Expert Dataset Identification via Preference Learning**

---

**Input:** Unlabeled dataset  $\mathcal{D}_{\text{unlabeled}}$ ; O-MAPL parameters  $(\psi_q^{\text{OM}}, \psi_v^{\text{OM}}, \theta^{\text{OM}})$ ; Preference method PrefMethod; Parameters for PrefMethod; Number of preference pairs  $N_p$ ; Number of expert trajectories  $K_{\text{expert}}$

**Output:** Expert dataset  $\mathcal{D}^E$

```
/* 1. Generate Preference Dataset */
1 Sample  $N_p$  trajectory pairs  $\mathcal{S}_{\text{pairs}}$  from  $\mathcal{D}_{\text{unlabeled}}$ ;
2 Generate preference dataset  $\mathcal{P}$  using  $\mathcal{S}_{\text{pairs}}$  and the specified PrefMethod;
/* 2. Train O-MAPL for Reward Recovery */
3 for a number of training steps do
4   | Update O-MAPL parameters  $(\psi_q^{\text{OM}}, \psi_v^{\text{OM}}, \theta^{\text{OM}})$  using  $\mathcal{P}$ ;
5   | Maximize preference likelihood  $\mathcal{L}_{\text{O-MAPL}}$  and minimize Extreme-V loss  $\mathcal{J}_{\text{O-MAPL}}$ ;
/* 3. Recover Rewards and Select Expert Dataset */
6 Estimate  $R(s, a)$  for each  $(s, a) \in \mathcal{D}_{\text{unlabeled}}$  using  $Q^{\text{OM}} - \gamma V^{\text{OM}}$ ;
7 foreach trajectory  $\sigma \in \mathcal{D}_{\text{unlabeled}}$  do
8   | Compute return  $G(\sigma) = \sum_{(s,a) \in \sigma} R(s, a)$ ;
9 Rank all trajectories by  $G(\sigma)$  in descending order;
10 Select top- $K_{\text{expert}}$  trajectories as  $\mathcal{D}^E$ ;
11 return  $\mathcal{D}^E$ 
```

---

- 703 • **BC** ( $\beta = 1.0$ ): This variant imitates expert data ( $\mathcal{D}^E$ ) exclusively. It learns by maximizing  
704 the log-likelihood of actions in the expert dataset.
- 705 • **BC** ( $\beta = 0.5$ ): This provides an equal weighting between expert and mixed data imitation.  
706 It balances learning from the expert dataset and the larger, mixed-quality union dataset.
- 707 • **BC** ( $\beta = 0.0$ ): This variant imitates the entire mixed dataset ( $\mathcal{D}^U$ ) without differentiation.  
708 It learns by maximizing the log-likelihood of actions in the combined expert and suboptimal  
709 dataset.

710 These variants establish a performance benchmark against direct imitation, highlighting how ef-  
711 fectively MisoDICE utilizes mixed-quality data compared to standard BC approaches that merely  
712 re-weight datasets.

### 713 B.3.2 Offline Multi-Agent Preference Learning (OMAPL)

714 This baseline refers to the O-MAPL algorithm, which is an end-to-end preference-based learning  
715 framework for cooperative MARL. O-MAPL directly learns policies from preference data (Phase 1  
716 in MisoDICE context) without explicitly modeling a reward function. It leverages the relationship be-  
717 tween reward functions and soft Q-functions within the MaxEnt RL framework. The learning process  
718 uses a multi-agent value decomposition strategy under the Centralized Training with Decentralized  
719 Execution (CTDE) paradigm. For this baseline, the policy is learned directly from the preference  
720 dataset generated in Phase 1. Comparing MisoDICE to OMAPL is intended to demonstrate the  
721 necessity and benefit of MisoDICE’s Phase 2, which involves reward recovery and policy learning  
722 using the DICE framework.

### 723 B.3.3 Individual DemoDICE (INDD)

724 This baseline applies the single-agent DemoDICE algorithm independently to each agent in the  
725 multi-agent system. DemoDICE is an offline imitation learning algorithm designed to learn from  
726 both expert and imperfect demonstrations by optimizing a policy within the space of stationary  
727 distributions. It achieves this by reducing a potentially unstable minimax optimization problem  
728 to a direct convex optimization. In the INDD baseline, each agent  $i$  independently solves its own  
729 DemoDICE objective. This involves learning a policy  $\pi_i$  by focusing on its individual marginal  
730 stationary distribution derived from  $\mathcal{D}_i^E$  (its portion of expert trajectories) and  $\mathcal{D}_i^U$  (its portion of the  
731 union dataset), without explicit joint state-action modeling or coordinated value/policy learning across  
732 agents. INDD contrasts MisoDICE’s centralized training with value decomposition against a naive

multi-agent extension of the single-agent DemoDICE. This comparison is crucial for demonstrating the benefits of MisoDICE’s joint learning approach and coordinated credit assignment.

### B.3.4 MARL with Supervised Reward (MARL-SL)

This baseline represents MisoDICE using Supervised Learning to learn reward recovery from Phase 1. In this approach, a reward function is first learned via supervised learning techniques from the preference data generated in Phase 1. Then, a MARL algorithm is applied to optimize the policy with respect to this learned reward. This can be seen as a two-phase approach, similar to some existing preference-based RL methods. This baseline helps to evaluate the effectiveness of MisoDICE’s end-to-end DICE-based reward and policy learning in Phase 2 compared to a more decoupled supervised reward learning followed by MARL.

### B.3.5 MisoDICE-VDN

This is an ablated version of our MisoDICE algorithm, where the proposed learnable mixer (with a hypernetwork) is replaced by a standard Value Decomposition Network (VDN) mixer. MisoDICE-VDN retains the core framework of MisoDICE, including its adaptation of DICE principles for multi-agent imitation learning from mixed-quality data. However, for value decomposition, it uses a simple VDN approach where the joint value function (or its DICE-equivalent, such as the global Lagrange multipliers  $\nu^{tot}$  or advantage function  $A_\nu^{tot}$  as seen in DICE literature like ComaDICE) is computed as a direct summation of individual agent values:  $\mathcal{M}(\{\nu_i(o_i)\}) = \sum_i \nu_i(o_i)$ . This is a simpler alternative to MisoDICE’s architecture, which employs a more expressive learnable mixer using a hypernetwork to generate state-dependent mixing weights, similar in spirit to advanced mixers like QMIX or those described in O-MAPL. By comparing MisoDICE against MisoDICE-VDN, we can directly assess the performance impact and importance of MisoDICE’s sophisticated hypernetwork-based mixing architecture.

## B.4 Hyperparameters

Table 3: Hyperparameters used in MisoDICE experiments.

| Hyperparameter                              | Value                                  |
|---------------------------------------------|----------------------------------------|
| Optimizer                                   | Adam                                   |
| Learning rate (actor)                       | 3e-4 (for SMAC)<br>1e-5 (for MaMujoco) |
| Learning rate (critic)                      | 3e-4                                   |
| Tau ( $\tau$ , soft update target rate)     | 0.005                                  |
| Alpha ( $\alpha$ )                          | 0.05                                   |
| Gamma ( $\gamma$ , discount factor)         | 0.99                                   |
| Number of minibatch                         | 512                                    |
| Agent hidden dimension                      | 256                                    |
| Mixer hidden dimension                      | 64                                     |
| Number of seeds                             | 4                                      |
| Number of episodes for each evaluation step | 32                                     |
| Number of epochs                            | 100                                    |

All experiments are implemented using PyTorch and run in parallel on a single NVIDIA® H100 NVL Tensor Core GPU. Given the large size of the offline datasets for each instance, we compress all datasets into the H5 format using the h5py library.

We develop two versions of our MisoDICE agent to accommodate different domain characteristics: one for continuous action spaces (MaMujoco) and another for discrete action spaces (SMACv1 & SMACv2). The primary distinction lies in the output distributions of the policy networks. For continuous control tasks, we employ a Gaussian distribution (`torch.distributions.Normal`) to model the actions. For discrete action environments, we utilize a Categorical distribution (`torch.distributions.Categorical`). Notably, in the discrete version, the probability for each action of an agent is computed by applying a softmax function over the set of currently available actions for that agent, rather than over the entire action space. Consequently, actions not available to

an agent at a given state are assigned a probability of zero. This approach ensures a more accurate calculation of the log-likelihood by the actor.

The hyperparameters used in our experiments are detailed in Table 3.

## B.5 Algorithm

The MisoDICE framework is implemented in two main phases, detailed in Algorithm 2 and Algorithm 3 respectively. The first phase focuses on identifying expert trajectories from an unlabeled dataset, while the second phase performs multi-agent imitation learning using these identified trajectories.

---

### Algorithm 3: MisoDICE: Phase 2 – Multi-Agent Imitation Policy Learning

---

**Input:** Expert dataset  $\mathcal{D}^E$ , unlabeled/mixed dataset  $\mathcal{D}_{\text{unlabeled}}$  (or  $\mathcal{D}^{\text{Mix}}$ ), discriminator networks  $c_k, \eta_{\text{disc}}$ , local value networks  $\nu_k$ , value mixing network  $\phi_{\text{val}}$ , local policy networks  $\eta_k$ , regularization coefficient  $\alpha_{\text{Miso}}$ , learning rates

**Output:** Optimized local policies  $\pi_k(a_k|o_k; \eta_k)$

```

1 Let  $\mathcal{D}^U = \mathcal{D}^E \cup \mathcal{D}_{\text{unlabeled}}$ ;
  /* 1. Train Occupancy Ratio Estimator (Discriminator) */
2 for a number of discriminator training steps do
3   Update  $c_k, \eta_{\text{disc}}$  by optimizing discriminator loss  $J(c, \eta_{\text{disc}})$  using samples from  $\mathcal{D}^E$  and  $\mathcal{D}^U$ ;
  // Ref: MisoDICE Sec 5.3 / Eq. 9
4 Compute log occupancy ratio:  $r^*(s, a) = \log \frac{c^*(s, a)}{1 - c^*(s, a)}$ ;
  /* 2. Train MisoDICE Value Functions */
5 for a number of value function training steps do
6   Update  $\nu_k$  and  $\phi_{\text{val}}$  by minimizing  $\mathcal{L}(\phi_{\text{val}}, \{\nu_k\})$ ;
  // Ref: MisoDICE Sec 5.2 / Eq. 6
7 Compute  $w_{\nu^*}^*(s, a) = \exp\left(\frac{A_{\nu^*}^*(s, a)}{1 + \alpha_{\text{Miso}}} - 1\right)$ ;
  // Ref: MisoDICE Sec 5.2 / Eq. 8
  /* 3. Train MisoDICE Local Policies via Weighted Behavior Cloning */
8 for a number of policy training steps do
9   foreach agent  $k \in \mathcal{N}$  do
10    Update  $\eta_k$  by maximizing weighted BC loss  $\mathcal{L}_{\text{WBC}}(\eta_k | w_{\nu^*}^*(s, a))$  using  $\mathcal{D}^U$ ;
    // Ref: MisoDICE Sec 5.4 / Eq. 11
11 return  $\pi_k(a_k|o_k; \eta_k)$  for  $k = 1, \dots, n$ 

```

---

## B.6 Experiment Setup

This section details the experimental environments and evaluation metrics used to assess the performance of MisoDICE.

### B.6.1 Environments

To comprehensively evaluate MisoDICE, we utilize standard and challenging benchmarks widely adopted in cooperative multi-agent reinforcement learning (MARL) research. These environments are sourced from the Multi-Agent MuJoCo (MaMujoco) suite [11], the StarCraft Multi-Agent Challenge version 1 (SMACv1) [46], and its successor, the StarCraft Multi-Agent Challenge version 2 (SMACv2) [13]. MaMujoco provides continuous control tasks where multiple agents, typically different parts of a single robot, must learn to coordinate their actions to achieve a common goal [11]. These tasks are known for their complex physics-based dynamics. In contrast, SMACv1 and SMACv2 offer discrete action spaces and focus on decentralized micromanagement scenarios derived from the real-time strategy game StarCraft II [46]. In these environments, each combat unit is controlled by an individual agent, and the team must learn cooperative strategies to defeat opponent units controlled by built-in game AI. SMACv2, in particular, introduces increased stochasticity and diversity compared to SMACv1 by incorporating features like randomized start positions and unit types, presenting a more demanding test for MARL algorithms [13]. The selection of these diverse

792 benchmarks allows for testing MisoDICE’s capabilities across different action spaces (continuous for  
793 MaMujoco, discrete for SMAC) and varied cooperative challenges.

## 794 B.6.2 Evaluation Metrics

795 To rigorously evaluate the performance of MisoDICE and compare it against baseline methods, we  
796 use standard evaluation metrics common in MARL research. The primary metrics reported are:

- 797 • **Returns:** This metric measures the average cumulative rewards achieved by the agents across  
798 multiple evaluation episodes. Higher returns generally indicate better policy performance  
799 in maximizing the task-specific objectives. We report the mean and standard deviation of  
800 returns.
- 801 • **Win Rates:** Specifically for competitive or mixed cooperative-competitive environments  
802 like the StarCraft Multi-Agent Challenge (SMAC) tasks, this metric evaluates the percentage  
803 of episodes where the team of agents achieves a win condition against opponents. We report  
804 the mean and standard deviation of win rates.

805 Performance for each method is typically averaged over multiple random seeds to ensure statistical  
806 robustness, and evaluation curves often depict performance trends throughout the training process.  
807 For MisoDICE, evaluations were run for 32 episodes for each evaluation step across 4 seeds.

## 808 C Evaluation

### 809 C.1 Additional Experimental Results

810 In this section, we present the main experimental results evaluating the performance of MisoDICE.  
811 Our evaluation aims to demonstrate MisoDICE’s effectiveness in learning robust multi-agent policies  
812 from mixed-quality demonstrations, particularly focusing on its ability to handle scenarios with  
813 limited or unlabeled expert data. We conduct comprehensive experiments across a range of challeng-  
814 ing cooperative multi-agent benchmarks, including tasks from the StarCraft Multi-Agent Challenge  
815 (SMACv1 and SMACv2) and Multi-Agent MuJoCo (MaMujoco).

816 The results will show that MisoDICE consistently outperforms various strong baselines across these  
817 diverse environments. A key aspect of our evaluation is the comparison of MisoDICE’s performance  
818 when expert trajectories are identified using two distinct approaches: a traditional rule-based ranking  
819 method and, more notably, our proposed LLM-based technique for inferring expert-like segments  
820 from entirely unlabeled datasets. This latter approach showcases a novel application of LLMs  
821 to significantly enhance multi-agent imitation learning in practical settings where explicit expert  
822 annotations are unavailable.

823 We compare MisoDICE against several relevant baselines. These include standard Behavioral Cloning  
824 (BC) variants that imitate different compositions of the available data, an Independent DemoDICE  
825 (INDD) baseline applying single-agent imitation learning to each agent, and a supervised MARL  
826 approach (MARL-SL) that learns a reward function from preferences before policy optimization. Fur-  
827 thermore, we evaluate against OMPL, representing the policy learned directly from the preference  
828 data generated in the first phase of our framework, to highlight the benefits of MisoDICE’s second  
829 phase DICE-based policy learning. An ablated version, MisoDICE-VDN, which uses a simpler value  
830 decomposition network, is also included to demonstrate the efficacy of our proposed learnable mixing  
831 architecture.

832 The tables 4 5 and figures 5 6 7 8 provide detailed quantitative results in terms of average returns  
833 and win rates, alongside learning curves. These results will substantiate MisoDICE’s superior  
834 performance, its robustness to the quality and quantity of expert data, and the significant potential of  
835 leveraging LLMs for expert data identification in the challenging domain of multi-agent imitation  
836 learning from suboptimal demonstrations.

### 837 C.2 Ablation Study 1: Impact of the Number of Identified Expert Trajectories (Top-k)

838 In this ablation study, we investigate the sensitivity of MisoDICE to the number of trajectories  
839 selected to form the expert dataset,  $\mathcal{D}^E$ . As outlined in Algorithm 2, the first phase of MisoDICE



840 involves ranking all trajectories in the unlabeled dataset  $\mathcal{D}_{unlabeled}$  (or  $\mathcal{D}^{Mix}$ ) using a preference-  
841 based model (O-MAPL) trained on LLM-generated (or rule-based) preferences. From this ranked

Table 4: Comparison of final average returns for MisoDICE and baseline methods on SMACv1 and SMACv2 tasks when using an LLM-based preference labeling approach.

|         |            | BC                |                   |                   | OMAPL          | INDD           | MARL-SL        | VDN            | MisoDICE (ours) |
|---------|------------|-------------------|-------------------|-------------------|----------------|----------------|----------------|----------------|-----------------|
|         |            | ( $\beta = 0.0$ ) | ( $\beta = 0.5$ ) | ( $\beta = 1.0$ ) |                |                |                |                |                 |
|         | 2c_vs_64zg | 8.5 $\pm$ 0.1     | 9.7 $\pm$ 0.3     | 12.6 $\pm$ 0.3    | 12.2 $\pm$ 0.4 | 14.6 $\pm$ 1.0 | 14.0 $\pm$ 1.6 | 12.7 $\pm$ 0.6 | 16.4 $\pm$ 1.3  |
|         | 5m_vs_6m   | 5.0 $\pm$ 1.1     | 6.7 $\pm$ 0.0     | 6.1 $\pm$ 0.1     | 5.7 $\pm$ 0.2  | 6.7 $\pm$ 0.1  | 6.8 $\pm$ 0.1  | 6.2 $\pm$ 1.4  | 7.3 $\pm$ 0.1   |
|         | 6h_vs_8z   | 7.0 $\pm$ 0.0     | 7.4 $\pm$ 0.0     | 7.2 $\pm$ 0.1     | 6.6 $\pm$ 0.2  | 7.5 $\pm$ 0.2  | 7.8 $\pm$ 0.1  | 8.2 $\pm$ 0.2  | 8.7 $\pm$ 0.2   |
|         | corridor   | 1.5 $\pm$ 0.1     | 1.5 $\pm$ 0.2     | 4.3 $\pm$ 0.7     | 2.2 $\pm$ 1.3  | 4.4 $\pm$ 1.2  | 1.8 $\pm$ 0.2  | 4.7 $\pm$ 0.6  | 5.8 $\pm$ 0.8   |
| Protoss | 5_vs_5     | 9.2 $\pm$ 0.1     | 11.7 $\pm$ 0.5    | 10.2 $\pm$ 0.5    | 9.6 $\pm$ 1.1  | 10.9 $\pm$ 0.1 | 11.6 $\pm$ 0.3 | 11.5 $\pm$ 0.2 | 12.4 $\pm$ 0.5  |
|         | 10_vs_10   | 10.3 $\pm$ 0.6    | 11.8 $\pm$ 0.5    | 10.6 $\pm$ 0.2    | 10.1 $\pm$ 0.9 | 11.0 $\pm$ 0.7 | 11.9 $\pm$ 0.4 | 12.4 $\pm$ 0.2 | 12.9 $\pm$ 0.2  |
|         | 10_vs_11   | 8.2 $\pm$ 0.4     | 9.6 $\pm$ 0.4     | 8.7 $\pm$ 0.3     | 8.5 $\pm$ 1.2  | 9.4 $\pm$ 0.4  | 9.9 $\pm$ 0.3  | 10.4 $\pm$ 0.1 | 10.7 $\pm$ 0.4  |
|         | 20_vs_20   | 10.1 $\pm$ 0.2    | 10.4 $\pm$ 0.5    | 10.5 $\pm$ 0.3    | 9.4 $\pm$ 0.4  | 11.4 $\pm$ 0.5 | 13.1 $\pm$ 0.4 | 12.1 $\pm$ 0.5 | 13.5 $\pm$ 0.5  |
|         | 20_vs_23   | 8.1 $\pm$ 0.2     | 8.6 $\pm$ 0.3     | 8.3 $\pm$ 0.2     | 7.9 $\pm$ 0.3  | 9.6 $\pm$ 0.3  | 9.6 $\pm$ 0.3  | 10.3 $\pm$ 0.4 | 10.6 $\pm$ 0.2  |
| Terran  | 5_vs_5     | 6.5 $\pm$ 0.8     | 8.1 $\pm$ 0.5     | 7.1 $\pm$ 0.6     | 6.2 $\pm$ 0.6  | 7.9 $\pm$ 0.5  | 8.1 $\pm$ 0.4  | 8.3 $\pm$ 1.0  | 9.1 $\pm$ 0.3   |
|         | 10_vs_10   | 6.6 $\pm$ 0.3     | 7.4 $\pm$ 0.4     | 6.7 $\pm$ 0.6     | 6.9 $\pm$ 1.1  | 7.6 $\pm$ 0.4  | 7.7 $\pm$ 0.2  | 8.0 $\pm$ 0.4  | 9.1 $\pm$ 1.3   |
|         | 10_vs_11   | 4.7 $\pm$ 0.2     | 5.7 $\pm$ 0.3     | 5.2 $\pm$ 0.3     | 4.2 $\pm$ 0.6  | 5.7 $\pm$ 0.5  | 5.7 $\pm$ 0.4  | 6.0 $\pm$ 0.2  | 6.4 $\pm$ 0.5   |
|         | 20_vs_20   | 6.9 $\pm$ 0.4     | 7.9 $\pm$ 0.8     | 6.7 $\pm$ 0.2     | 6.9 $\pm$ 0.5  | 8.0 $\pm$ 0.5  | 8.6 $\pm$ 0.3  | 8.2 $\pm$ 0.5  | 9.2 $\pm$ 0.6   |
|         | 20_vs_23   | 4.0 $\pm$ 0.3     | 5.1 $\pm$ 0.4     | 4.3 $\pm$ 0.3     | 4.3 $\pm$ 0.4  | 5.1 $\pm$ 0.4  | 5.1 $\pm$ 0.6  | 5.6 $\pm$ 0.3  | 5.6 $\pm$ 0.4   |
| Zerg    | 5_vs_5     | 5.7 $\pm$ 0.5     | 6.6 $\pm$ 0.4     | 5.9 $\pm$ 0.3     | 6.1 $\pm$ 0.5  | 6.4 $\pm$ 0.2  | 7.1 $\pm$ 0.5  | 7.1 $\pm$ 0.9  | 7.5 $\pm$ 0.1   |
|         | 10_vs_10   | 7.3 $\pm$ 0.1     | 8.7 $\pm$ 0.6     | 7.4 $\pm$ 0.7     | 6.8 $\pm$ 0.6  | 8.2 $\pm$ 0.2  | 9.0 $\pm$ 0.4  | 9.7 $\pm$ 0.5  | 10.2 $\pm$ 0.6  |
|         | 10_vs_11   | 7.3 $\pm$ 0.2     | 8.3 $\pm$ 0.4     | 7.3 $\pm$ 0.5     | 7.2 $\pm$ 0.4  | 8.0 $\pm$ 0.2  | 8.8 $\pm$ 0.4  | 9.1 $\pm$ 0.2  | 9.4 $\pm$ 0.3   |
|         | 20_vs_20   | 7.4 $\pm$ 0.6     | 9.0 $\pm$ 0.5     | 7.7 $\pm$ 0.2     | 6.9 $\pm$ 0.5  | 8.3 $\pm$ 0.4  | 8.8 $\pm$ 0.6  | 9.0 $\pm$ 0.5  | 10.2 $\pm$ 0.6  |
|         | 20_vs_23   | 7.1 $\pm$ 0.3     | 7.9 $\pm$ 0.3     | 7.0 $\pm$ 0.2     | 7.1 $\pm$ 0.4  | 8.2 $\pm$ 0.4  | 8.8 $\pm$ 0.2  | 8.7 $\pm$ 0.5  | 9.5 $\pm$ 0.2   |

Table 5: Comparison of final average win rates for MisoDICE and baseline methods on SMACv1 and SMACv2 tasks when using an LLM-based preference labeling approach.

|         |            | BC                |                   |                   | OMAPL           | INDD           | MARL-SL        | VDN            | MisoDICE (ours) |
|---------|------------|-------------------|-------------------|-------------------|-----------------|----------------|----------------|----------------|-----------------|
|         |            | ( $\beta = 0.0$ ) | ( $\beta = 0.5$ ) | ( $\beta = 1.0$ ) |                 |                |                |                |                 |
|         | 2c_vs_64zg | 0.2 $\pm$ 0.2     | 0.5 $\pm$ 0.3     | 8.9 $\pm$ 2.9     | 3.9 $\pm$ 3.4   | 11.7 $\pm$ 5.5 | 10.6 $\pm$ 6.0 | 2.7 $\pm$ 1.5  | 13.0 $\pm$ 9.0  |
|         | 5m_vs_6m   | 0.2 $\pm$ 0.4     | 0.9 $\pm$ 0.6     | 0.1 $\pm$ 0.1     | 0.0 $\pm$ 0.0   | 0.2 $\pm$ 0.2  | 1.1 $\pm$ 0.8  | 0.9 $\pm$ 0.9  | 1.2 $\pm$ 0.5   |
|         | 6h_vs_8z   | 0.2 $\pm$ 0.2     | 0.0 $\pm$ 0.0     | 0.2 $\pm$ 0.3     | 0.0 $\pm$ 0.0   | 0.1 $\pm$ 0.1  | 1.0 $\pm$ 0.6  | 1.2 $\pm$ 0.1  | 1.1 $\pm$ 0.8   |
|         | corridor   | 0.1 $\pm$ 0.1     | 0.6 $\pm$ 0.7     | 0.3 $\pm$ 0.4     | 0.0 $\pm$ 0.0   | 0.1 $\pm$ 0.1  | 0.9 $\pm$ 0.6  | 0.7 $\pm$ 0.7  | 1.4 $\pm$ 0.6   |
| Protoss | 5_vs_5     | 13.8 $\pm$ 2.7    | 17.5 $\pm$ 3.8    | 14.2 $\pm$ 2.4    | 14.1 $\pm$ 10.2 | 12.4 $\pm$ 3.1 | 15.6 $\pm$ 4.5 | 10.8 $\pm$ 1.6 | 20.7 $\pm$ 0.9  |
|         | 10_vs_10   | 12.1 $\pm$ 2.3    | 12.7 $\pm$ 0.9    | 11.3 $\pm$ 2.9    | 11.7 $\pm$ 3.4  | 8.9 $\pm$ 1.4  | 11.8 $\pm$ 4.3 | 9.5 $\pm$ 1.7  | 14.1 $\pm$ 2.1  |
|         | 10_vs_11   | 2.1 $\pm$ 0.9     | 3.5 $\pm$ 2.0     | 1.8 $\pm$ 0.6     | 0.8 $\pm$ 1.4   | 2.0 $\pm$ 0.4  | 3.5 $\pm$ 0.3  | 2.9 $\pm$ 0.9  | 4.7 $\pm$ 0.3   |
|         | 20_vs_20   | 4.5 $\pm$ 1.8     | 3.4 $\pm$ 1.9     | 7.0 $\pm$ 2.5     | 3.1 $\pm$ 3.8   | 5.2 $\pm$ 1.3  | 8.6 $\pm$ 2.0  | 5.2 $\pm$ 1.9  | 11.0 $\pm$ 3.2  |
|         | 20_vs_23   | 1.5 $\pm$ 0.8     | 0.8 $\pm$ 0.4     | 1.8 $\pm$ 0.8     | 0.8 $\pm$ 1.4   | 2.4 $\pm$ 0.9  | 2.0 $\pm$ 0.9  | 2.6 $\pm$ 1.0  | 3.8 $\pm$ 2.0   |
| Terran  | 5_vs_5     | 10.1 $\pm$ 2.3    | 12.8 $\pm$ 1.3    | 13.7 $\pm$ 3.5    | 10.2 $\pm$ 4.6  | 10.6 $\pm$ 1.3 | 9.7 $\pm$ 1.9  | 10.4 $\pm$ 3.2 | 14.2 $\pm$ 3.1  |
|         | 10_vs_10   | 7.3 $\pm$ 2.0     | 7.7 $\pm$ 2.2     | 7.9 $\pm$ 2.4     | 9.4 $\pm$ 3.8   | 8.0 $\pm$ 2.4  | 8.2 $\pm$ 1.6  | 7.0 $\pm$ 1.9  | 12.0 $\pm$ 1.7  |
|         | 10_vs_11   | 1.9 $\pm$ 0.8     | 3.1 $\pm$ 1.4     | 2.5 $\pm$ 1.1     | 0.8 $\pm$ 1.4   | 1.8 $\pm$ 0.5  | 2.6 $\pm$ 1.2  | 2.4 $\pm$ 0.8  | 4.2 $\pm$ 1.6   |
|         | 20_vs_20   | 4.5 $\pm$ 1.3     | 7.4 $\pm$ 2.5     | 4.4 $\pm$ 0.6     | 4.7 $\pm$ 3.5   | 5.8 $\pm$ 0.7  | 7.1 $\pm$ 1.4  | 4.5 $\pm$ 1.5  | 8.8 $\pm$ 1.5   |
|         | 20_vs_23   | 0.6 $\pm$ 1.0     | 1.2 $\pm$ 0.9     | 0.7 $\pm$ 0.7     | 0.0 $\pm$ 0.0   | 0.8 $\pm$ 0.4  | 1.3 $\pm$ 0.7  | 1.3 $\pm$ 1.2  | 1.8 $\pm$ 1.4   |
| Zerg    | 5_vs_5     | 6.2 $\pm$ 0.8     | 5.6 $\pm$ 1.1     | 5.9 $\pm$ 0.5     | 6.2 $\pm$ 5.8   | 6.0 $\pm$ 1.4  | 6.7 $\pm$ 1.1  | 7.0 $\pm$ 1.8  | 7.9 $\pm$ 1.0   |
|         | 10_vs_10   | 4.5 $\pm$ 1.4     | 6.9 $\pm$ 1.8     | 5.0 $\pm$ 1.8     | 3.9 $\pm$ 3.4   | 4.6 $\pm$ 1.0  | 5.7 $\pm$ 1.2  | 5.2 $\pm$ 0.6  | 8.9 $\pm$ 2.1   |
|         | 10_vs_11   | 5.7 $\pm$ 1.9     | 5.8 $\pm$ 1.9     | 5.2 $\pm$ 1.3     | 2.3 $\pm$ 1.4   | 4.7 $\pm$ 1.6  | 6.0 $\pm$ 1.9  | 3.4 $\pm$ 0.7  | 6.8 $\pm$ 1.1   |
|         | 20_vs_20   | 0.8 $\pm$ 0.9     | 1.5 $\pm$ 0.6     | 1.3 $\pm$ 0.8     | 0.0 $\pm$ 0.0   | 0.2 $\pm$ 0.2  | 1.2 $\pm$ 0.5  | 0.6 $\pm$ 0.2  | 2.4 $\pm$ 0.6   |
|         | 20_vs_23   | 1.2 $\pm$ 0.9     | 0.7 $\pm$ 0.3     | 1.2 $\pm$ 0.6     | 1.6 $\pm$ 1.6   | 1.4 $\pm$ 0.5  | 1.9 $\pm$ 0.9  | 1.8 $\pm$ 1.1  | 2.7 $\pm$ 0.4   |

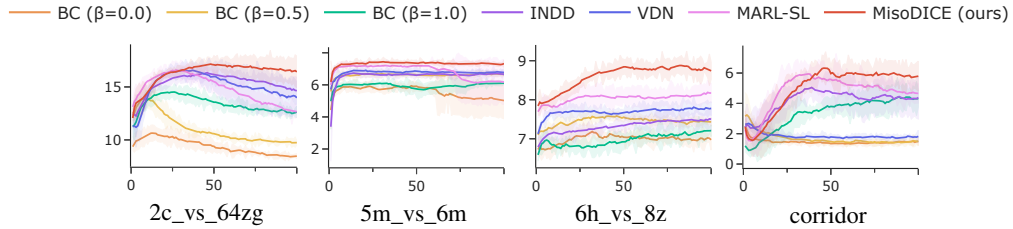

Figure 5: Learning curves of the average return for MisoDICE and baseline methods on SMACv1 tasks when using an LLM-based preference labeling approach.

list, the top- $K_{expert}$  trajectories are selected to constitute the expert dataset  $\mathcal{D}^E$ , which is then used  
 alongside the full mixed dataset  $\mathcal{D}^U$  in the second phase for policy learning.

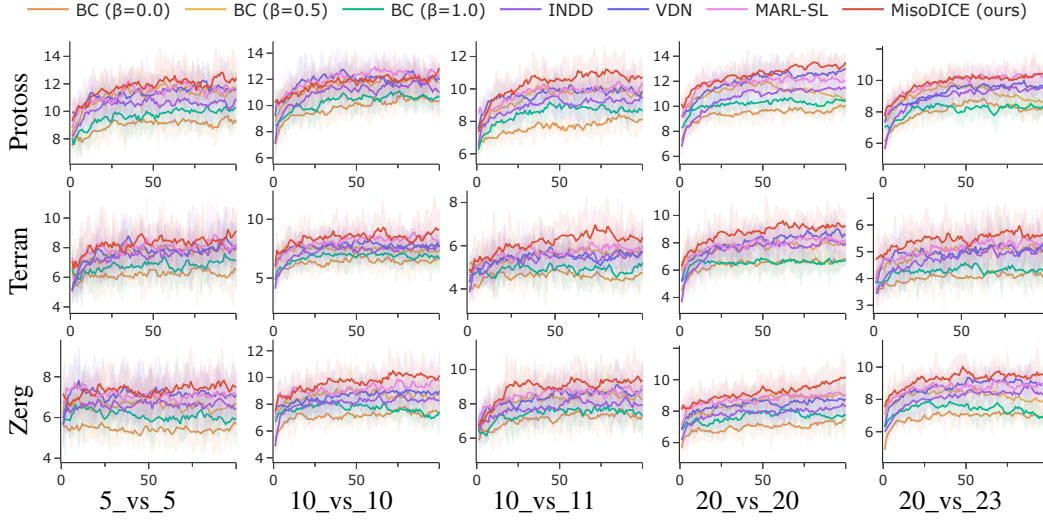

Figure 6: Learning curves of the average return for MisoDICE and baseline methods on SMACv2 tasks when using an LLM-based preference labeling approach.

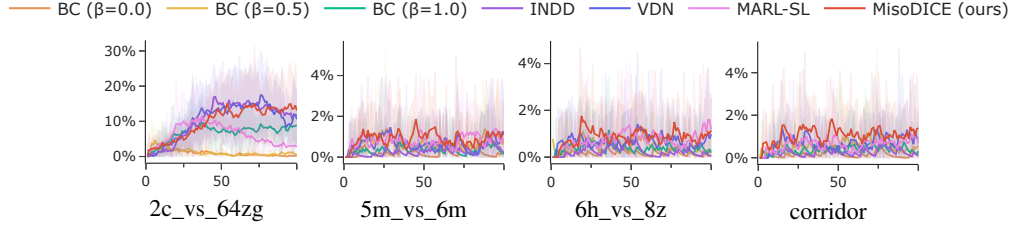

Figure 7: Learning curves of the average win rates for MisoDICE and baseline methods on SMACv1 tasks when using an LLM-based preference labeling approach.

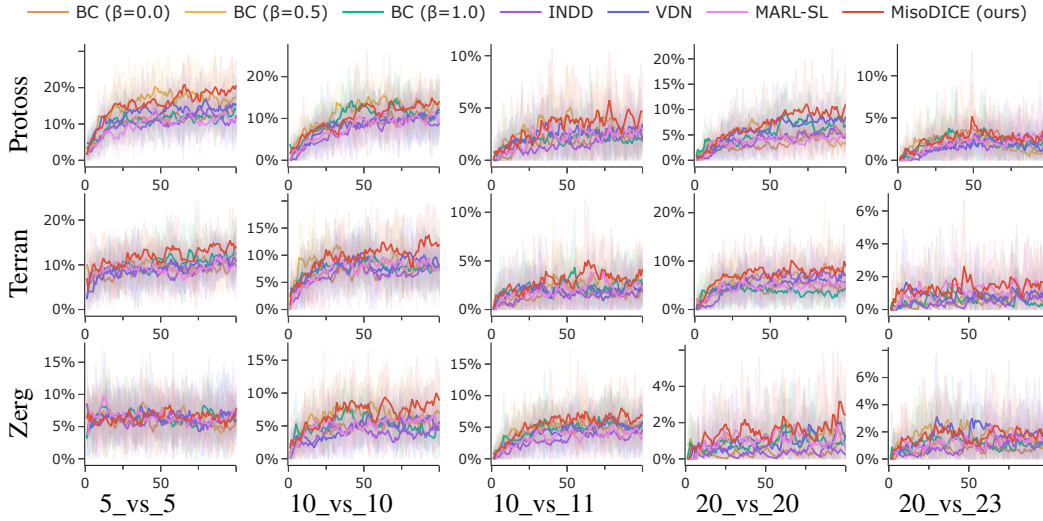

Figure 8: Learning curves of the average win rates for MisoDICE and baseline methods on SMACv2 tasks when using an LLM-based preference labeling approach.

844 The choice of  $K_{expert}$  (referred to as "top-k") is critical. A smaller  $K_{expert}$  might yield a higher-purity  
845 expert dataset but could be too limited, potentially missing some useful expert behaviors. Conversely,  
846 a larger  $K_{expert}$  might include a more diverse set of expert behaviors but risks incorporating more sub-  
847 optimal trajectories, thereby degrading the quality of  $\mathcal{D}^E$ . This study examines how varying  $K_{expert}$   
848 affects the final performance of MisoDICE. We evaluate MisoDICE's performance (in terms of returns  
849 and win rates) across a range of  $K_{expert}$  values, specifically  $K_{expert} \in \{50, 200, 400, 800, 1200\}$ ,  
850 using the LLM-based trajectory ranking method. The results, detailed in Table 6 and Table 7 (and  
851 visualized in Figure 9 11 and Figure 10 12), provide insights into the robustness of MisoDICE to the  
852 size and composition of the automatically curated expert dataset. This helps understand the trade-  
853 offs involved in selecting  $K_{expert}$  and its impact on learning effective policies from mixed-quality  
854 demonstrations.

Table 6: Ablation Study 1: Final average returns for MisoDICE on SMACv1 and SMACv2 tasks, varying the number of top-k expert trajectories ( $K_{expert}$ ) selected via LLM-based preference labeling.

|            | topk=50    | topk=200   | topk=400   | topk=800   | topk=1200  |            |
|------------|------------|------------|------------|------------|------------|------------|
| 2c_vs_64zg | 11.8 ± 1.4 | 16.4 ± 1.3 | 9.7 ± 0.1  | 10.8 ± 0.7 | 10.4 ± 0.5 |            |
| 5m_vs_6m   | 6.9 ± 0.4  | 7.3 ± 0.1  | 6.8 ± 0.2  | 6.5 ± 0.1  | 6.4 ± 0.2  |            |
| 6h_vs_8z   | 7.9 ± 0.1  | 8.7 ± 0.2  | 7.8 ± 0.2  | 7.5 ± 0.1  | 7.3 ± 0.1  |            |
| corridor   | 3.1 ± 1.0  | 5.8 ± 0.8  | 1.9 ± 0.1  | 1.7 ± 0.2  | 1.7 ± 0.1  |            |
| Protoss    | 5_vs_5     | 11.9 ± 0.2 | 12.4 ± 0.5 | 11.3 ± 0.2 | 10.9 ± 0.2 | 10.9 ± 0.5 |
|            | 10_vs_10   | 11.8 ± 0.1 | 12.9 ± 0.2 | 12.1 ± 0.3 | 11.5 ± 0.3 | 11.2 ± 0.4 |
|            | 10_vs_11   | 9.6 ± 0.1  | 10.7 ± 0.4 | 9.5 ± 0.3  | 9.3 ± 0.5  | 9.2 ± 0.3  |
|            | 20_vs_20   | 11.4 ± 0.5 | 13.5 ± 0.5 | 12.1 ± 0.1 | 11.4 ± 0.3 | 11.2 ± 0.3 |
|            | 20_vs_23   | 9.8 ± 0.3  | 10.6 ± 0.2 | 10.0 ± 0.2 | 9.3 ± 0.2  | 8.7 ± 0.4  |
| Terran     | 5_vs_5     | 8.0 ± 0.3  | 9.1 ± 0.3  | 7.3 ± 0.4  | 7.7 ± 0.4  | 7.0 ± 0.5  |
|            | 10_vs_10   | 8.4 ± 0.4  | 9.1 ± 1.3  | 8.1 ± 0.5  | 7.6 ± 0.7  | 7.0 ± 0.4  |
|            | 10_vs_11   | 5.5 ± 0.1  | 6.4 ± 0.5  | 6.1 ± 0.2  | 5.7 ± 0.4  | 5.4 ± 0.5  |
|            | 20_vs_20   | 8.0 ± 0.4  | 9.2 ± 0.6  | 8.2 ± 0.6  | 8.0 ± 0.5  | 7.9 ± 0.5  |
|            | 20_vs_23   | 5.1 ± 0.2  | 5.6 ± 0.4  | 5.1 ± 0.2  | 5.2 ± 0.2  | 4.8 ± 0.2  |
| Zerg       | 5_vs_5     | 7.4 ± 0.4  | 7.5 ± 0.1  | 6.9 ± 0.5  | 6.4 ± 0.5  | 6.2 ± 0.5  |
|            | 10_vs_10   | 9.2 ± 0.3  | 10.2 ± 0.6 | 9.0 ± 0.3  | 8.8 ± 0.2  | 8.3 ± 0.2  |
|            | 10_vs_11   | 8.5 ± 0.4  | 9.4 ± 0.3  | 8.5 ± 0.0  | 8.2 ± 0.2  | 7.6 ± 0.3  |
|            | 20_vs_20   | 8.9 ± 0.1  | 10.2 ± 0.6 | 8.8 ± 0.9  | 8.3 ± 0.5  | 8.1 ± 0.6  |
|            | 20_vs_23   | 8.4 ± 0.4  | 9.5 ± 0.2  | 8.8 ± 0.2  | 8.5 ± 0.2  | 8.0 ± 0.1  |

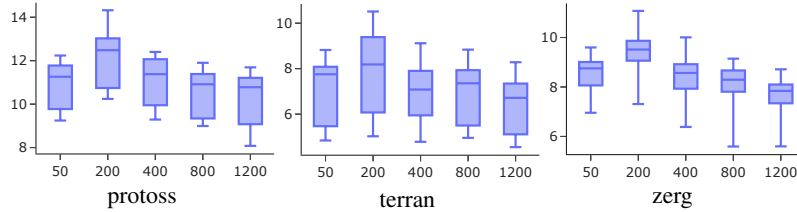

Figure 9: Ablation Study 1: Box plots of final average returns for MisoDICE on SMACv2 tasks, showing the impact of varying the number of top-k expert trajectories ( $K_{expert}$ ) selected via LLM-based preference labeling. Results are presented for Protoss, Terran, and Zerg game races.

### 855 C.3 Ablation Study 2: Impact of the Suboptimal Data Influence Hyperparameter

856 In this ablation study, we examine the influence of the hyperparameter  $\alpha$  on the performance of  
857 MisoDICE. As defined in our learning objective (Equation 2),  $\alpha$  plays a crucial role by controlling the  
858 relative importance of the union dataset  $\mathcal{D}^U$  (composed of both expert  $\mathcal{D}^E$  and mixed-quality  $\mathcal{D}^{Mix}$   
859 trajectories) compared to the purely expert dataset  $\mathcal{D}^E$ . Specifically, the term  $\alpha D_{KL}(\rho_{tot}^\pi || \rho_{tot}^U)$   
860 encourages the learned policy  $\pi_{tot}$  to remain close to the overall distribution of the union dataset,  
861 while the  $D_{KL}(\rho_{tot}^\pi || \rho_{tot}^E)$  term pushes the policy to mimic the identified expert behaviors.

862 The choice of  $\alpha$  therefore dictates how MisoDICE balances learning from the potentially limited  
863 but higher-quality expert demonstrations against leveraging the broader, though more suboptimal,

864 data distribution of the union dataset. A small  $\alpha$  would emphasize strict imitation of  $\mathcal{D}^E$ , potentially  
865 suffering if  $\mathcal{D}^E$  is very scarce or narrowly focused. Conversely, a large  $\alpha$  would regularize the  
866 policy more strongly towards the mixed-quality data in  $\mathcal{D}^U$ , which could be beneficial for broader  
867 state-action coverage but risks learning suboptimal behaviors if the quality of  $\mathcal{D}^U$  is low overall.

868 This study investigates MisoDICE’s sensitivity to different values of  $\alpha \in \{0.00, 0.05, 0.10, 0.50,$   
869  $1.00, 10.0\}$ . By evaluating the algorithm’s performance (returns and win rates) across this range,  
870 as detailed in Table 8 and Table 9, we aim to understand the optimal balance and the robustness of  
871 MisoDICE to this critical hyperparameter when learning from demonstrations of varying quality. Our  
872 findings also help to validate the choice of  $\alpha = 0.05$  used in our main experiments (see Table 3).

#### 873 C.4 Ablation Study 3: Comparison of LLM Capabilities for Preference Labeling

874 A core component of MisoDICE, particularly when expert demonstrations are not pre-annotated,  
875 is the utilization of Large Language Models (LLMs) to infer expert-like segments from unlabeled  
876 trajectories. This is achieved in the first phase by using an LLM to generate preference labels for  
877 pairs of trajectories, which then informs the O-MAPL model to rank demonstrations and identify the  
878 expert dataset  $\mathcal{D}^E$ .

879 In this ablation study, we investigate the impact of the chosen LLM’s capability on the overall  
880 performance of MisoDICE. Specifically, we compare the results when using two different versions  
881 of OpenAI’s models for the preference labeling task: the more powerful GPT-4o and its smaller,  
882 potentially more efficient counterpart, GPT-4o-mini [39]. The motivation is to assess whether the

Table 7: Ablation Study 1: Final average win rates for MisoDICE on SMACv1 and SMACv2 tasks, varying the number of top-k expert trajectories ( $K_{\text{expert}}$ ) selected via LLM-based preference labeling.

|                                                                   |  | topk=50       | topk=200       | topk=400       | topk=800       | topk=1200     |
|-------------------------------------------------------------------|--|---------------|----------------|----------------|----------------|---------------|
| 2c_vs_64zg<br>5m_vs_6m<br>6h_vs_8z<br>corridor                    |  | $5.6 \pm 4.9$ | $13.0 \pm 9.0$ | $1.6 \pm 0.7$  | $1.7 \pm 0.8$  | $0.6 \pm 0.7$ |
|                                                                   |  | $0.0 \pm 0.0$ | $1.2 \pm 0.5$  | $0.0 \pm 0.0$  | $0.0 \pm 0.0$  | $0.0 \pm 0.0$ |
|                                                                   |  | $0.0 \pm 0.0$ | $1.1 \pm 0.8$  | $0.0 \pm 0.0$  | $0.0 \pm 0.0$  | $0.0 \pm 0.0$ |
|                                                                   |  | $0.0 \pm 0.0$ | $1.4 \pm 0.6$  | $0.0 \pm 0.0$  | $0.0 \pm 0.0$  | $0.0 \pm 0.0$ |
|                                                                   |  |               |                |                |                |               |
|                                                                   |  |               |                |                |                |               |
| Protoss<br>5_vs_5<br>10_vs_10<br>10_vs_11<br>20_vs_20<br>20_vs_23 |  | $8.9 \pm 1.9$ | $20.7 \pm 0.9$ | $10.1 \pm 2.8$ | $12.5 \pm 1.7$ | $9.4 \pm 1.7$ |
|                                                                   |  | $5.3 \pm 1.8$ | $14.1 \pm 2.1$ | $11.1 \pm 3.3$ | $10.0 \pm 3.0$ | $5.7 \pm 1.6$ |
|                                                                   |  | $0.3 \pm 0.4$ | $4.7 \pm 0.3$  | $2.2 \pm 1.2$  | $2.0 \pm 1.0$  | $1.6 \pm 0.6$ |
|                                                                   |  | $2.8 \pm 0.8$ | $11.0 \pm 3.2$ | $3.6 \pm 1.4$  | $6.1 \pm 1.9$  | $3.4 \pm 0.9$ |
|                                                                   |  | $0.6 \pm 0.4$ | $3.8 \pm 2.0$  | $2.2 \pm 0.8$  | $1.8 \pm 1.2$  | $1.0 \pm 0.4$ |
|                                                                   |  |               |                |                |                |               |
| Terran<br>5_vs_5<br>10_vs_10<br>10_vs_11<br>20_vs_20<br>20_vs_23  |  | $8.5 \pm 1.9$ | $14.2 \pm 3.1$ | $9.8 \pm 2.1$  | $10.4 \pm 2.1$ | $5.1 \pm 1.1$ |
|                                                                   |  | $7.7 \pm 0.6$ | $12.0 \pm 1.7$ | $7.9 \pm 2.1$  | $8.1 \pm 3.8$  | $5.2 \pm 0.3$ |
|                                                                   |  | $0.8 \pm 0.6$ | $4.2 \pm 1.6$  | $2.2 \pm 1.2$  | $1.4 \pm 0.9$  | $0.6 \pm 0.4$ |
|                                                                   |  | $3.7 \pm 0.4$ | $8.8 \pm 1.5$  | $4.3 \pm 0.6$  | $6.0 \pm 1.6$  | $5.2 \pm 1.2$ |
|                                                                   |  | $0.5 \pm 0.3$ | $1.8 \pm 1.4$  | $0.6 \pm 0.6$  | $0.3 \pm 0.4$  | $0.1 \pm 0.1$ |
|                                                                   |  |               |                |                |                |               |
| Zerg<br>5_vs_5<br>10_vs_10<br>10_vs_11<br>20_vs_20<br>20_vs_23    |  | $5.6 \pm 1.3$ | $7.9 \pm 1.0$  | $5.3 \pm 1.1$  | $4.7 \pm 1.6$  | $3.8 \pm 0.6$ |
|                                                                   |  | $3.4 \pm 1.7$ | $8.9 \pm 2.1$  | $5.6 \pm 1.5$  | $6.7 \pm 1.1$  | $3.5 \pm 1.0$ |
|                                                                   |  | $2.5 \pm 1.0$ | $6.8 \pm 1.1$  | $4.6 \pm 1.6$  | $4.5 \pm 1.3$  | $2.8 \pm 0.6$ |
|                                                                   |  | $0.3 \pm 0.3$ | $2.4 \pm 0.6$  | $0.3 \pm 0.3$  | $0.4 \pm 0.5$  | $0.3 \pm 0.3$ |
|                                                                   |  | $0.6 \pm 0.3$ | $2.7 \pm 0.4$  | $1.4 \pm 0.7$  | $1.1 \pm 1.0$  | $1.2 \pm 0.7$ |
|                                                                   |  |               |                |                |                |               |

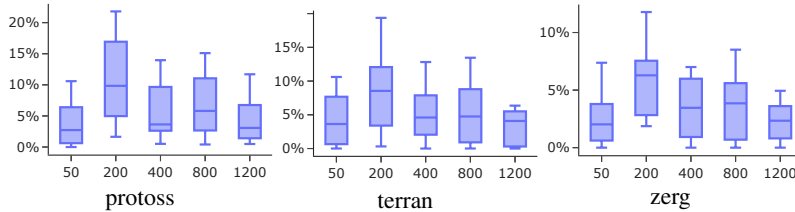

Figure 10: Ablation Study 1: Box plots of final average win rates for MisoDICE on SMACv2 tasks, showing the impact of varying the number of top-k expert trajectories ( $K_{\text{expert}}$ ) selected via LLM-based preference labeling. Results are presented for Protoss, Terran, and Zerg game races.

enhanced reasoning capabilities of a larger model like GPT-4o translate into significantly better preference data and, consequently, improved downstream imitation learning performance for MisoDICE, or if a more compact model like GPT-4o-mini can provide comparable results with potentially lower computational and financial costs.

We evaluate MisoDICE’s final performance, in terms of returns and win rates, on our benchmark tasks when the initial preference labeling (Phase 1) is conducted by GPT-4o versus GPT-4o-mini. The comparative results, presented in Table 10, will shed light on the trade-offs associated with LLM selection for data annotation in the MisoDICE framework and provide insights into the level of LLM sophistication required for effective multi-agent imitation learning from unlabeled demonstrations.

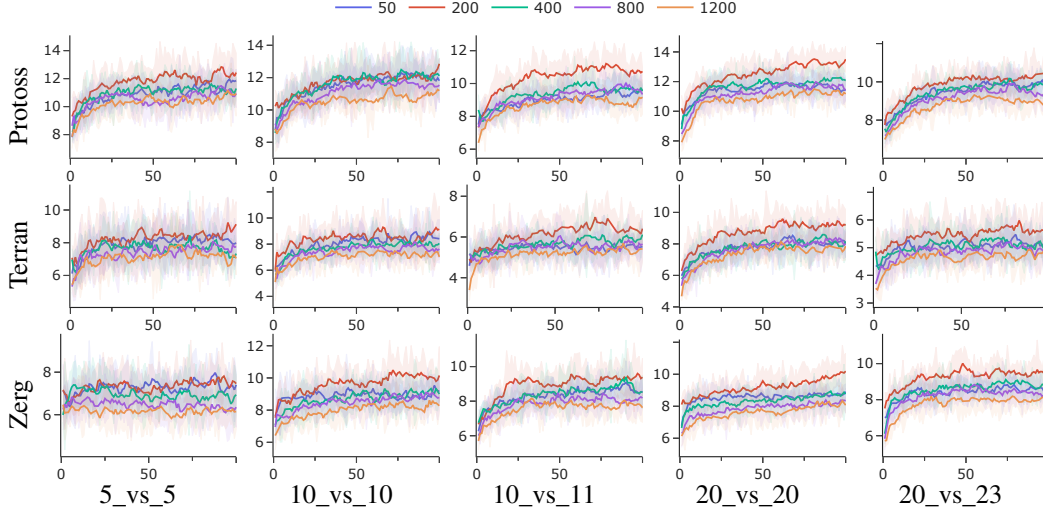

Figure 11: Ablation Study 1: Learning curves of average returns for MisoDICE on SMACv2 tasks, illustrating the impact of varying the number of top-k expert trajectories ( $K_{\text{expert}}$ ) selected via LLM-based preference labeling. Each curve corresponds to a different  $K_{\text{expert}}$  value from the set  $\{50, 200, 400, 800, 1200\}$ .

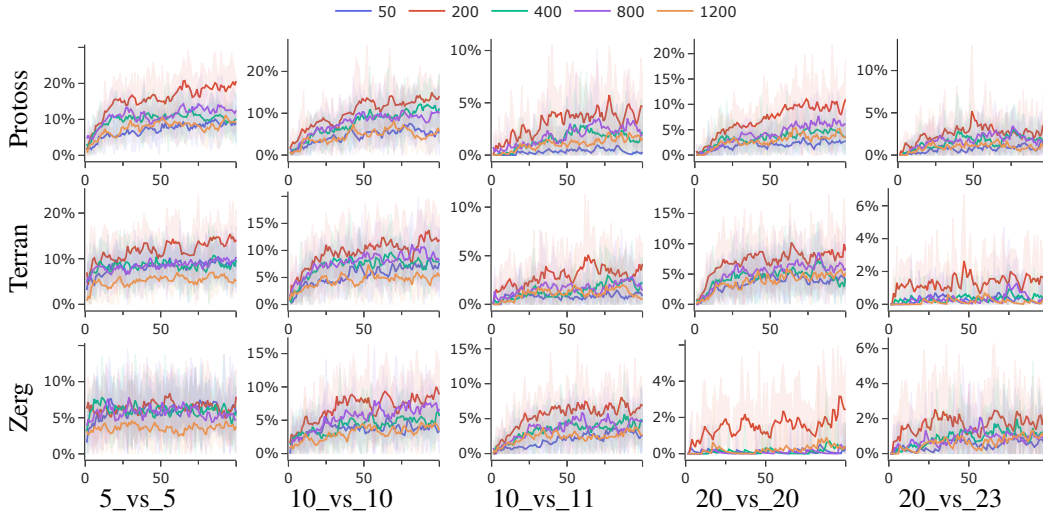

Figure 12: Ablation Study 1: Learning curves of average win rates for MisoDICE on SMACv2 tasks, illustrating the impact of varying the number of top-k expert trajectories ( $K_{\text{expert}}$ ) selected via LLM-based preference labeling. Each curve corresponds to a different  $K_{\text{expert}}$  value from the set  $\{50, 200, 400, 800, 1200\}$ .

## 892 C.5 Ablation Study 4: Performance with Rule-Based Preference Labeling

893 While a key contribution of our work involves leveraging Large Language Models (LLMs) for  
 894 inferring expert-like trajectories from unlabeled demonstrations, it is also important to understand  
 895 MisoDICE’s performance when relying on more traditional or simpler methods for generating initial  
 896 preference data. This ablation study evaluates MisoDICE using a rule-based approach for preference  
 897 labeling in its first phase.

898 In this rule-based setting, preference labels for pairs of trajectories  $(\sigma_1, \sigma_2)$  are generated based on a  
 899 predefined heuristic, typically by assuming that the cumulative return for each trajectory is known or

Table 8: Ablation Study 2: Final average returns for MisoDICE on SMACv1 and SMACv2 tasks, evaluating the impact of different values for the suboptimal data influence hyperparameter ( $\alpha$ ) when using LLM-based preference labeling. The hyperparameter  $\alpha$  controls the influence of the union dataset in the learning objective.

|            | $\alpha = 0.00$ | $\alpha = 0.05$ | $\alpha = 0.10$ | $\alpha = 0.50$ | $\alpha = 1.00$ | $\alpha = 10.0$ |            |
|------------|-----------------|-----------------|-----------------|-----------------|-----------------|-----------------|------------|
| 2c_vs_64zg | 15.9 ± 1.0      | 16.4 ± 1.3      | 15.3 ± 1.1      | 14.9 ± 0.7      | 13.3 ± 0.9      | 10.9 ± 0.3      |            |
| 5m_vs_6m   | 6.6 ± 1.4       | 7.3 ± 0.1       | 6.3 ± 1.0       | 6.5 ± 0.5       | 6.9 ± 0.2       | 6.7 ± 0.1       |            |
| 6h_vs_8z   | 8.3 ± 0.2       | 8.7 ± 0.2       | 8.0 ± 0.2       | 8.0 ± 0.2       | 7.7 ± 0.2       | 7.6 ± 0.1       |            |
| corridor   | 5.3 ± 0.6       | 5.8 ± 0.8       | 5.3 ± 0.6       | 5.1 ± 0.2       | 3.8 ± 0.9       | 1.7 ± 0.1       |            |
| Protoss    | 5_vs_5          | 12.4 ± 0.4      | 12.4 ± 0.5      | 11.7 ± 0.4      | 11.8 ± 0.4      | 11.9 ± 0.3      | 11.7 ± 0.4 |
|            | 10_vs_10        | 12.1 ± 0.2      | 12.9 ± 0.2      | 12.2 ± 0.6      | 12.1 ± 0.3      | 11.6 ± 0.5      | 12.1 ± 0.4 |
|            | 10_vs_11        | 10.7 ± 0.5      | 10.7 ± 0.4      | 10.1 ± 0.5      | 10.1 ± 0.4      | 9.8 ± 0.3       | 9.9 ± 0.1  |
|            | 20_vs_20        | 12.4 ± 0.2      | 13.5 ± 0.5      | 12.3 ± 0.4      | 12.2 ± 0.5      | 11.8 ± 0.2      | 12.1 ± 0.4 |
|            | 20_vs_23        | 10.4 ± 0.4      | 10.6 ± 0.2      | 10.1 ± 0.3      | 10.1 ± 0.2      | 10.0 ± 0.2      | 9.6 ± 0.5  |
|            | Terran          | 5_vs_5          | 8.8 ± 0.7       | 9.1 ± 0.3       | 8.4 ± 0.8       | 8.5 ± 0.2       | 7.9 ± 0.4  |
| 10_vs_10   |                 | 8.9 ± 0.8       | 9.1 ± 1.3       | 8.5 ± 0.6       | 8.6 ± 0.9       | 7.8 ± 0.7       | 8.1 ± 0.7  |
| 10_vs_11   |                 | 5.9 ± 0.4       | 6.4 ± 0.5       | 5.8 ± 0.3       | 5.9 ± 0.4       | 5.7 ± 0.5       | 5.8 ± 0.6  |
| 20_vs_20   |                 | 9.0 ± 0.6       | 9.2 ± 0.6       | 8.5 ± 0.7       | 8.4 ± 0.6       | 8.2 ± 0.6       | 8.4 ± 0.7  |
| 20_vs_23   |                 | 5.6 ± 0.2       | 5.6 ± 0.4       | 5.3 ± 0.3       | 5.1 ± 0.3       | 5.1 ± 0.3       | 5.1 ± 0.1  |
| Zerg       |                 | 5_vs_5          | 7.3 ± 0.5       | 7.5 ± 0.1       | 7.2 ± 0.6       | 6.8 ± 0.2       | 6.4 ± 0.3  |
|            | 10_vs_10        | 9.7 ± 0.4       | 10.2 ± 0.6      | 9.2 ± 0.3       | 9.2 ± 0.4       | 8.7 ± 0.2       | 8.9 ± 0.4  |
|            | 10_vs_11        | 9.0 ± 0.5       | 9.4 ± 0.3       | 8.5 ± 0.2       | 8.8 ± 0.3       | 8.7 ± 0.4       | 8.3 ± 0.5  |
|            | 20_vs_20        | 9.0 ± 0.4       | 10.2 ± 0.6      | 9.0 ± 0.3       | 9.1 ± 0.7       | 8.8 ± 0.4       | 8.9 ± 0.4  |
|            | 20_vs_23        | 8.9 ± 0.2       | 9.5 ± 0.2       | 8.8 ± 0.4       | 8.9 ± 0.3       | 8.5 ± 0.4       | 8.6 ± 0.4  |

Table 9: Ablation Study 2: Final average win rates for MisoDICE on SMACv1 and SMACv2 tasks, evaluating the impact of different values for the suboptimal data influence hyperparameter ( $\alpha$ ) when using LLM-based preference labeling. The hyperparameter  $\alpha$  controls the influence of the union dataset in the learning objective.

|            | $\alpha = 0.00$ | $\alpha = 0.05$ | $\alpha = 0.10$ | $\alpha = 0.50$ | $\alpha = 1.00$ | $\alpha = 10.0$ |                |
|------------|-----------------|-----------------|-----------------|-----------------|-----------------|-----------------|----------------|
| 2c_vs_64zg | 11.0 $\pm$ 5.8  | 13.0 $\pm$ 9.0  | 10.0 $\pm$ 5.0  | 9.3 $\pm$ 2.9   | 7.1 $\pm$ 4.1   | 1.7 $\pm$ 0.9   |                |
| 5m_vs_6m   | 1.1 $\pm$ 1.0   | 1.2 $\pm$ 0.5   | 0.6 $\pm$ 0.4   | 0.7 $\pm$ 0.4   | 0.9 $\pm$ 0.7   | 0.7 $\pm$ 0.5   |                |
| 6h_vs_8z   | 1.0 $\pm$ 0.8   | 1.1 $\pm$ 0.8   | 1.1 $\pm$ 0.8   | 0.8 $\pm$ 0.5   | 0.4 $\pm$ 0.3   | 1.0 $\pm$ 0.5   |                |
| corridor   | 0.4 $\pm$ 0.2   | 1.4 $\pm$ 0.6   | 1.2 $\pm$ 0.5   | 0.5 $\pm$ 0.4   | 1.4 $\pm$ 0.7   | 0.9 $\pm$ 0.4   |                |
| Protoss    | 5_vs_5          | 12.1 $\pm$ 1.6  | 20.7 $\pm$ 0.9  | 14.4 $\pm$ 2.1  | 12.9 $\pm$ 2.0  | 14.1 $\pm$ 2.2  | 17.2 $\pm$ 2.5 |
|            | 10_vs_10        | 8.4 $\pm$ 3.3   | 14.1 $\pm$ 2.1  | 9.9 $\pm$ 2.2   | 9.5 $\pm$ 2.6   | 9.0 $\pm$ 1.7   | 11.1 $\pm$ 2.3 |
|            | 10_vs_11        | 3.3 $\pm$ 1.1   | 4.7 $\pm$ 0.3   | 4.3 $\pm$ 0.4   | 3.5 $\pm$ 1.3   | 3.5 $\pm$ 1.1   | 4.3 $\pm$ 1.2  |
|            | 20_vs_20        | 5.4 $\pm$ 0.4   | 11.0 $\pm$ 3.2  | 5.5 $\pm$ 1.1   | 6.4 $\pm$ 1.0   | 6.4 $\pm$ 0.7   | 7.8 $\pm$ 2.4  |
|            | 20_vs_23        | 4.3 $\pm$ 0.6   | 3.8 $\pm$ 2.0   | 2.3 $\pm$ 1.4   | 3.5 $\pm$ 1.6   | 3.3 $\pm$ 0.8   | 2.5 $\pm$ 1.3  |
| Terran     | 5_vs_5          | 12.4 $\pm$ 2.9  | 14.2 $\pm$ 3.1  | 11.2 $\pm$ 0.8  | 12.1 $\pm$ 1.6  | 12.0 $\pm$ 3.2  | 12.2 $\pm$ 3.2 |
|            | 10_vs_10        | 9.3 $\pm$ 1.2   | 12.0 $\pm$ 1.7  | 8.6 $\pm$ 1.9   | 9.2 $\pm$ 3.6   | 8.8 $\pm$ 1.9   | 9.3 $\pm$ 3.2  |
|            | 10_vs_11        | 2.3 $\pm$ 0.4   | 4.2 $\pm$ 1.6   | 3.5 $\pm$ 1.2   | 2.3 $\pm$ 0.7   | 2.2 $\pm$ 0.8   | 3.6 $\pm$ 1.5  |
|            | 20_vs_20        | 4.8 $\pm$ 1.6   | 8.8 $\pm$ 1.5   | 4.9 $\pm$ 1.5   | 5.9 $\pm$ 2.5   | 4.9 $\pm$ 1.9   | 9.3 $\pm$ 2.1  |
|            | 20_vs_23        | 1.5 $\pm$ 0.7   | 1.8 $\pm$ 1.4   | 1.2 $\pm$ 0.7   | 1.8 $\pm$ 0.7   | 1.2 $\pm$ 0.9   | 1.7 $\pm$ 1.0  |
| Zerg       | 5_vs_5          | 7.1 $\pm$ 1.6   | 7.9 $\pm$ 1.0   | 7.4 $\pm$ 1.0   | 5.9 $\pm$ 0.7   | 6.4 $\pm$ 2.7   | 7.5 $\pm$ 2.1  |
|            | 10_vs_10        | 6.7 $\pm$ 1.2   | 8.9 $\pm$ 2.1   | 7.2 $\pm$ 2.6   | 7.0 $\pm$ 0.8   | 7.1 $\pm$ 0.9   | 6.9 $\pm$ 1.0  |
|            | 10_vs_11        | 5.0 $\pm$ 1.4   | 6.8 $\pm$ 1.1   | 5.0 $\pm$ 1.5   | 4.1 $\pm$ 1.9   | 5.0 $\pm$ 1.2   | 4.5 $\pm$ 1.4  |
|            | 20_vs_20        | 1.3 $\pm$ 0.5   | 2.4 $\pm$ 0.6   | 1.2 $\pm$ 0.4   | 1.7 $\pm$ 2.1   | 1.6 $\pm$ 0.3   | 2.6 $\pm$ 0.6  |
|            | 20_vs_23        | 1.4 $\pm$ 0.5   | 2.7 $\pm$ 0.4   | 1.0 $\pm$ 0.4   | 2.5 $\pm$ 0.7   | 2.7 $\pm$ 1.7   | 2.1 $\pm$ 0.7  |



can be accurately estimated, with the trajectory yielding a higher return being labeled as preferred. Although straightforward, such rule-based methods can have limitations in complex cooperative multi-agent settings, as individual rewards or simple cumulative returns may not always accurately reflect true team-level cooperativeness or overall strategic success.

The primary motivation for this study is twofold: first, to assess the inherent capability of the MisoDICE algorithm (Phase 2) to learn effective policies even when the expert dataset  $\mathcal{D}_{rule}^E$  is identified using these simpler, potentially less nuanced, preference signals. Second, it provides a crucial benchmark to quantify the additional benefits and performance improvements gained by employing the more sophisticated LLM-based preference labeling approach presented as our main method.

We present the performance of MisoDICE and relevant baselines in terms of returns and win rates when using rule-based preference data, as detailed in Table 11 and Table 12. These results will illustrate MisoDICE’s adaptability and provide a clearer understanding of the impact of different preference generation techniques on final policy quality.

## C.6 Ablation Study 5: Performance with Ground Truth Data Labels

In this ablation study, we aim to establish an upper-bound performance benchmark for our MisoDICE framework by utilizing ground truth labels for the initial data segmentation in Phase 1. This means that instead of relying on LLM-generated preferences or rule-based heuristics to identify expert trajectories, we directly use the original quality labels (i.e., ‘expert’ and ‘poor’) available from the O-MAPL datasets from which our mixed-quality dataset  $\mathcal{D}^U$  was constructed.

Specifically, the expert dataset  $\mathcal{D}^E$  is formed by selecting trajectories that were originally labeled as ‘expert’ in the O-MAPL dataset, and the suboptimal dataset  $\mathcal{D}^{Mix}$  comprises those originally labeled as ‘poor’. This process effectively bypasses the entirety of our proposed multi-step labeling pipeline (Section 4, Algorithm 2), including LLM prompting, preference learning with O-MAPL for reward recovery, and subsequent trajectory ranking. By providing MisoDICE’s Phase 2 with this perfectly partitioned data, we can evaluate the core imitation learning algorithm’s effectiveness under idealized conditions.

Table 10: Ablation Study 3: Comparison of MisoDICE performance (final average returns and win rates) on SMACv1 and SMACv2 tasks when using GPT-4o versus GPT-4o-mini for LLM-based preference labeling in the initial data annotation phase (Phase 1).

|         |            | Returns - MisoDICE |            | Winrates - MisoDICE |            |
|---------|------------|--------------------|------------|---------------------|------------|
|         |            | (gpt-4o-mini)      | (gpt-4o)   | (gpt-4o-mini)       | (gpt-4o)   |
|         | 2c_vs_64zg | 12.2 ± 0.6         | 16.4 ± 1.3 | 2.1 ± 1.1           | 13.0 ± 9.0 |
|         | 5m_vs_6m   | 6.7 ± 0.9          | 7.3 ± 0.1  | 1.2 ± 0.4           | 1.2 ± 0.5  |
|         | 6h_vs_8z   | 8.1 ± 0.2          | 8.7 ± 0.2  | 0.1 ± 0.1           | 1.1 ± 0.8  |
|         | corridor   | 3.8 ± 0.8          | 5.8 ± 0.8  | 0.6 ± 0.7           | 1.4 ± 0.6  |
| Protoss | 5_vs_5     | 12.0 ± 0.3         | 12.4 ± 0.5 | 12.6 ± 2.6          | 20.7 ± 0.9 |
|         | 10_vs_10   | 12.0 ± 0.5         | 12.9 ± 0.2 | 10.5 ± 3.5          | 14.1 ± 2.1 |
|         | 10_vs_11   | 10.6 ± 0.3         | 10.7 ± 0.4 | 4.0 ± 1.8           | 4.7 ± 0.3  |
|         | 20_vs_20   | 12.4 ± 0.5         | 13.5 ± 0.5 | 6.0 ± 0.9           | 11.0 ± 3.2 |
|         | 20_vs_23   | 10.3 ± 0.1         | 10.6 ± 0.2 | 2.3 ± 1.4           | 3.8 ± 2.0  |
| Terran  | 5_vs_5     | 8.1 ± 0.5          | 9.1 ± 0.3  | 10.0 ± 1.4          | 14.2 ± 3.1 |
|         | 10_vs_10   | 8.6 ± 0.9          | 9.1 ± 1.3  | 9.2 ± 2.1           | 12.0 ± 1.7 |
|         | 10_vs_11   | 6.0 ± 0.3          | 6.4 ± 0.5  | 2.2 ± 1.1           | 4.2 ± 1.6  |
|         | 20_vs_20   | 8.1 ± 0.5          | 9.2 ± 0.6  | 6.1 ± 2.1           | 8.8 ± 1.5  |
|         | 20_vs_23   | 5.3 ± 0.3          | 5.6 ± 0.4  | 0.9 ± 0.6           | 1.8 ± 1.4  |
| Zerg    | 5_vs_5     | 7.0 ± 0.4          | 7.5 ± 0.1  | 5.3 ± 1.1           | 7.9 ± 1.0  |
|         | 10_vs_10   | 9.6 ± 0.2          | 10.2 ± 0.6 | 7.1 ± 0.9           | 8.9 ± 2.1  |
|         | 10_vs_11   | 9.2 ± 0.6          | 9.4 ± 0.3  | 5.0 ± 0.9           | 6.8 ± 1.1  |
|         | 20_vs_20   | 8.9 ± 0.4          | 10.2 ± 0.6 | 0.8 ± 0.8           | 2.4 ± 0.6  |
|         | 20_vs_23   | 9.0 ± 0.2          | 9.5 ± 0.2  | 1.7 ± 0.8           | 2.7 ± 0.4  |

927 The primary motivation for this study is to isolate and assess the performance of the MisoDICE  
928 multi-agent IL algorithm (Phase 2) when the complexities and potential inaccuracies of the trajectory  
929 labeling stage are removed. The results obtained from this setup will serve as a crucial reference point,  
930 allowing us to quantify how closely the performance achieved with our LLM-based or rule-based  
931 labeling approaches (as explored in previous ablation studies and main experiments) approximates this  
932 scenario with ground truth data separation. This will provide insights into the efficacy of the labeling

Table 11: Ablation Study 4: Final average returns for MisoDICE and baseline methods on MaMujoco, SMACv1, and SMACv2 tasks. For MisoDICE, the expert dataset ( $\mathcal{D}_{\text{rule}}^E$ ) was identified using a rule-based preference labeling approach in Phase 1.

|            |                | BC                |                   |                   | INDD              | VDN               | MisoDICE (ours)  |
|------------|----------------|-------------------|-------------------|-------------------|-------------------|-------------------|------------------|
|            |                | ( $\beta = 0.0$ ) | ( $\beta = 0.5$ ) | ( $\beta = 1.0$ ) |                   |                   |                  |
| Hopper-v2  | Hopper-v2      | 123.0 $\pm$ 23.1  | 154.1 $\pm$ 44.6  | 158.1 $\pm$ 46.4  | 135.4 $\pm$ 32.8  | 171.4 $\pm$ 19.2  | 206.5 $\pm$ 22.5 |
|            | Ant-v2         | 1026.5 $\pm$ 77.7 | 1631.1 $\pm$ 51.8 | 1910.8 $\pm$ 70.2 | 1826.4 $\pm$ 16.6 | 1869.7 $\pm$ 9.1  | 2025.8 $\pm$ 3.2 |
|            | HalfCheetah-v2 | -201.5 $\pm$ 7.9  | -206.5 $\pm$ 6.0  | -73.4 $\pm$ 34.5  | -277.9 $\pm$ 5.7  | -243.9 $\pm$ 14.8 | -72.1 $\pm$ 31.8 |
| 2c_vs_64zg | 2c_vs_64zg     | 8.4 $\pm$ 0.2     | 9.3 $\pm$ 0.3     | 9.7 $\pm$ 0.7     | 11.8 $\pm$ 0.4    | 13.2 $\pm$ 1.5    | 15.0 $\pm$ 1.4   |
|            | 5m_vs_6m       | 4.9 $\pm$ 1.3     | 6.3 $\pm$ 0.6     | 5.9 $\pm$ 0.4     | 6.6 $\pm$ 0.2     | 6.7 $\pm$ 0.1     | 7.2 $\pm$ 0.1    |
|            | 6h_vs_8z       | 7.0 $\pm$ 0.1     | 7.4 $\pm$ 0.1     | 7.1 $\pm$ 0.2     | 7.4 $\pm$ 0.3     | 7.8 $\pm$ 0.1     | 8.5 $\pm$ 0.1    |
|            | corridor       | 1.4 $\pm$ 0.1     | 1.5 $\pm$ 0.2     | 3.0 $\pm$ 0.6     | 3.0 $\pm$ 0.6     | 1.7 $\pm$ 0.0     | 4.7 $\pm$ 0.6    |
|            |                |                   |                   |                   |                   |                   |                  |
| Protoss    | 5_vs_5         | 9.8 $\pm$ 0.4     | 10.4 $\pm$ 0.4    | 10.2 $\pm$ 0.6    | 10.4 $\pm$ 0.5    | 11.5 $\pm$ 0.6    | 12.2 $\pm$ 0.7   |
|            | 10_vs_10       | 9.4 $\pm$ 0.2     | 11.7 $\pm$ 0.8    | 10.1 $\pm$ 0.3    | 10.9 $\pm$ 0.5    | 11.8 $\pm$ 0.6    | 12.6 $\pm$ 0.6   |
|            | 10_vs_11       | 7.7 $\pm$ 0.4     | 9.4 $\pm$ 0.3     | 8.4 $\pm$ 0.5     | 9.1 $\pm$ 0.4     | 9.5 $\pm$ 0.4     | 10.6 $\pm$ 0.4   |
|            | 20_vs_20       | 10.5 $\pm$ 0.3    | 10.3 $\pm$ 0.4    | 9.9 $\pm$ 0.6     | 11.3 $\pm$ 0.3    | 11.4 $\pm$ 0.3    | 13.1 $\pm$ 0.4   |
|            | 20_vs_23       | 7.9 $\pm$ 0.3     | 8.3 $\pm$ 0.3     | 8.3 $\pm$ 0.2     | 9.4 $\pm$ 0.2     | 9.5 $\pm$ 0.4     | 10.4 $\pm$ 0.4   |
| Terran     | 5_vs_5         | 6.5 $\pm$ 0.5     | 7.2 $\pm$ 0.7     | 6.9 $\pm$ 0.6     | 7.6 $\pm$ 0.4     | 8.0 $\pm$ 0.7     | 8.8 $\pm$ 0.5    |
|            | 10_vs_10       | 6.1 $\pm$ 0.5     | 7.1 $\pm$ 0.7     | 6.6 $\pm$ 0.6     | 7.3 $\pm$ 0.7     | 7.6 $\pm$ 0.3     | 8.6 $\pm$ 0.3    |
|            | 10_vs_11       | 4.6 $\pm$ 0.2     | 5.4 $\pm$ 0.6     | 5.0 $\pm$ 0.2     | 5.5 $\pm$ 0.1     | 5.7 $\pm$ 0.2     | 6.2 $\pm$ 0.5    |
|            | 20_vs_20       | 6.5 $\pm$ 0.5     | 7.3 $\pm$ 0.5     | 6.7 $\pm$ 0.5     | 7.8 $\pm$ 0.6     | 8.4 $\pm$ 0.5     | 9.1 $\pm$ 0.4    |
|            | 20_vs_23       | 4.0 $\pm$ 0.3     | 5.0 $\pm$ 0.2     | 4.2 $\pm$ 0.3     | 5.1 $\pm$ 0.5     | 5.0 $\pm$ 0.1     | 5.5 $\pm$ 0.4    |
| Zerg       | 5_vs_5         | 5.5 $\pm$ 0.3     | 6.5 $\pm$ 0.3     | 5.6 $\pm$ 0.2     | 6.2 $\pm$ 0.5     | 6.6 $\pm$ 0.3     | 7.4 $\pm$ 0.5    |
|            | 10_vs_10       | 7.1 $\pm$ 0.2     | 8.2 $\pm$ 0.5     | 7.2 $\pm$ 0.5     | 8.0 $\pm$ 0.3     | 8.5 $\pm$ 0.8     | 10.0 $\pm$ 0.2   |
|            | 10_vs_11       | 6.5 $\pm$ 0.4     | 8.2 $\pm$ 0.3     | 6.8 $\pm$ 0.1     | 7.9 $\pm$ 0.3     | 8.4 $\pm$ 0.2     | 9.1 $\pm$ 0.6    |
|            | 20_vs_20       | 7.3 $\pm$ 0.2     | 9.0 $\pm$ 0.3     | 7.6 $\pm$ 0.2     | 8.1 $\pm$ 0.7     | 8.6 $\pm$ 0.4     | 10.0 $\pm$ 0.6   |
|            | 20_vs_23       | 7.0 $\pm$ 0.2     | 7.9 $\pm$ 0.3     | 6.9 $\pm$ 0.1     | 8.1 $\pm$ 0.2     | 8.8 $\pm$ 0.3     | 9.5 $\pm$ 0.4    |

Table 12: Ablation Study 4: Final average win rates for MisoDICE and baseline methods on SMACv1 and SMACv2 tasks. For MisoDICE, the expert dataset ( $\mathcal{D}_{\text{rule}}^E$ ) was identified using a rule-based preference labeling approach in Phase 1.

|            |            | BC                |                   |                   | INDD           | VDN            | MisoDICE (ours) |
|------------|------------|-------------------|-------------------|-------------------|----------------|----------------|-----------------|
|            |            | ( $\beta = 0.0$ ) | ( $\beta = 0.5$ ) | ( $\beta = 1.0$ ) |                |                |                 |
| 2c_vs_64zg | 2c_vs_64zg | 0.1 $\pm$ 0.1     | 0.5 $\pm$ 0.3     | 1.0 $\pm$ 1.0     | 2.3 $\pm$ 0.1  | 7.1 $\pm$ 4.6  | 8.4 $\pm$ 5.9   |
|            | 5m_vs_6m   | 0.2 $\pm$ 0.4     | 0.7 $\pm$ 0.5     | 0.1 $\pm$ 0.1     | 0.1 $\pm$ 0.1  | 1.1 $\pm$ 0.8  | 1.3 $\pm$ 0.5   |
|            | 6h_vs_8z   | 0.2 $\pm$ 0.2     | 0.0 $\pm$ 0.0     | 0.2 $\pm$ 0.3     | 0.1 $\pm$ 0.1  | 1.0 $\pm$ 0.6  | 1.1 $\pm$ 0.8   |
|            | corridor   | 0.1 $\pm$ 0.1     | 0.6 $\pm$ 0.7     | 0.3 $\pm$ 0.4     | 0.1 $\pm$ 0.1  | 0.9 $\pm$ 0.6  | 1.4 $\pm$ 0.6   |
| Protoss    | 5_vs_5     | 15.8 $\pm$ 2.0    | 11.8 $\pm$ 1.7    | 13.7 $\pm$ 3.4    | 10.1 $\pm$ 1.6 | 14.3 $\pm$ 3.4 | 18.4 $\pm$ 1.3  |
|            | 10_vs_10   | 7.4 $\pm$ 3.3     | 9.4 $\pm$ 3.2     | 8.7 $\pm$ 2.9     | 7.2 $\pm$ 1.6  | 9.8 $\pm$ 2.1  | 12.2 $\pm$ 1.6  |
|            | 10_vs_11   | 1.4 $\pm$ 1.0     | 2.9 $\pm$ 1.5     | 1.7 $\pm$ 0.2     | 1.7 $\pm$ 0.2  | 2.8 $\pm$ 0.7  | 4.1 $\pm$ 1.1   |
|            | 20_vs_20   | 7.6 $\pm$ 1.7     | 2.9 $\pm$ 0.7     | 5.0 $\pm$ 2.4     | 3.9 $\pm$ 0.9  | 3.6 $\pm$ 1.4  | 8.7 $\pm$ 1.8   |
|            | 20_vs_23   | 1.4 $\pm$ 0.3     | 0.7 $\pm$ 0.5     | 1.7 $\pm$ 1.2     | 2.0 $\pm$ 0.6  | 1.6 $\pm$ 0.8  | 3.2 $\pm$ 0.8   |
| Terran     | 5_vs_5     | 8.7 $\pm$ 2.7     | 10.3 $\pm$ 2.6    | 10.4 $\pm$ 2.3    | 9.3 $\pm$ 1.6  | 8.8 $\pm$ 1.8  | 14.0 $\pm$ 3.5  |
|            | 10_vs_10   | 7.0 $\pm$ 2.0     | 7.8 $\pm$ 3.1     | 7.8 $\pm$ 2.8     | 6.6 $\pm$ 1.0  | 5.9 $\pm$ 2.3  | 11.3 $\pm$ 1.8  |
|            | 10_vs_11   | 1.5 $\pm$ 0.5     | 2.3 $\pm$ 0.8     | 2.0 $\pm$ 0.4     | 1.2 $\pm$ 0.8  | 2.2 $\pm$ 1.1  | 2.7 $\pm$ 1.2   |
|            | 20_vs_20   | 3.5 $\pm$ 1.7     | 5.6 $\pm$ 0.7     | 3.5 $\pm$ 2.8     | 4.3 $\pm$ 1.2  | 5.5 $\pm$ 1.9  | 7.6 $\pm$ 0.7   |
|            | 20_vs_23   | 0.5 $\pm$ 0.6     | 0.9 $\pm$ 0.3     | 0.5 $\pm$ 0.8     | 0.6 $\pm$ 0.6  | 0.9 $\pm$ 0.6  | 1.7 $\pm$ 1.3   |
| Zerg       | 5_vs_5     | 5.7 $\pm$ 0.4     | 5.2 $\pm$ 0.7     | 5.5 $\pm$ 1.4     | 5.4 $\pm$ 1.2  | 6.0 $\pm$ 2.1  | 6.6 $\pm$ 1.0   |
|            | 10_vs_10   | 3.7 $\pm$ 1.2     | 3.7 $\pm$ 0.9     | 3.7 $\pm$ 1.4     | 4.5 $\pm$ 1.1  | 4.3 $\pm$ 2.0  | 8.8 $\pm$ 1.7   |
|            | 10_vs_11   | 3.3 $\pm$ 1.0     | 4.1 $\pm$ 1.8     | 3.2 $\pm$ 1.4     | 3.6 $\pm$ 0.5  | 5.0 $\pm$ 1.4  | 6.7 $\pm$ 2.6   |
|            | 20_vs_20   | 0.3 $\pm$ 0.1     | 0.9 $\pm$ 0.5     | 0.9 $\pm$ 0.3     | 0.1 $\pm$ 0.1  | 1.1 $\pm$ 0.4  | 1.7 $\pm$ 0.4   |
|            | 20_vs_23   | 0.7 $\pm$ 0.4     | 0.6 $\pm$ 0.4     | 0.9 $\pm$ 0.4     | 0.6 $\pm$ 0.6  | 1.6 $\pm$ 0.4  | 2.4 $\pm$ 0.2   |



933 procedures themselves and the overall robustness of MisoDICE. We will present the performance of  
 934 MisoDICE in terms of returns and win rates in Table 13 and 14 under these ground truth conditions.

Table 13: Ablation Study 5: Final average returns on SMACv1 & SMACv2 tasks for MisoDICE and baselines, using ground truth data labels for expert/suboptimal trajectory separation.

|         |            | BC                |                   |                   | INDD           | VDN            | MisoDICE (ours) |
|---------|------------|-------------------|-------------------|-------------------|----------------|----------------|-----------------|
|         |            | ( $\beta = 0.0$ ) | ( $\beta = 0.5$ ) | ( $\beta = 1.0$ ) |                |                |                 |
|         | 2c_vs_64zg | 11.7 $\pm$ 0.4    | 11.3 $\pm$ 0.1    | 13.1 $\pm$ 0.8    | 15.1 $\pm$ 1.3 | 15.9 $\pm$ 2.0 | 16.1 $\pm$ 1.8  |
|         | 5m_vs_6m   | 6.1 $\pm$ 1.4     | 6.8 $\pm$ 1.4     | 7.2 $\pm$ 0.2     | 7.4 $\pm$ 0.2  | 7.4 $\pm$ 0.3  | 7.4 $\pm$ 0.1   |
|         | 6h_vs_8z   | 8.4 $\pm$ 0.1     | 8.4 $\pm$ 0.2     | 8.3 $\pm$ 0.3     | 8.2 $\pm$ 0.3  | 8.5 $\pm$ 0.1  | 8.9 $\pm$ 0.1   |
|         | corridor   | 2.1 $\pm$ 0.3     | 1.9 $\pm$ 0.3     | 5.7 $\pm$ 1.5     | 2.0 $\pm$ 0.2  | 5.8 $\pm$ 1.5  | 6.1 $\pm$ 1.6   |
| Protoss | 5_vs_5     | 13.3 $\pm$ 0.1    | 12.6 $\pm$ 2.8    | 12.0 $\pm$ 1.2    | 11.9 $\pm$ 1.9 | 13.3 $\pm$ 0.5 | 13.7 $\pm$ 1.2  |
|         | 10_vs_10   | 13.1 $\pm$ 0.9    | 12.5 $\pm$ 1.4    | 12.8 $\pm$ 0.9    | 12.3 $\pm$ 0.8 | 13.2 $\pm$ 0.5 | 14.0 $\pm$ 1.2  |
|         | 10_vs_11   | 10.8 $\pm$ 1.3    | 10.6 $\pm$ 0.9    | 10.9 $\pm$ 0.8    | 10.1 $\pm$ 1.1 | 11.4 $\pm$ 0.5 | 12.0 $\pm$ 1.3  |
|         | 20_vs_20   | 12.4 $\pm$ 1.4    | 12.2 $\pm$ 0.5    | 13.0 $\pm$ 0.4    | 12.7 $\pm$ 0.6 | 13.3 $\pm$ 1.4 | 13.9 $\pm$ 1.6  |
|         | 20_vs_23   | 10.1 $\pm$ 1.5    | 9.5 $\pm$ 0.5     | 10.2 $\pm$ 0.8    | 10.1 $\pm$ 0.9 | 10.4 $\pm$ 0.8 | 10.5 $\pm$ 1.1  |
| Terran  | 5_vs_5     | 8.9 $\pm$ 0.9     | 8.4 $\pm$ 1.0     | 8.7 $\pm$ 0.9     | 8.9 $\pm$ 1.8  | 9.4 $\pm$ 2.3  | 9.4 $\pm$ 1.5   |
|         | 10_vs_10   | 7.5 $\pm$ 1.0     | 8.2 $\pm$ 1.0     | 7.7 $\pm$ 1.2     | 7.9 $\pm$ 0.7  | 8.9 $\pm$ 1.3  | 9.0 $\pm$ 0.6   |
|         | 10_vs_11   | 6.3 $\pm$ 0.4     | 5.9 $\pm$ 1.4     | 5.8 $\pm$ 0.4     | 5.9 $\pm$ 0.7  | 7.1 $\pm$ 1.2  | 7.3 $\pm$ 1.0   |
|         | 20_vs_20   | 8.6 $\pm$ 1.2     | 8.3 $\pm$ 0.8     | 7.9 $\pm$ 0.2     | 8.3 $\pm$ 1.0  | 8.7 $\pm$ 1.0  | 9.3 $\pm$ 1.2   |
|         | 20_vs_23   | 5.1 $\pm$ 0.2     | 5.5 $\pm$ 0.5     | 5.4 $\pm$ 0.3     | 4.8 $\pm$ 0.4  | 5.6 $\pm$ 0.5  | 5.9 $\pm$ 0.7   |
| Zerg    | 5_vs_5     | 7.8 $\pm$ 1.2     | 7.0 $\pm$ 0.9     | 7.1 $\pm$ 1.4     | 6.8 $\pm$ 0.3  | 7.8 $\pm$ 0.8  | 8.0 $\pm$ 0.6   |
|         | 10_vs_10   | 8.7 $\pm$ 1.2     | 8.2 $\pm$ 0.5     | 9.2 $\pm$ 0.8     | 9.6 $\pm$ 1.2  | 9.6 $\pm$ 1.7  | 9.9 $\pm$ 0.5   |
|         | 10_vs_11   | 9.6 $\pm$ 0.4     | 9.3 $\pm$ 1.5     | 8.8 $\pm$ 1.2     | 9.3 $\pm$ 1.0  | 9.8 $\pm$ 0.9  | 9.9 $\pm$ 0.9   |
|         | 20_vs_20   | 9.2 $\pm$ 0.8     | 9.3 $\pm$ 0.6     | 9.4 $\pm$ 1.1     | 9.2 $\pm$ 0.7  | 9.5 $\pm$ 0.8  | 11.1 $\pm$ 1.3  |
|         | 20_vs_23   | 9.2 $\pm$ 1.1     | 8.9 $\pm$ 0.5     | 8.2 $\pm$ 0.6     | 9.3 $\pm$ 1.0  | 9.5 $\pm$ 0.3  | 9.5 $\pm$ 0.1   |

Table 14: Ablation Study 5: Final average win rates on SMACv1 & SMACv2 tasks for MisoDICE and baselines, using ground truth data labels for expert/suboptimal trajectory separation.

|         |            | BC                |                   |                   | INDD           | VDN            | MisoDICE (ours) |
|---------|------------|-------------------|-------------------|-------------------|----------------|----------------|-----------------|
|         |            | ( $\beta = 0.0$ ) | ( $\beta = 0.5$ ) | ( $\beta = 1.0$ ) |                |                |                 |
|         | 2c_vs_64zg | 1.6 $\pm$ 1.6     | 0.0 $\pm$ 0.0     | 5.5 $\pm$ 2.6     | 9.4 $\pm$ 2.2  | 10.2 $\pm$ 7.1 | 11.7 $\pm$ 8.1  |
|         | 5m_vs_6m   | 0.8 $\pm$ 1.4     | 1.6 $\pm$ 1.6     | 0.8 $\pm$ 1.4     | 0.8 $\pm$ 1.4  | 1.6 $\pm$ 1.6  | 1.6 $\pm$ 1.6   |
|         | 6h_vs_8z   | 0.0 $\pm$ 0.0     | 0.8 $\pm$ 1.4     | 0.0 $\pm$ 0.0     | 0.0 $\pm$ 0.0  | 1.6 $\pm$ 1.6  | 2.3 $\pm$ 2.6   |
|         | corridor   | 0.8 $\pm$ 1.4     | 0.8 $\pm$ 1.4     | 0.8 $\pm$ 1.4     | 0.8 $\pm$ 1.4  | 1.6 $\pm$ 2.7  | 2.3 $\pm$ 2.6   |
| Protoss | 5_vs_5     | 13.3 $\pm$ 3.4    | 17.2 $\pm$ 8.4    | 20.3 $\pm$ 4.7    | 17.2 $\pm$ 3.5 | 20.3 $\pm$ 6.8 | 21.1 $\pm$ 11.6 |
|         | 10_vs_10   | 10.2 $\pm$ 3.4    | 10.2 $\pm$ 3.4    | 8.6 $\pm$ 6.0     | 6.2 $\pm$ 2.2  | 10.2 $\pm$ 2.6 | 15.6 $\pm$ 4.4  |
|         | 10_vs_11   | 1.6 $\pm$ 1.6     | 3.9 $\pm$ 1.4     | 3.1 $\pm$ 3.1     | 4.7 $\pm$ 3.5  | 4.7 $\pm$ 1.6  | 6.2 $\pm$ 2.2   |
|         | 20_vs_20   | 8.6 $\pm$ 6.4     | 2.3 $\pm$ 2.6     | 9.4 $\pm$ 2.2     | 7.0 $\pm$ 7.8  | 9.4 $\pm$ 2.2  | 10.9 $\pm$ 5.2  |
|         | 20_vs_23   | 2.3 $\pm$ 2.6     | 1.6 $\pm$ 1.6     | 1.6 $\pm$ 1.6     | 2.3 $\pm$ 1.4  | 3.1 $\pm$ 3.8  | 3.9 $\pm$ 5.1   |
| Terran  | 5_vs_5     | 10.9 $\pm$ 3.5    | 7.0 $\pm$ 4.1     | 9.4 $\pm$ 3.8     | 11.7 $\pm$ 4.1 | 16.4 $\pm$ 7.5 | 17.2 $\pm$ 8.4  |
|         | 10_vs_10   | 8.6 $\pm$ 2.6     | 7.0 $\pm$ 4.1     | 7.8 $\pm$ 3.5     | 5.5 $\pm$ 2.6  | 9.4 $\pm$ 3.8  | 10.9 $\pm$ 3.5  |
|         | 10_vs_11   | 1.6 $\pm$ 1.6     | 1.6 $\pm$ 2.7     | 2.3 $\pm$ 1.4     | 1.6 $\pm$ 2.7  | 4.7 $\pm$ 3.5  | 5.5 $\pm$ 2.6   |
|         | 20_vs_20   | 7.0 $\pm$ 2.6     | 6.2 $\pm$ 2.2     | 4.7 $\pm$ 3.5     | 4.7 $\pm$ 1.6  | 8.6 $\pm$ 5.1  | 9.4 $\pm$ 2.2   |
|         | 20_vs_23   | 0.8 $\pm$ 1.4     | 0.0 $\pm$ 0.0     | 1.6 $\pm$ 2.7     | 0.8 $\pm$ 1.4  | 1.6 $\pm$ 1.6  | 2.3 $\pm$ 1.4   |
| Zerg    | 5_vs_5     | 6.2 $\pm$ 2.2     | 5.5 $\pm$ 1.4     | 3.9 $\pm$ 2.6     | 6.2 $\pm$ 3.8  | 7.0 $\pm$ 4.6  | 7.8 $\pm$ 4.7   |
|         | 10_vs_10   | 7.8 $\pm$ 2.7     | 5.5 $\pm$ 3.4     | 5.5 $\pm$ 4.6     | 3.1 $\pm$ 2.2  | 8.6 $\pm$ 6.8  | 8.6 $\pm$ 8.1   |
|         | 10_vs_11   | 3.9 $\pm$ 1.4     | 4.7 $\pm$ 3.5     | 0.8 $\pm$ 1.4     | 3.9 $\pm$ 2.6  | 8.6 $\pm$ 3.4  | 8.6 $\pm$ 4.6   |
|         | 20_vs_20   | 1.6 $\pm$ 2.7     | 1.6 $\pm$ 1.6     | 0.8 $\pm$ 1.4     | 0.0 $\pm$ 0.0  | 3.9 $\pm$ 2.6  | 2.3 $\pm$ 2.6   |
|         | 20_vs_23   | 0.8 $\pm$ 1.4     | 1.6 $\pm$ 1.6     | 1.6 $\pm$ 1.6     | 0.0 $\pm$ 0.0  | 1.6 $\pm$ 2.7  | 1.6 $\pm$ 2.7   |

## NeurIPS Paper Checklist

The checklist is designed to encourage best practices for responsible machine learning research, addressing issues of reproducibility, transparency, research ethics, and societal impact. Do not remove the checklist: **The papers not including the checklist will be desk rejected.** The checklist should follow the references and follow the (optional) supplemental material. The checklist does NOT count towards the page limit.

Please read the checklist guidelines carefully for information on how to answer these questions. For each question in the checklist:

- You should answer [Yes], [No], or [NA].
- [NA] means either that the question is Not Applicable for that particular paper or the relevant information is Not Available.
- Please provide a short (1–2 sentence) justification right after your answer (even for NA).

**The checklist answers are an integral part of your paper submission.** They are visible to the reviewers, area chairs, senior area chairs, and ethics reviewers. You will be asked to also include it (after eventual revisions) with the final version of your paper, and its final version will be published with the paper.

The reviewers of your paper will be asked to use the checklist as one of the factors in their evaluation. While "[Yes]" is generally preferable to "[No]", it is perfectly acceptable to answer "[No]" provided a proper justification is given (e.g., "error bars are not reported because it would be too computationally expensive" or "we were unable to find the license for the dataset we used"). In general, answering "[No]" or "[NA]" is not grounds for rejection. While the questions are phrased in a binary way, we acknowledge that the true answer is often more nuanced, so please just use your best judgment and write a justification to elaborate. All supporting evidence can appear either in the main paper or the supplemental material, provided in appendix. If you answer [Yes] to a question, in the justification please point to the section(s) where related material for the question can be found.

IMPORTANT, please:

- **Delete this instruction block, but keep the section heading “NeurIPS Paper Checklist”,**
- **Keep the checklist subsection headings, questions/answers and guidelines below.**
- **Do not modify the questions and only use the provided macros for your answers.**

### 1. Claims

Question: Do the main claims made in the abstract and introduction accurately reflect the paper’s contributions and scope?

Answer: [Yes]

Justification: *Our abstract includes our main claims reflecting our main contributions and finding.*

Guidelines:

- The answer NA means that the abstract and introduction do not include the claims made in the paper.
- The abstract and/or introduction should clearly state the claims made, including the contributions made in the paper and important assumptions and limitations. A No or NA answer to this question will not be perceived well by the reviewers.
- The claims made should match theoretical and experimental results, and reflect how much the results can be expected to generalize to other settings.
- It is fine to include aspirational goals as motivation as long as it is clear that these goals are not attained by the paper.

### 2. Limitations

Question: Does the paper discuss the limitations of the work performed by the authors?

Answer: [Yes]

Justification: *We discuss limitations of the work in the conclusion section.*

Guidelines:

- The answer NA means that the paper has no limitation while the answer No means that the paper has limitations, but those are not discussed in the paper.
- The authors are encouraged to create a separate "Limitations" section in their paper.
- The paper should point out any strong assumptions and how robust the results are to violations of these assumptions (e.g., independence assumptions, noiseless settings, model well-specification, asymptotic approximations only holding locally). The authors should reflect on how these assumptions might be violated in practice and what the implications would be.
- The authors should reflect on the scope of the claims made, e.g., if the approach was only tested on a few datasets or with a few runs. In general, empirical results often depend on implicit assumptions, which should be articulated.
- The authors should reflect on the factors that influence the performance of the approach. For example, a facial recognition algorithm may perform poorly when image resolution is low or images are taken in low lighting. Or a speech-to-text system might not be used reliably to provide closed captions for online lectures because it fails to handle technical jargon.
- The authors should discuss the computational efficiency of the proposed algorithms and how they scale with dataset size.
- If applicable, the authors should discuss possible limitations of their approach to address problems of privacy and fairness.
- While the authors might fear that complete honesty about limitations might be used by reviewers as grounds for rejection, a worse outcome might be that reviewers discover limitations that aren't acknowledged in the paper. The authors should use their best judgment and recognize that individual actions in favor of transparency play an important role in developing norms that preserve the integrity of the community. Reviewers will be specifically instructed to not penalize honesty concerning limitations.

### 3. Theory assumptions and proofs

Question: For each theoretical result, does the paper provide the full set of assumptions and a complete (and correct) proof?

Answer: [Yes]

Justification: *All the proofs of the theorems and propositions stated in the main paper are provided in the appendix with clear references.*

Guidelines:

- The answer NA means that the paper does not include theoretical results.
- All the theorems, formulas, and proofs in the paper should be numbered and cross-referenced.
- All assumptions should be clearly stated or referenced in the statement of any theorems.
- The proofs can either appear in the main paper or the supplemental material, but if they appear in the supplemental material, the authors are encouraged to provide a short proof sketch to provide intuition.
- Inversely, any informal proof provided in the core of the paper should be complemented by formal proofs provided in appendix or supplemental material.
- Theorems and Lemmas that the proof relies upon should be properly referenced.

### 4. Experimental result reproducibility

Question: Does the paper fully disclose all the information needed to reproduce the main experimental results of the paper to the extent that it affects the main claims and/or conclusions of the paper (regardless of whether the code and data are provided or not)?

Answer: [Yes]

Justification: *We provide details on the environments and hyper-parameter settings in the appendix. We also uploaded our source code for re-productivity purposes.*

Guidelines:

- The answer NA means that the paper does not include experiments.
- If the paper includes experiments, a No answer to this question will not be perceived well by the reviewers: Making the paper reproducible is important, regardless of whether the code and data are provided or not.
- If the contribution is a dataset and/or model, the authors should describe the steps taken to make their results reproducible or verifiable.
- Depending on the contribution, reproducibility can be accomplished in various ways. For example, if the contribution is a novel architecture, describing the architecture fully might suffice, or if the contribution is a specific model and empirical evaluation, it may be necessary to either make it possible for others to replicate the model with the same dataset, or provide access to the model. In general, releasing code and data is often one good way to accomplish this, but reproducibility can also be provided via detailed instructions for how to replicate the results, access to a hosted model (e.g., in the case of a large language model), releasing of a model checkpoint, or other means that are appropriate to the research performed.
- While NeurIPS does not require releasing code, the conference does require all submissions to provide some reasonable avenue for reproducibility, which may depend on the nature of the contribution. For example
  - (a) If the contribution is primarily a new algorithm, the paper should make it clear how to reproduce that algorithm.
  - (b) If the contribution is primarily a new model architecture, the paper should describe the architecture clearly and fully.
  - (c) If the contribution is a new model (e.g., a large language model), then there should either be a way to access this model for reproducing the results or a way to reproduce the model (e.g., with an open-source dataset or instructions for how to construct the dataset).
  - (d) We recognize that reproducibility may be tricky in some cases, in which case authors are welcome to describe the particular way they provide for reproducibility. In the case of closed-source models, it may be that access to the model is limited in some way (e.g., to registered users), but it should be possible for other researchers to have some path to reproducing or verifying the results.

## 5. Open access to data and code

Question: Does the paper provide open access to the data and code, with sufficient instructions to faithfully reproduce the main experimental results, as described in supplemental material?

Answer: [\[Yes\]](#)

Justification: *The data we used, along with our source code, has been uploaded with the main paper. We have also provided sufficient instructions for their use.*

Guidelines:

- The answer NA means that paper does not include experiments requiring code.
- Please see the NeurIPS code and data submission guidelines (<https://nips.cc/public/guides/CodeSubmissionPolicy>) for more details.
- While we encourage the release of code and data, we understand that this might not be possible, so “No” is an acceptable answer. Papers cannot be rejected simply for not including code, unless this is central to the contribution (e.g., for a new open-source benchmark).
- The instructions should contain the exact command and environment needed to run to reproduce the results. See the NeurIPS code and data submission guidelines (<https://nips.cc/public/guides/CodeSubmissionPolicy>) for more details.
- The authors should provide instructions on data access and preparation, including how to access the raw data, preprocessed data, intermediate data, and generated data, etc.
- The authors should provide scripts to reproduce all experimental results for the new proposed method and baselines. If only a subset of experiments are reproducible, they should state which ones are omitted from the script and why.

- At submission time, to preserve anonymity, the authors should release anonymized versions (if applicable).
- Providing as much information as possible in supplemental material (appended to the paper) is recommended, but including URLs to data and code is permitted.

## 6. Experimental setting/details

Question: Does the paper specify all the training and test details (e.g., data splits, hyper-parameters, how they were chosen, type of optimizer, etc.) necessary to understand the results?

Answer: [\[Yes\]](#)

Justification: *All the details are provided in the main paper and appendix.*

Guidelines:

- The answer NA means that the paper does not include experiments.
- The experimental setting should be presented in the core of the paper to a level of detail that is necessary to appreciate the results and make sense of them.
- The full details can be provided either with the code, in appendix, or as supplemental material.

## 7. Experiment statistical significance

Question: Does the paper report error bars suitably and correctly defined or other appropriate information about the statistical significance of the experiments?

Answer: [\[Yes\]](#)

Justification: *We provides all the details in the appendix.*

Guidelines:

- The answer NA means that the paper does not include experiments.
- The authors should answer "Yes" if the results are accompanied by error bars, confidence intervals, or statistical significance tests, at least for the experiments that support the main claims of the paper.
- The factors of variability that the error bars are capturing should be clearly stated (for example, train/test split, initialization, random drawing of some parameter, or overall run with given experimental conditions).
- The method for calculating the error bars should be explained (closed form formula, call to a library function, bootstrap, etc.)
- The assumptions made should be given (e.g., Normally distributed errors).
- It should be clear whether the error bar is the standard deviation or the standard error of the mean.
- It is OK to report 1-sigma error bars, but one should state it. The authors should preferably report a 2-sigma error bar than state that they have a 96% CI, if the hypothesis of Normality of errors is not verified.
- For asymmetric distributions, the authors should be careful not to show in tables or figures symmetric error bars that would yield results that are out of range (e.g. negative error rates).
- If error bars are reported in tables or plots, The authors should explain in the text how they were calculated and reference the corresponding figures or tables in the text.

## 8. Experiments compute resources

Question: For each experiment, does the paper provide sufficient information on the computer resources (type of compute workers, memory, time of execution) needed to reproduce the experiments?

Answer: [\[Yes\]](#)

Justification: *We provides all the details in the appendix.*

Guidelines:

- The answer NA means that the paper does not include experiments.

- The paper should indicate the type of compute workers CPU or GPU, internal cluster, or cloud provider, including relevant memory and storage.
- The paper should provide the amount of compute required for each of the individual experimental runs as well as estimate the total compute.
- The paper should disclose whether the full research project required more compute than the experiments reported in the paper (e.g., preliminary or failed experiments that didn't make it into the paper).

## 9. Code of ethics

Question: Does the research conducted in the paper conform, in every respect, with the NeurIPS Code of Ethics <https://neurips.cc/public/EthicsGuidelines>?

Answer: [Yes]

Justification: [TODO]

Guidelines:

- The answer NA means that the authors have not reviewed the NeurIPS Code of Ethics.
- If the authors answer No, they should explain the special circumstances that require a deviation from the Code of Ethics.
- The authors should make sure to preserve anonymity (e.g., if there is a special consideration due to laws or regulations in their jurisdiction).

## 10. Broader impacts

Question: Does the paper discuss both potential positive societal impacts and negative societal impacts of the work performed?

Answer: [NA]

Justification: *The paper develops a general algorithm for multi-agent RL, which we have tested only in simulated environments. As such, we do not foresee any direct societal impact.*

Guidelines:

- The answer NA means that there is no societal impact of the work performed.
- If the authors answer NA or No, they should explain why their work has no societal impact or why the paper does not address societal impact.
- Examples of negative societal impacts include potential malicious or unintended uses (e.g., disinformation, generating fake profiles, surveillance), fairness considerations (e.g., deployment of technologies that could make decisions that unfairly impact specific groups), privacy considerations, and security considerations.
- The conference expects that many papers will be foundational research and not tied to particular applications, let alone deployments. However, if there is a direct path to any negative applications, the authors should point it out. For example, it is legitimate to point out that an improvement in the quality of generative models could be used to generate deepfakes for disinformation. On the other hand, it is not needed to point out that a generic algorithm for optimizing neural networks could enable people to train models that generate Deepfakes faster.
- The authors should consider possible harms that could arise when the technology is being used as intended and functioning correctly, harms that could arise when the technology is being used as intended but gives incorrect results, and harms following from (intentional or unintentional) misuse of the technology.
- If there are negative societal impacts, the authors could also discuss possible mitigation strategies (e.g., gated release of models, providing defenses in addition to attacks, mechanisms for monitoring misuse, mechanisms to monitor how a system learns from feedback over time, improving the efficiency and accessibility of ML).

## 11. Safeguards

Question: Does the paper describe safeguards that have been put in place for responsible release of data or models that have a high risk for misuse (e.g., pretrained language models, image generators, or scraped datasets)?

Answer: [NA]

1192 Justification: **[TODO]**  
1193 Guidelines:  
1194 • The answer NA means that the paper poses no such risks.  
1195 • Released models that have a high risk for misuse or dual-use should be released with  
1196 necessary safeguards to allow for controlled use of the model, for example by requiring  
1197 that users adhere to usage guidelines or restrictions to access the model or implementing  
1198 safety filters.  
1199 • Datasets that have been scraped from the Internet could pose safety risks. The authors  
1200 should describe how they avoided releasing unsafe images.  
1201 • We recognize that providing effective safeguards is challenging, and many papers do  
1202 not require this, but we encourage authors to take this into account and make a best  
1203 faith effort.

## 1204 12. Licenses for existing assets

1205 Question: Are the creators or original owners of assets (e.g., code, data, models), used in  
1206 the paper, properly credited and are the license and terms of use explicitly mentioned and  
1207 properly respected?

1208 Answer: **[Yes]**

1209 Justification: *We have provided clear citations to the source code and data we used in the*  
1210 *paper.*

1211 Guidelines:  
1212 • The answer NA means that the paper does not use existing assets.  
1213 • The authors should cite the original paper that produced the code package or dataset.  
1214 • The authors should state which version of the asset is used and, if possible, include a  
1215 URL.  
1216 • The name of the license (e.g., CC-BY 4.0) should be included for each asset.  
1217 • For scraped data from a particular source (e.g., website), the copyright and terms of  
1218 service of that source should be provided.  
1219 • If assets are released, the license, copyright information, and terms of use in the  
1220 package should be provided. For popular datasets, `paperswithcode.com/datasets`  
1221 has curated licenses for some datasets. Their licensing guide can help determine the  
1222 license of a dataset.  
1223 • For existing datasets that are re-packaged, both the original license and the license of  
1224 the derived asset (if it has changed) should be provided.  
1225 • If this information is not available online, the authors are encouraged to reach out to  
1226 the asset's creators.

## 1227 13. New assets

1228 Question: Are new assets introduced in the paper well documented and is the documentation  
1229 provided alongside the assets?

1230 Answer: **[Yes]**

1231 Justification: *Our source code is submitted alongside the paper, accompanied by sufficient*  
1232 *instructions. We will share the code publicly for re-productibility or benchmarking purposes.*

1233 Guidelines:  
1234 • The answer NA means that the paper does not release new assets.  
1235 • Researchers should communicate the details of the dataset/code/model as part of their  
1236 submissions via structured templates. This includes details about training, license,  
1237 limitations, etc.  
1238 • The paper should discuss whether and how consent was obtained from people whose  
1239 asset is used.  
1240 • At submission time, remember to anonymize your assets (if applicable). You can either  
1241 create an anonymized URL or include an anonymized zip file.

## 1242 14. Crowdsourcing and research with human subjects



1243 Question: For crowdsourcing experiments and research with human subjects, does the paper  
 1244 include the full text of instructions given to participants and screenshots, if applicable, as  
 1245 well as details about compensation (if any)?

1246 Answer: [NA]

1247 Justification: [TODO]

1248 Guidelines:

- 1249 • The answer NA means that the paper does not involve crowdsourcing nor research with
- 1250 human subjects.
- 1251 • Including this information in the supplemental material is fine, but if the main contribu-
- 1252 tion of the paper involves human subjects, then as much detail as possible should be
- 1253 included in the main paper.
- 1254 • According to the NeurIPS Code of Ethics, workers involved in data collection, curation,
- 1255 or other labor should be paid at least the minimum wage in the country of the data
- 1256 collector.

1257 **15. Institutional review board (IRB) approvals or equivalent for research with human**  
 1258 **subjects**

1259 Question: Does the paper describe potential risks incurred by study participants, whether  
 1260 such risks were disclosed to the subjects, and whether Institutional Review Board (IRB)  
 1261 approvals (or an equivalent approval/review based on the requirements of your country or  
 1262 institution) were obtained?

1263 Answer: [NA]

1264 Justification: [TODO]

1265 Guidelines:

- 1266 • The answer NA means that the paper does not involve crowdsourcing nor research with
- 1267 human subjects.
- 1268 • Depending on the country in which research is conducted, IRB approval (or equivalent)
- 1269 may be required for any human subjects research. If you obtained IRB approval, you
- 1270 should clearly state this in the paper.
- 1271 • We recognize that the procedures for this may vary significantly between institutions
- 1272 and locations, and we expect authors to adhere to the NeurIPS Code of Ethics and the
- 1273 guidelines for their institution.
- 1274 • For initial submissions, do not include any information that would break anonymity (if
- 1275 applicable), such as the institution conducting the review.

1276 **16. Declaration of LLM usage**

1277 Question: Does the paper describe the usage of LLMs if it is an important, original, or  
 1278 non-standard component of the core methods in this research? Note that if the LLM is used  
 1279 only for writing, editing, or formatting purposes and does not impact the core methodology,  
 1280 scientific rigor, or originality of the research, declaration is not required.

1281 Answer: [Yes]

1282 Justification: *We utilize LLMs in the first stage of our framework to help identify expert-*  
 1283 *quality trajectories from unlabeled data*

1284 Guidelines:

- 1285 • The answer NA means that the core method development in this research does not
- 1286 involve LLMs as any important, original, or non-standard components.
- 1287 • Please refer to our LLM policy (<https://neurips.cc/Conferences/2025/LLM>)
- 1288 for what should or should not be described.
