# Supplementary material (part 1 of 2)
Source: ML conference proceedings conference paper supplement (https://openreview.net/forum?id=krG6UHAvYr)

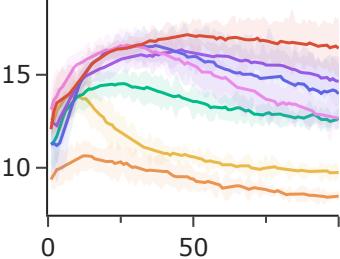

Supplement: supplementary_material [file 2c_vs_64zg_llm_returns.pdf › source_code/graphs/2c_vs_64zg_llm_returns.pdf]

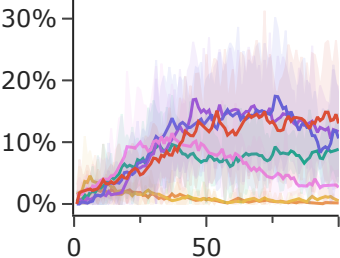

Supplement: supplementary_material [file 2c_vs_64zg_llm_winrates.pdf › source_code/graphs/2c_vs_64zg_llm_winrates.pdf]

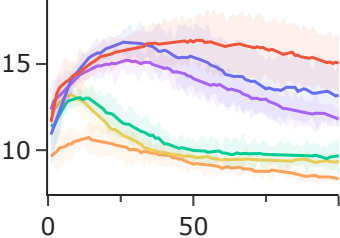

Supplement: supplementary_material [file 2c_vs_64zg_returns.pdf › source_code/graphs/2c_vs_64zg_returns.pdf]

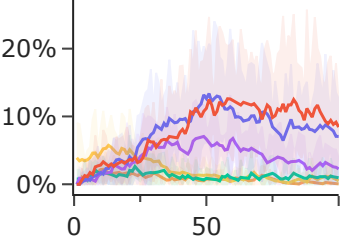

Supplement: supplementary_material [file 2c_vs_64zg_winrates.pdf › source_code/graphs/2c_vs_64zg_winrates.pdf]

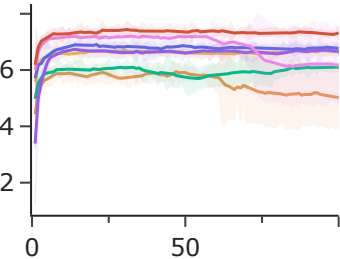

Supplement: supplementary_material [file 5m_vs_6m_llm_returns.pdf › source_code/graphs/5m_vs_6m_llm_returns.pdf]

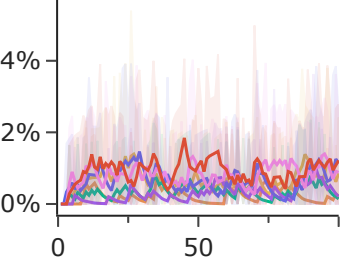

Supplement: supplementary_material [file 5m_vs_6m_llm_winrates.pdf › source_code/graphs/5m_vs_6m_llm_winrates.pdf]

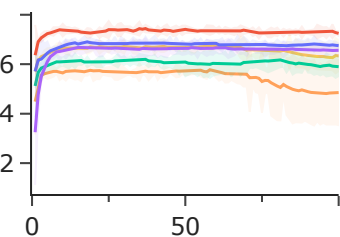

Supplement: supplementary_material [file 5m_vs_6m_returns.pdf › source_code/graphs/5m_vs_6m_returns.pdf]

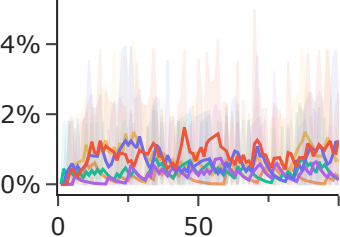

Supplement: supplementary_material [file 5m_vs_6m_winrates.pdf › source_code/graphs/5m_vs_6m_winrates.pdf]

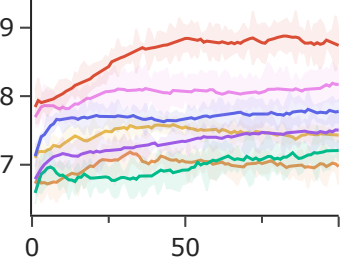

Supplement: supplementary_material [file 6h_vs_8z_llm_returns.pdf › source_code/graphs/6h_vs_8z_llm_returns.pdf]

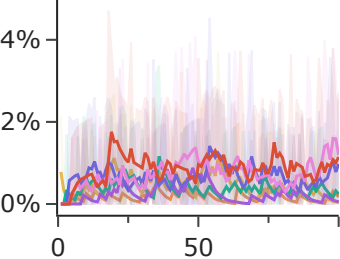

Supplement: supplementary_material [file 6h_vs_8z_llm_winrates.pdf › source_code/graphs/6h_vs_8z_llm_winrates.pdf]

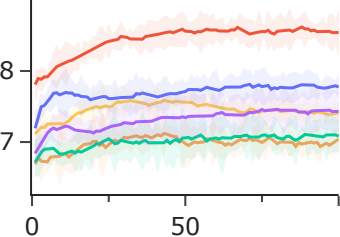

Supplement: supplementary_material [file 6h_vs_8z_returns.pdf › source_code/graphs/6h_vs_8z_returns.pdf]

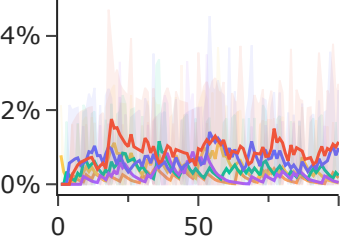

Supplement: supplementary_material [file 6h_vs_8z_winrates.pdf › source_code/graphs/6h_vs_8z_winrates.pdf]

MisoDICE ( $\alpha=0.00$ )   MisoDICE ( $\alpha=0.05$ )   MisoDICE ( $\alpha=0.10$ )   MisoDICE ( $\alpha=0.50$ )  
MisoDICE ( $\alpha=1.00$ )   MisoDICE ( $\alpha=10.0$ )

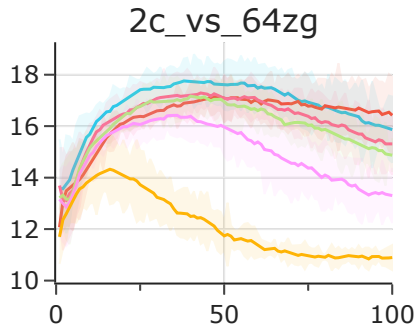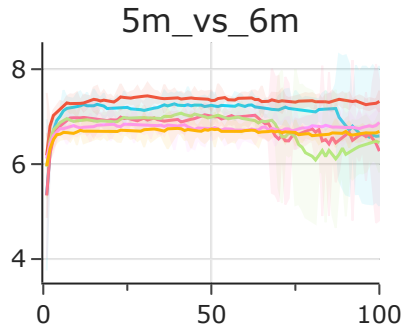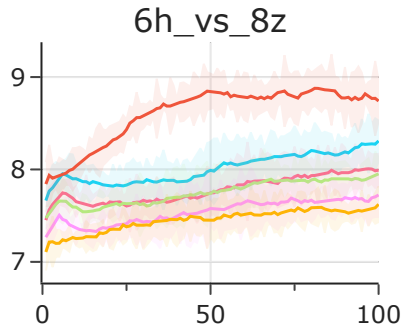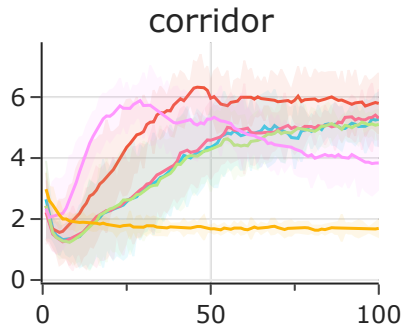

Supplement: supplementary_material [file Ablation_Alpha_SMACv1_Returns_LLM-based.pdf › source_code/graphs/Ablation_Alpha_SMACv1_Returns_LLM-based.pdf]

MisoDICE ( $\alpha=0.00$ ) MisoDICE ( $\alpha=0.05$ ) MisoDICE ( $\alpha=0.10$ ) MisoDICE ( $\alpha=0.50$ ) MisoDICE ( $\alpha=1.00$ ) MisoDICE ( $\alpha=10.0$ )

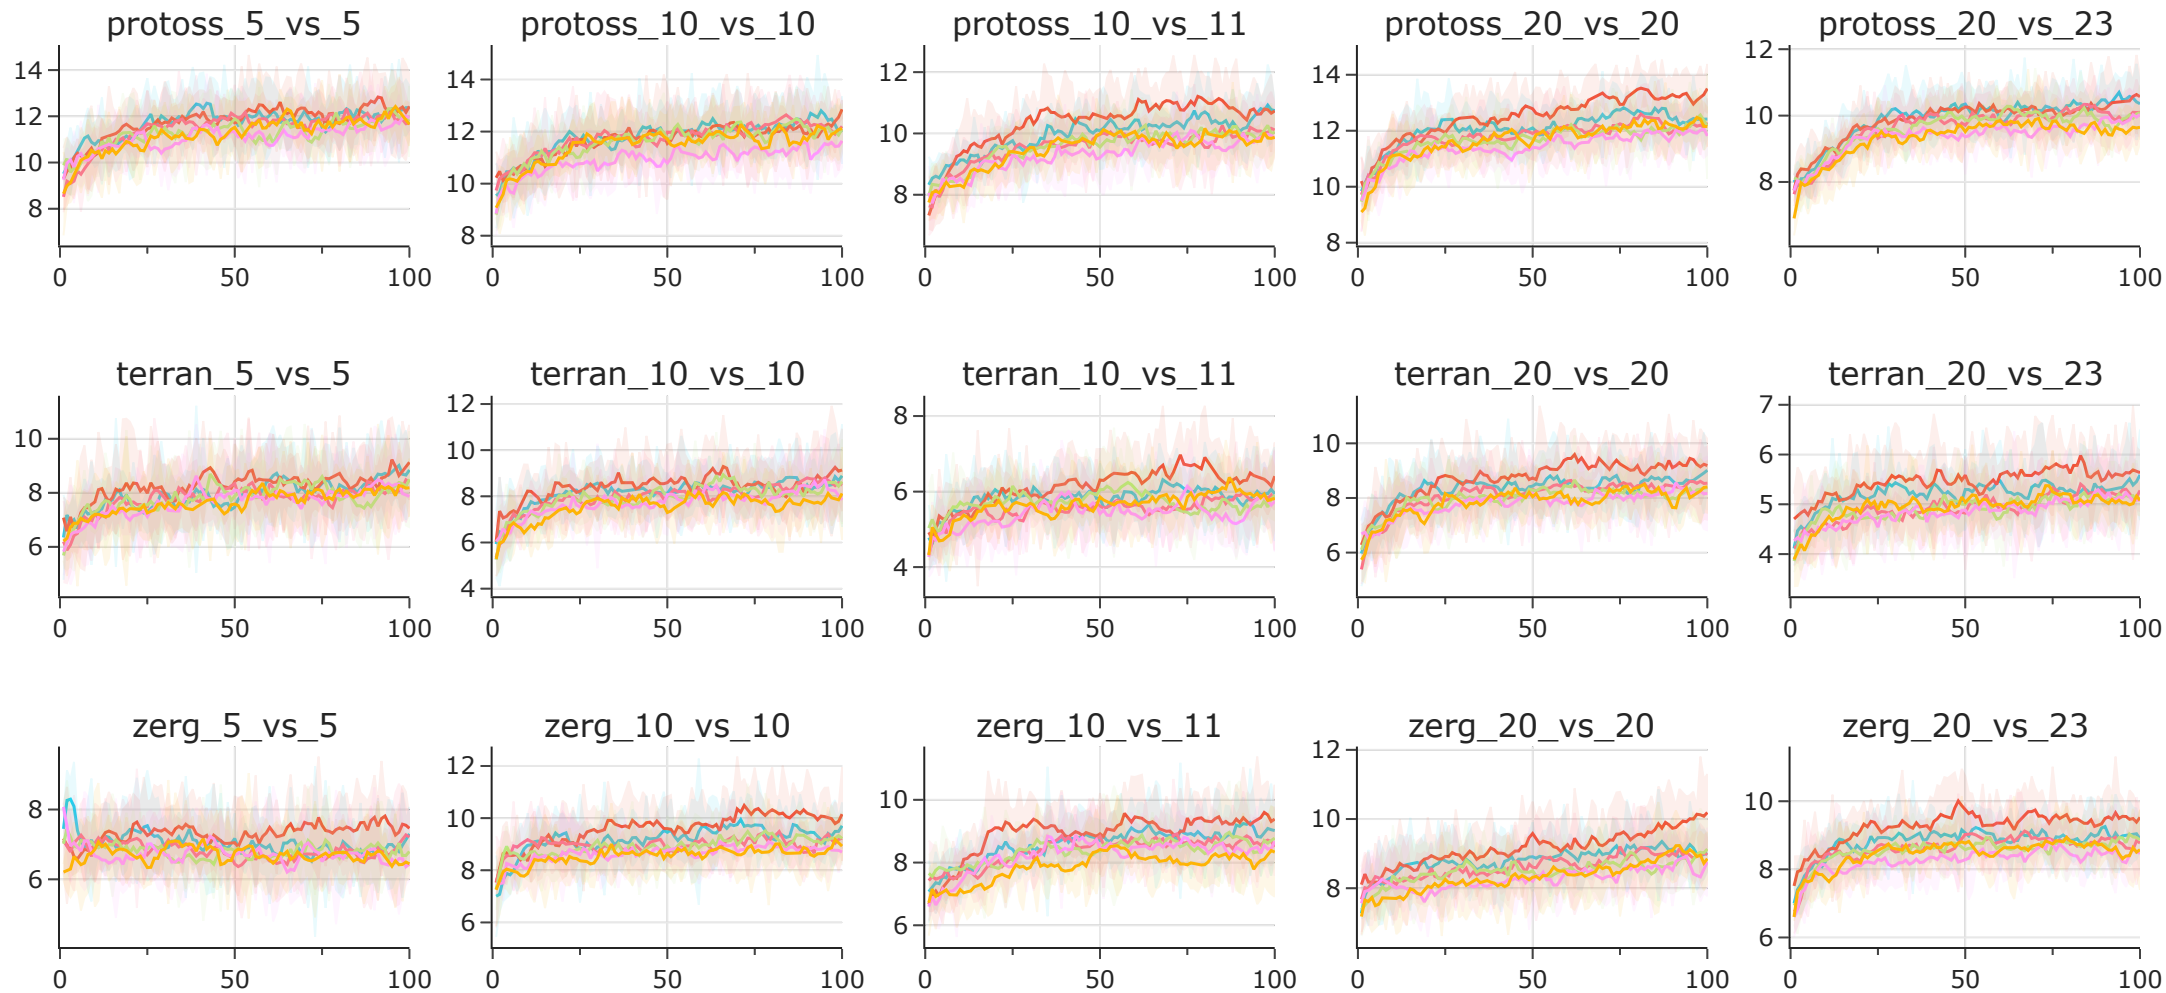

Supplement: supplementary_material [file Ablation_Alpha_SMACv2_Returns_LLM-based.pdf › source_code/graphs/Ablation_Alpha_SMACv2_Returns_LLM-based.pdf]

50 200 400 800 1200

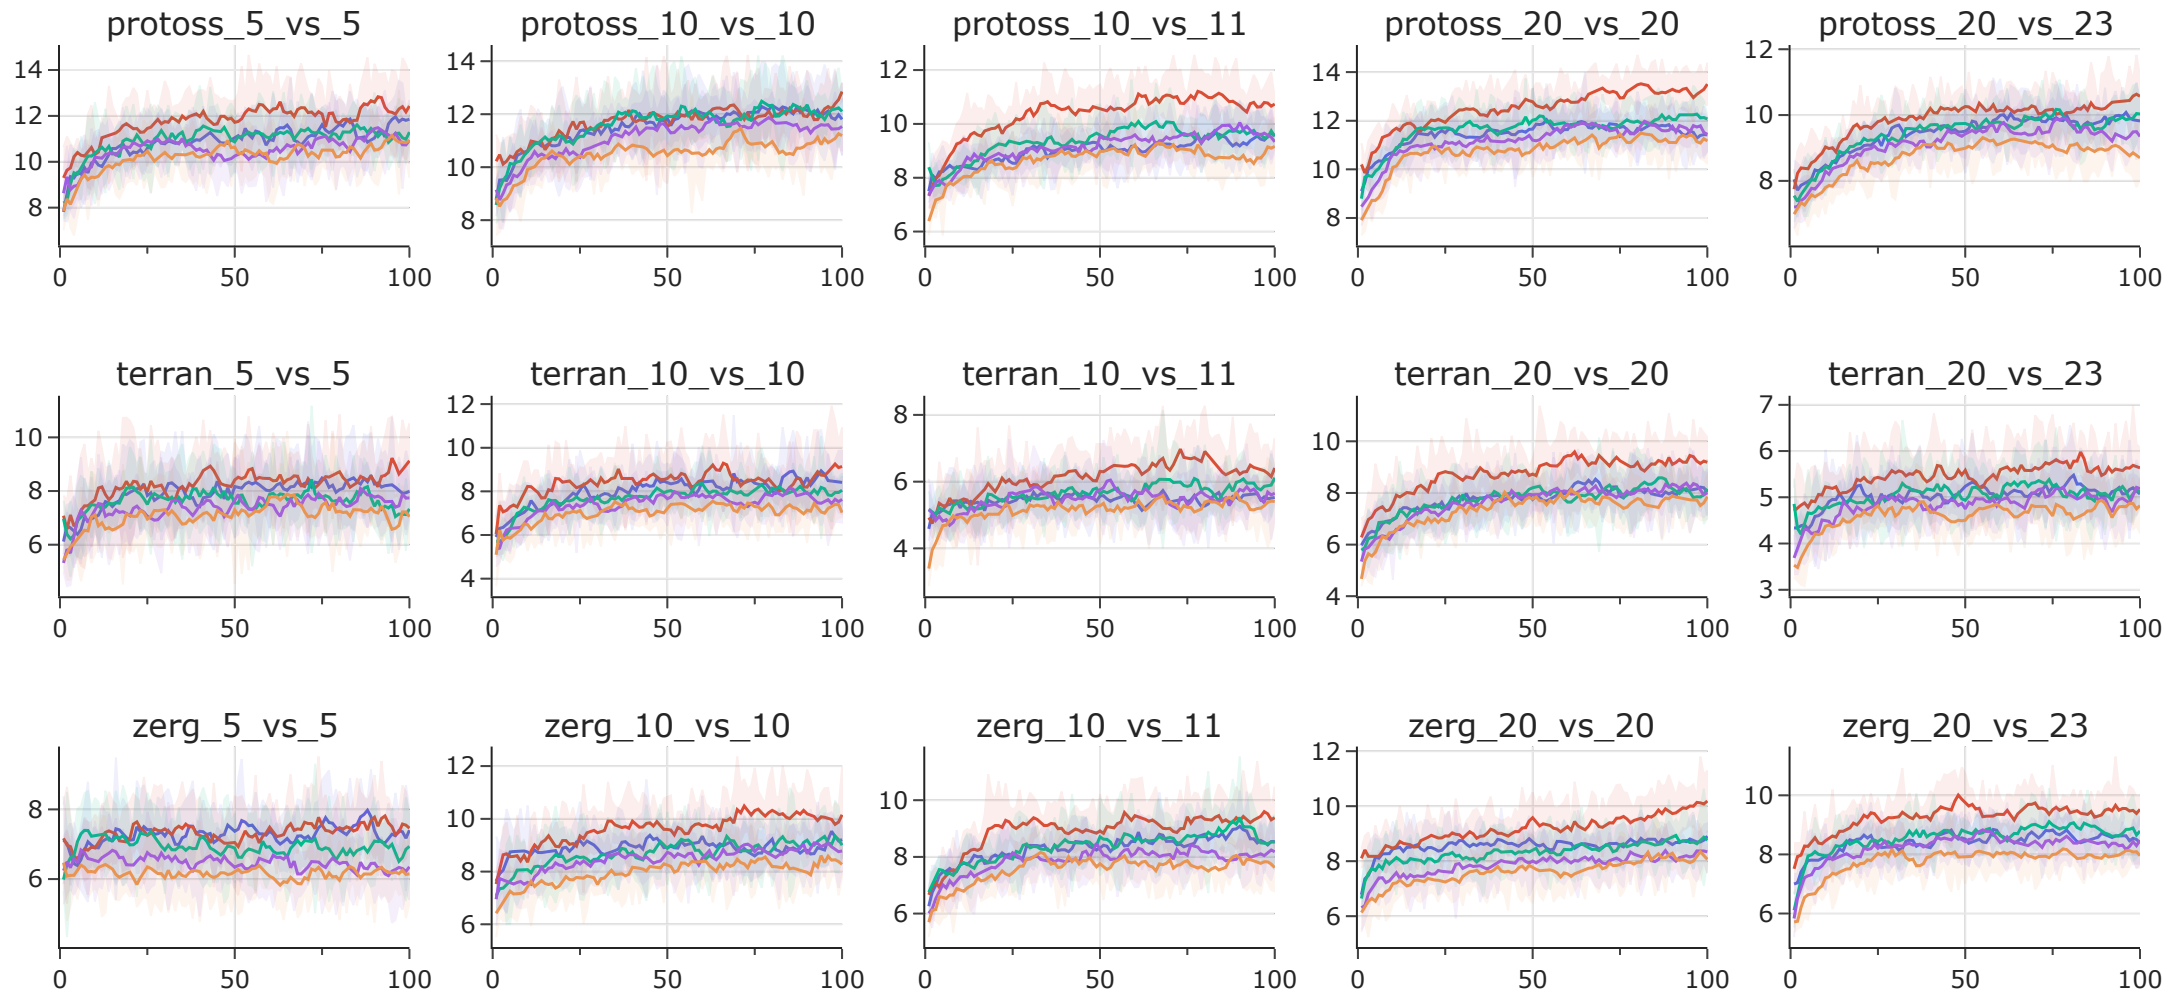

Supplement: supplementary_material [file Ablation_SMACv2_Returns_Rule-based.pdf › source_code/graphs/Ablation_SMACv2_Returns_Rule-based.pdf]

50 200 400 800 1200

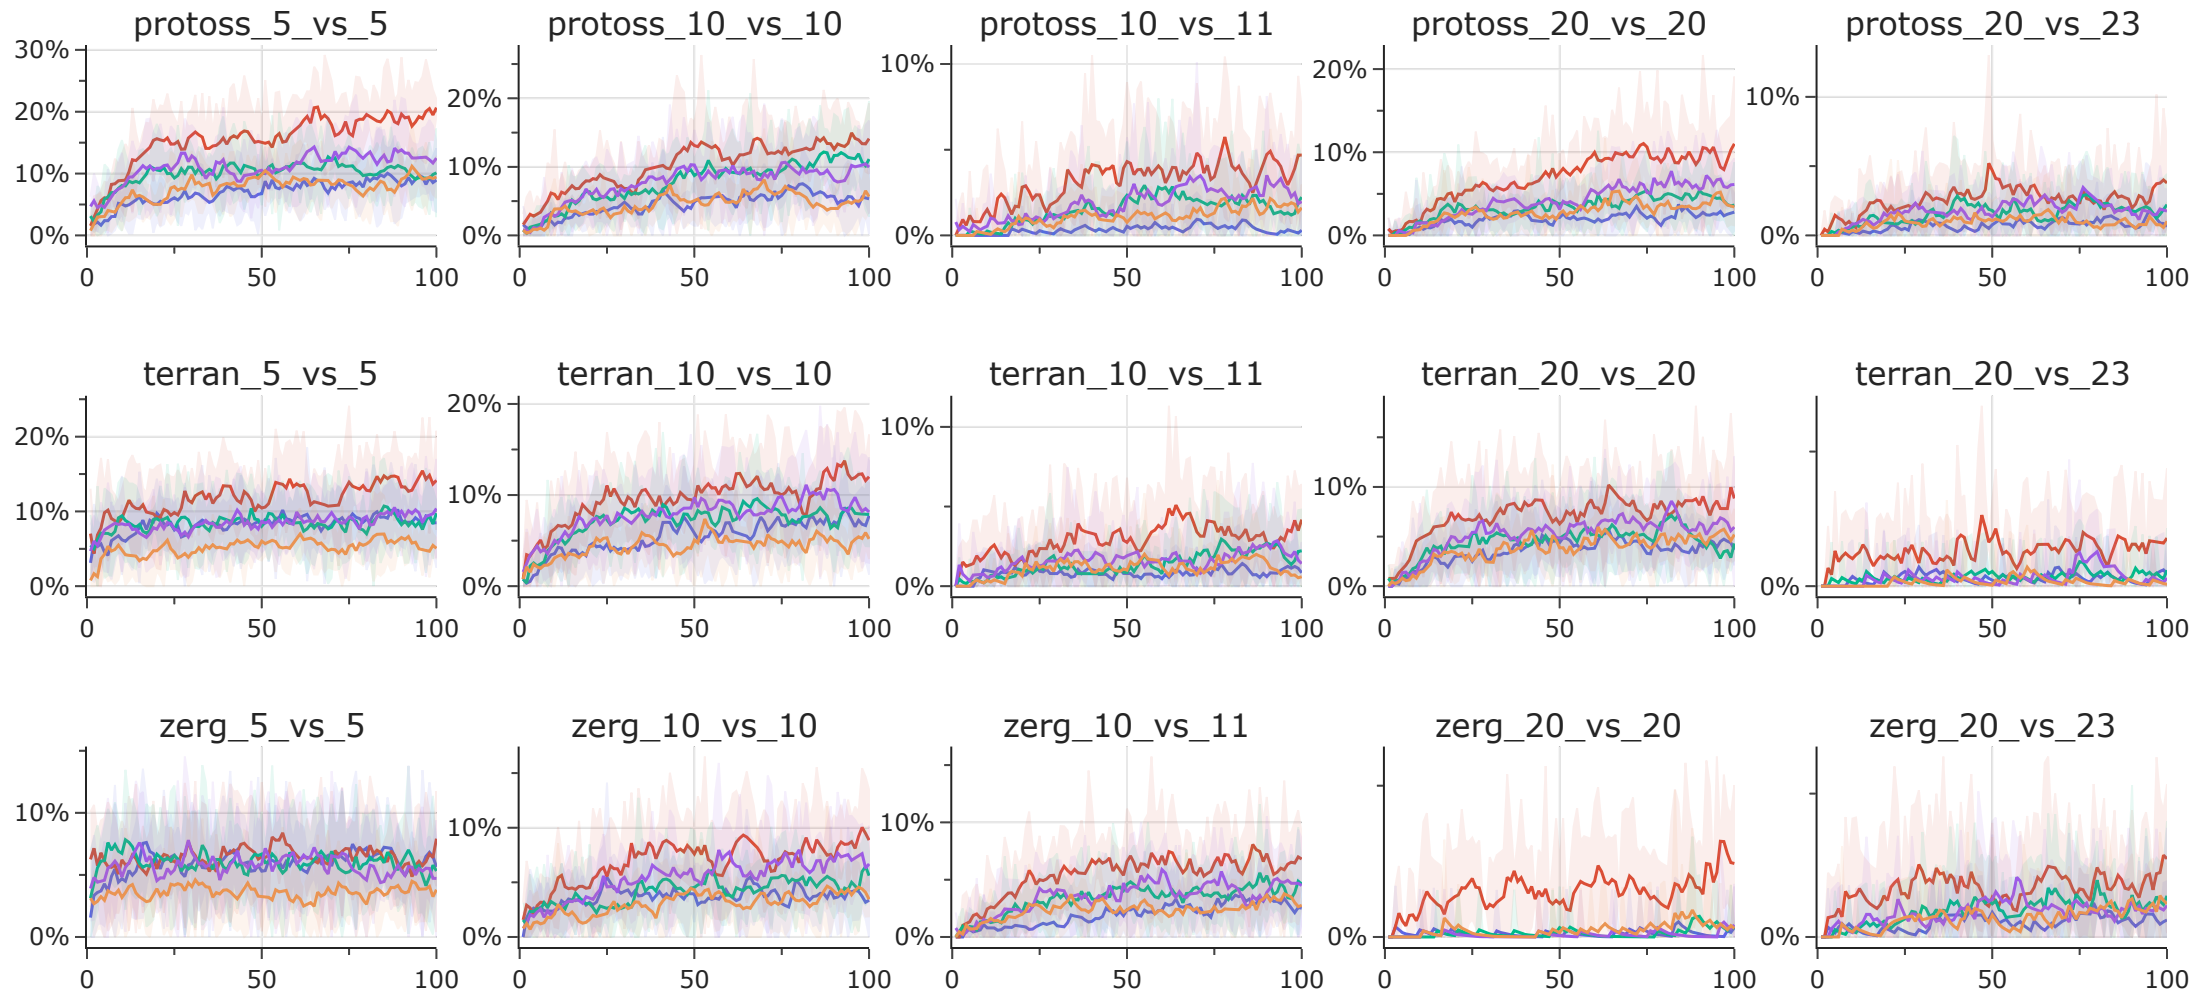

Supplement: supplementary_material [file Ablation_SMACv2_Winrates_Rule-based.pdf › source_code/graphs/Ablation_SMACv2_Winrates_Rule-based.pdf]

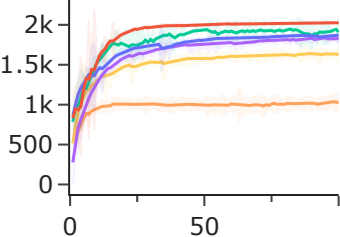

Supplement: supplementary_material [file Ant-v2_returns.pdf › source_code/graphs/Ant-v2_returns.pdf]

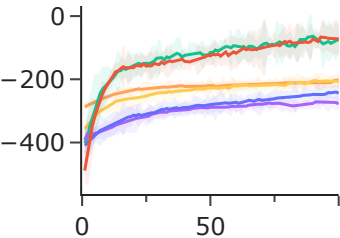

Supplement: supplementary_material [file HalfCheetah-v2_returns.pdf › source_code/graphs/HalfCheetah-v2_returns.pdf]

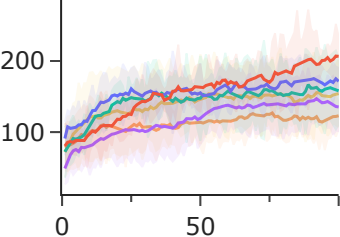

Supplement: supplementary_material [file Hopper-v2_returns.pdf › source_code/graphs/Hopper-v2_returns.pdf]

— BC ( $\beta=0.0$ ) — BC ( $\beta=0.5$ ) — BC ( $\beta=1.0$ ) — INDD — VDN — MisoDICE (ours)

Hopper-v2

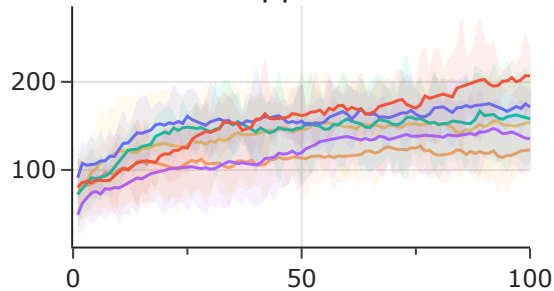

Ant-v2

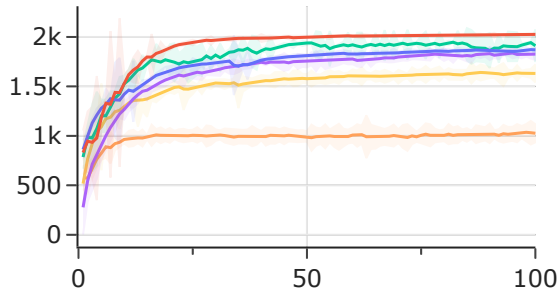

HalfCheetah-v2

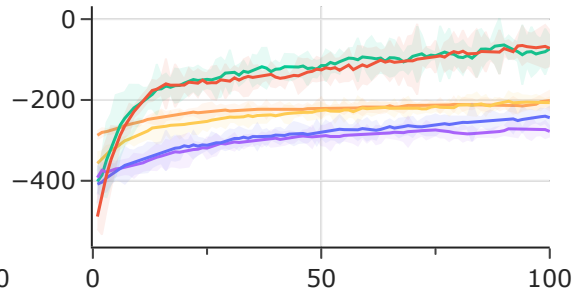

Supplement: supplementary_material [file MAMUJOCO_Returns_Rule-based.pdf › source_code/graphs/MAMUJOCO_Returns_Rule-based.pdf]

BC ( $\beta=0.0$ )   BC ( $\beta=0.5$ )   BC ( $\beta=1.0$ )   INDD   VDN   MARL-SL   MisoDICE (ours)

2c\_vs\_64zg

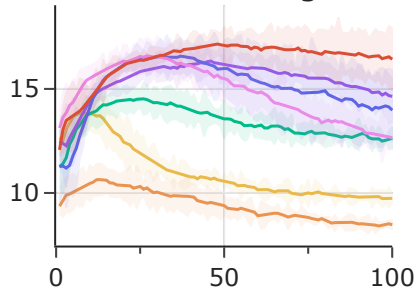

5m\_vs\_6m

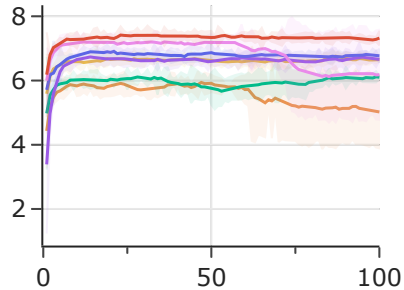

6h\_vs\_8z

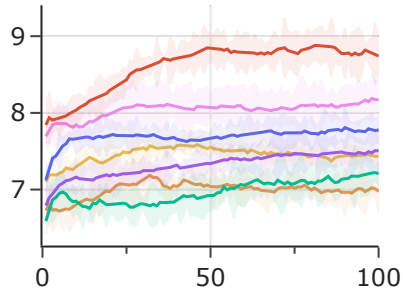

corridor

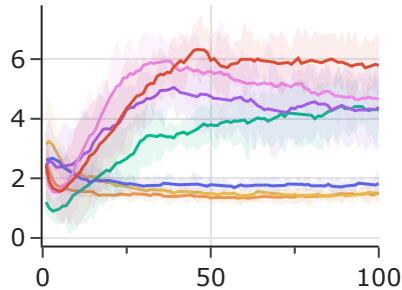

Supplement: supplementary_material [file SMACv1_Returns_LLM-based.pdf › source_code/graphs/SMACv1_Returns_LLM-based.pdf]

— BC ( $\beta=0.0$ ) — BC ( $\beta=0.5$ ) — BC ( $\beta=1.0$ ) — INDD — VDN — MisoDICE (ours)

2c\_vs\_64zg

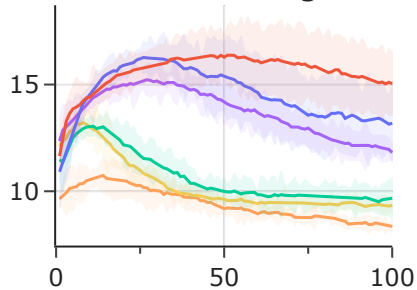

5m\_vs\_6m

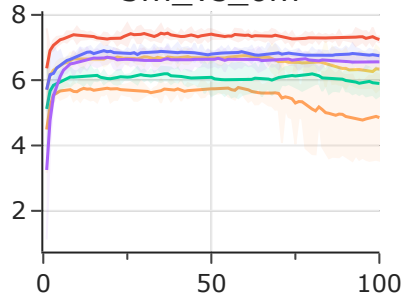

6h\_vs\_8z

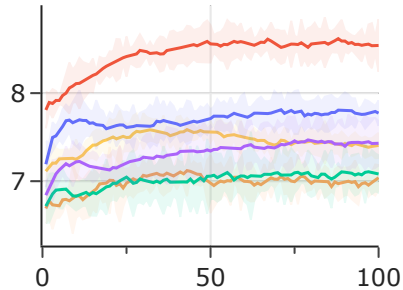

corridor

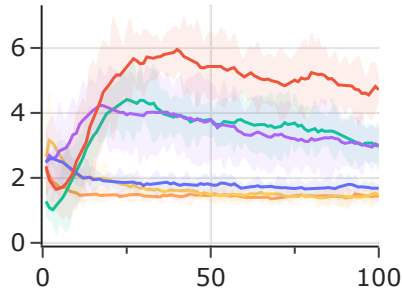

Supplement: supplementary_material [file SMACv1_Returns_Rule-based.pdf › source_code/graphs/SMACv1_Returns_Rule-based.pdf]

BC ( $\beta=0.0$ ) BC ( $\beta=0.5$ ) BC ( $\beta=1.0$ ) INDD VDN MARL-SL MisoDICE (ours)

2c\_vs\_64zg

5m\_vs\_6m

6h\_vs\_8z

corridor

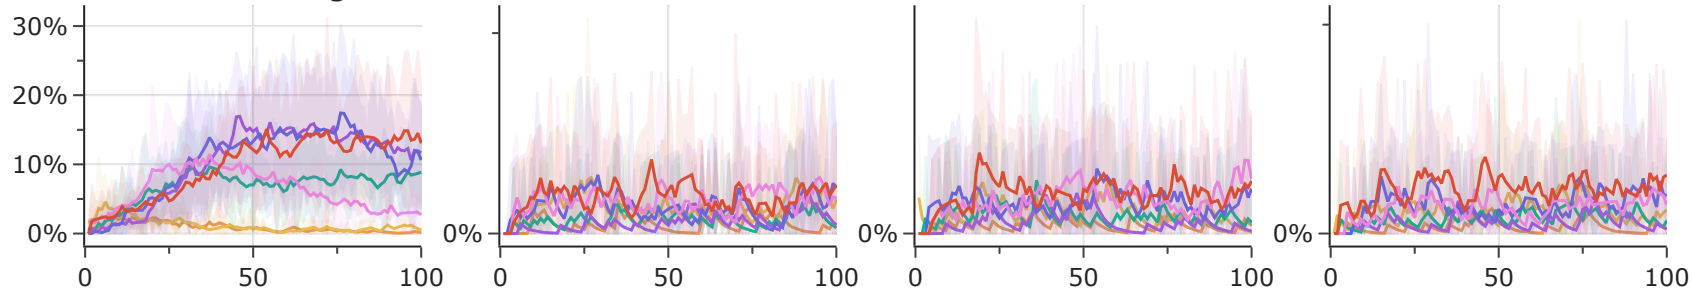

Supplement: supplementary_material [file SMACv1_Winrates_LLM-based.pdf › source_code/graphs/SMACv1_Winrates_LLM-based.pdf]

BC ( $\beta=0.0$ ) BC ( $\beta=0.5$ ) BC ( $\beta=1.0$ ) INDD VDN MisoDICE (ours)

2c\_vs\_64zg

5m\_vs\_6m

6h\_vs\_8z

corridor

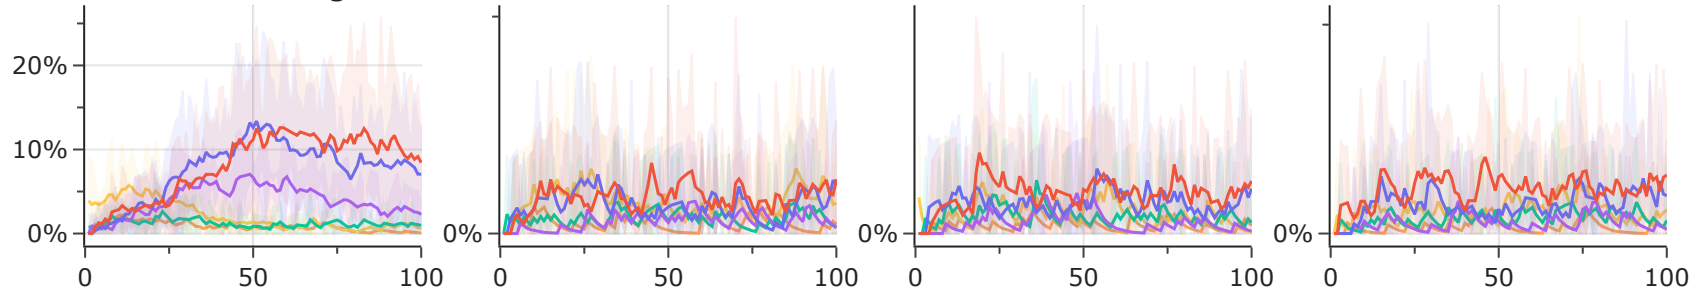

Supplement: supplementary_material [file SMACv1_Winrates_Rule-based.pdf › source_code/graphs/SMACv1_Winrates_Rule-based.pdf]

BC ( $\beta=0.0$ ) BC ( $\beta=0.5$ ) BC ( $\beta=1.0$ ) INDD VDN MARL-SL MisoDICE (ours)

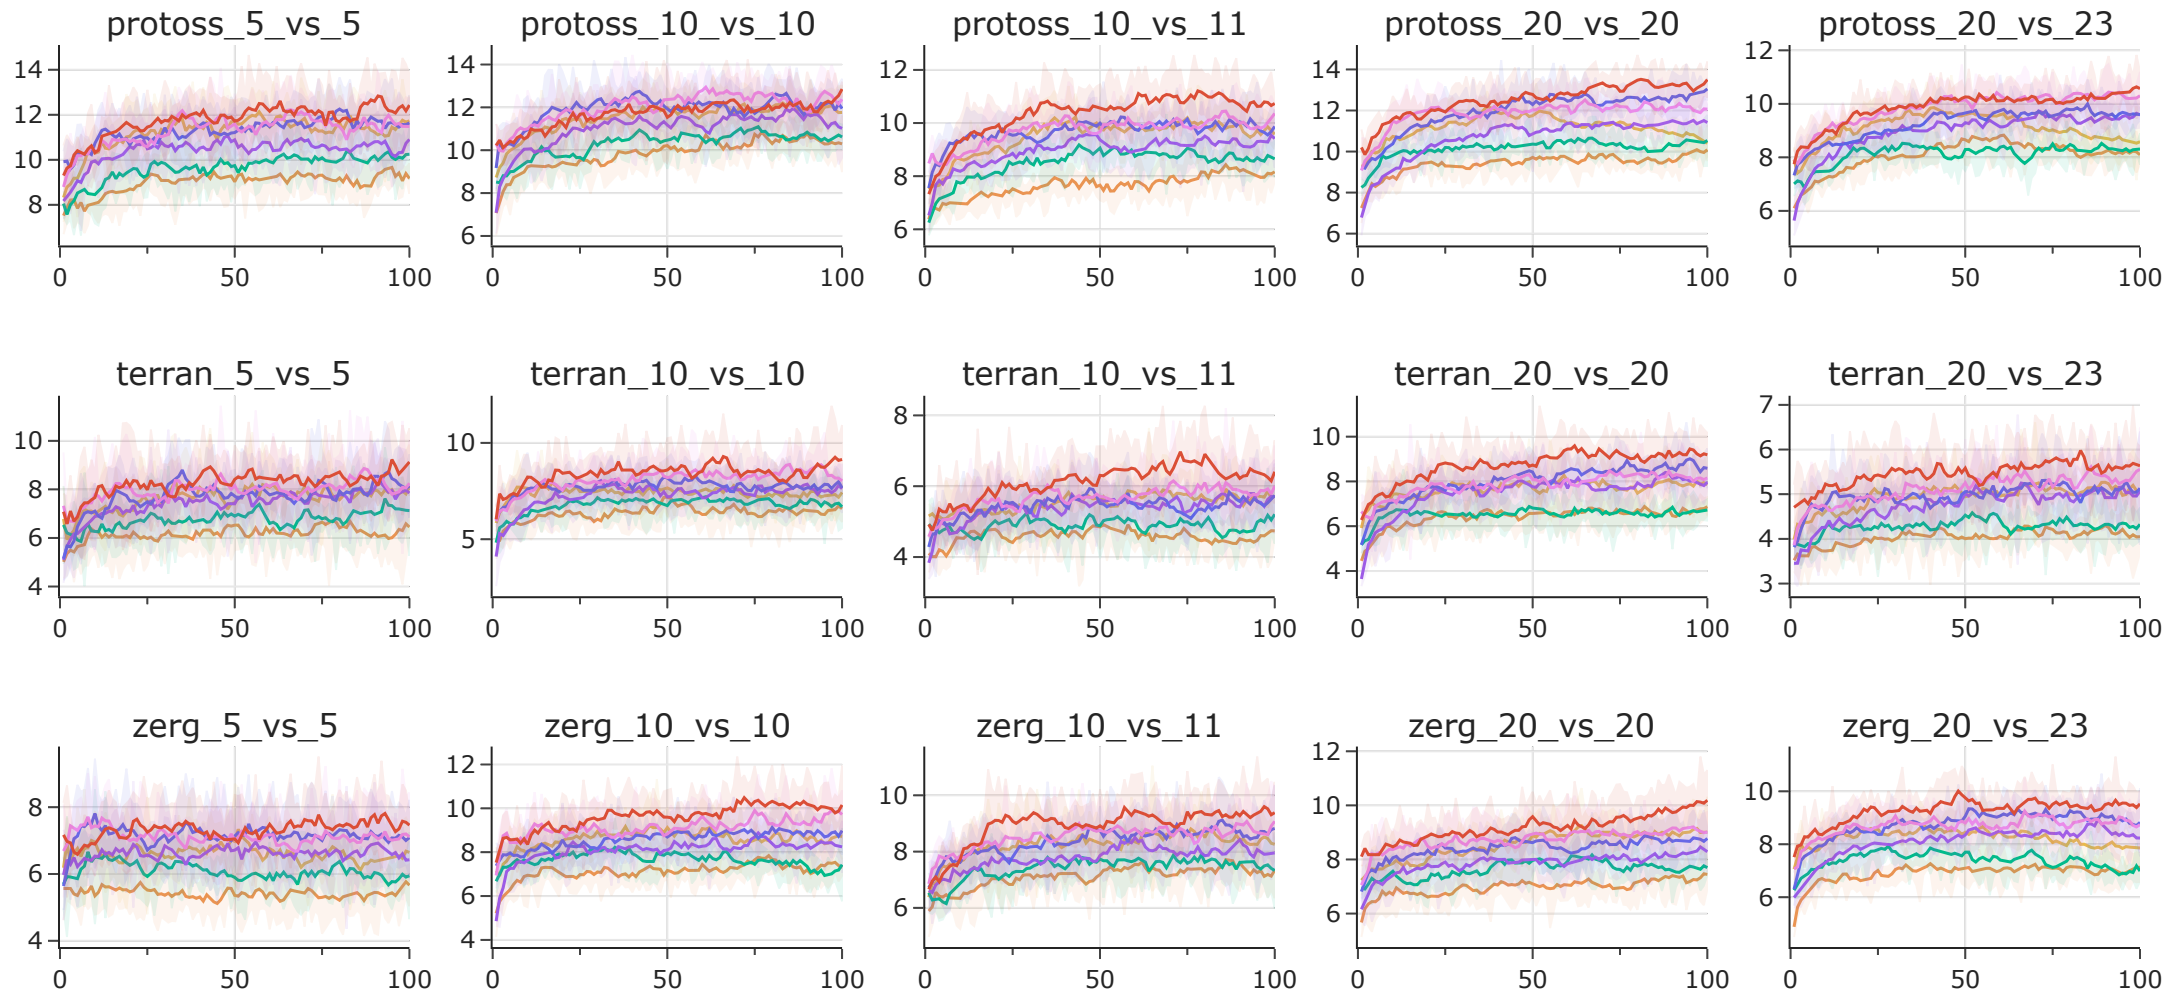

Supplement: supplementary_material [file SMACv2_Returns_LLM-based.pdf › source_code/graphs/SMACv2_Returns_LLM-based.pdf]

BC ( $\beta=0.0$ ) BC ( $\beta=0.5$ ) BC ( $\beta=1.0$ ) INDD VDN MisoDICE (ours)

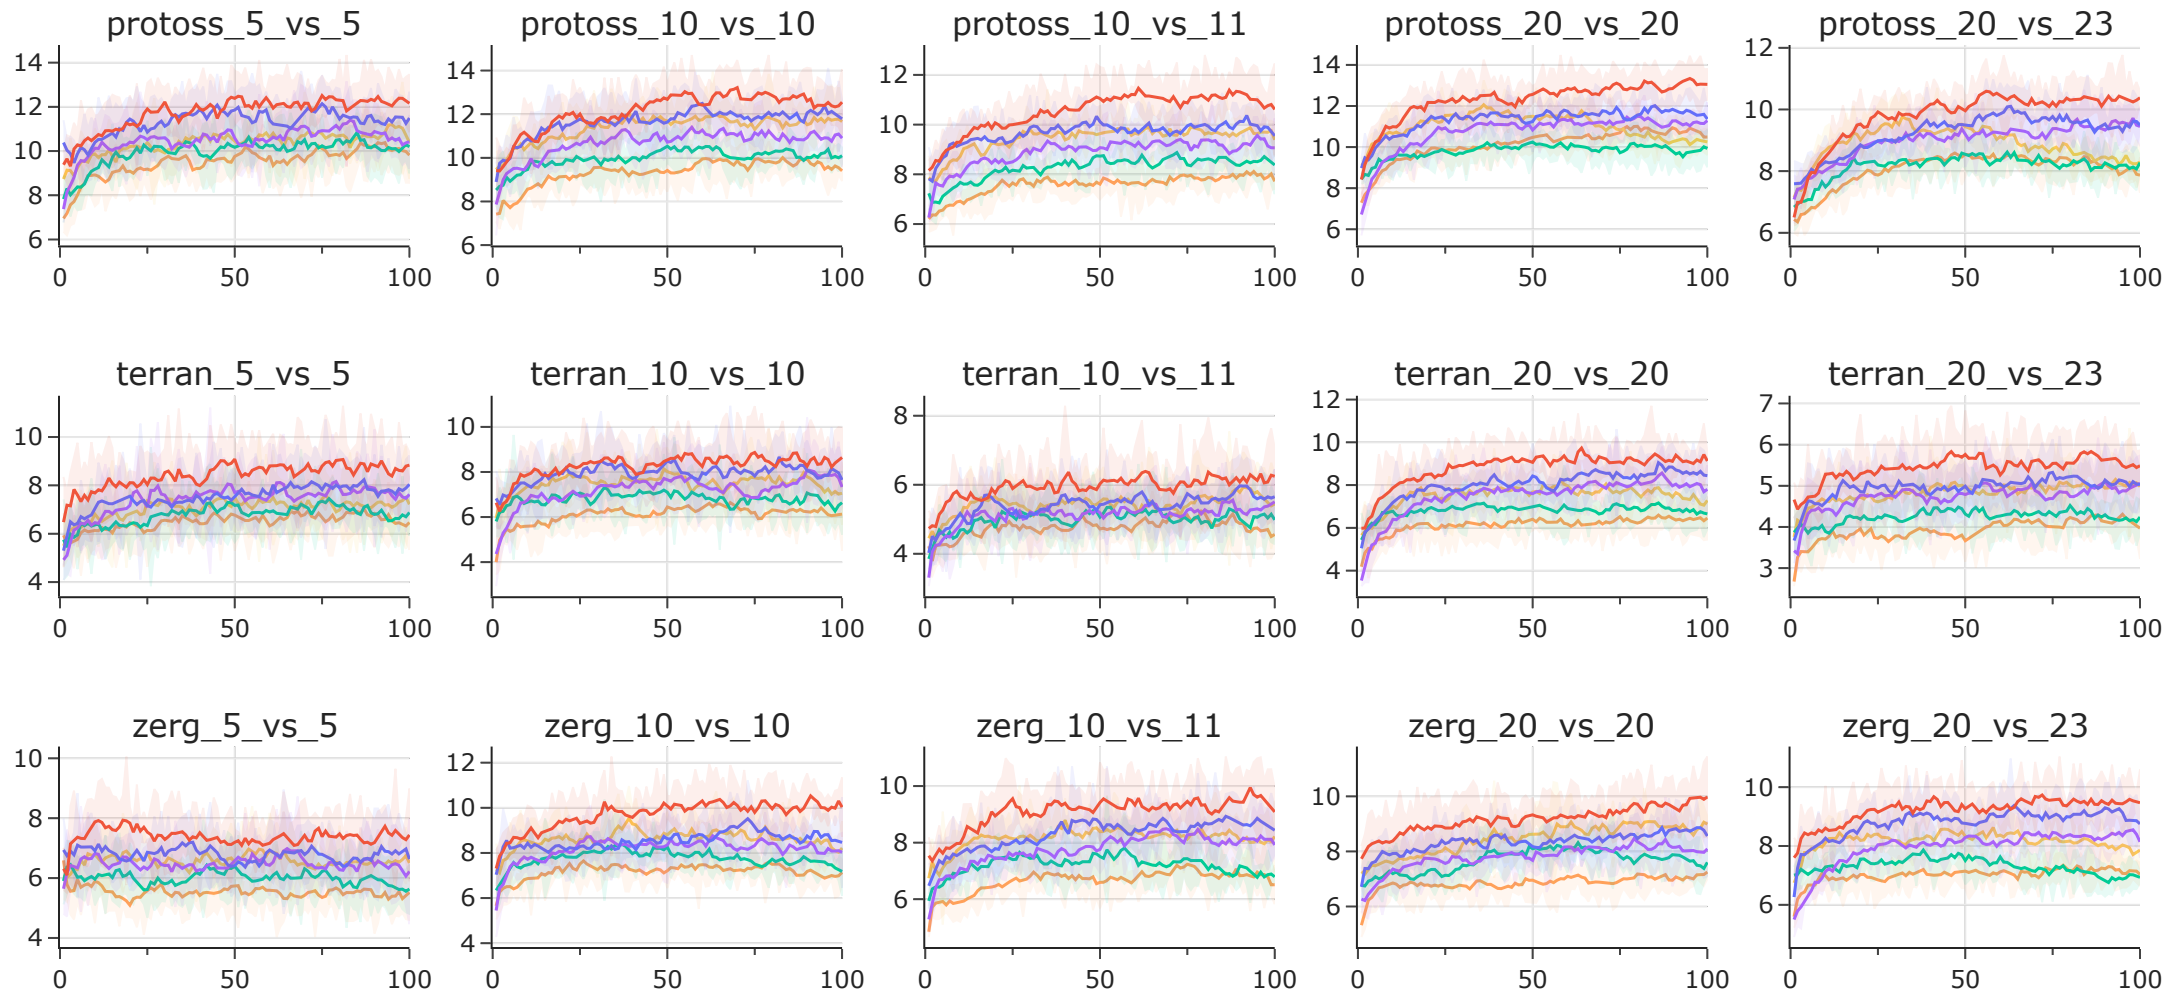

Supplement: supplementary_material [file SMACv2_Returns_Rule-based.pdf › source_code/graphs/SMACv2_Returns_Rule-based.pdf]

BC ( $\beta=0.0$ ) BC ( $\beta=0.5$ ) BC ( $\beta=1.0$ ) INDD VDN MARL-SL MisoDICE (ours)

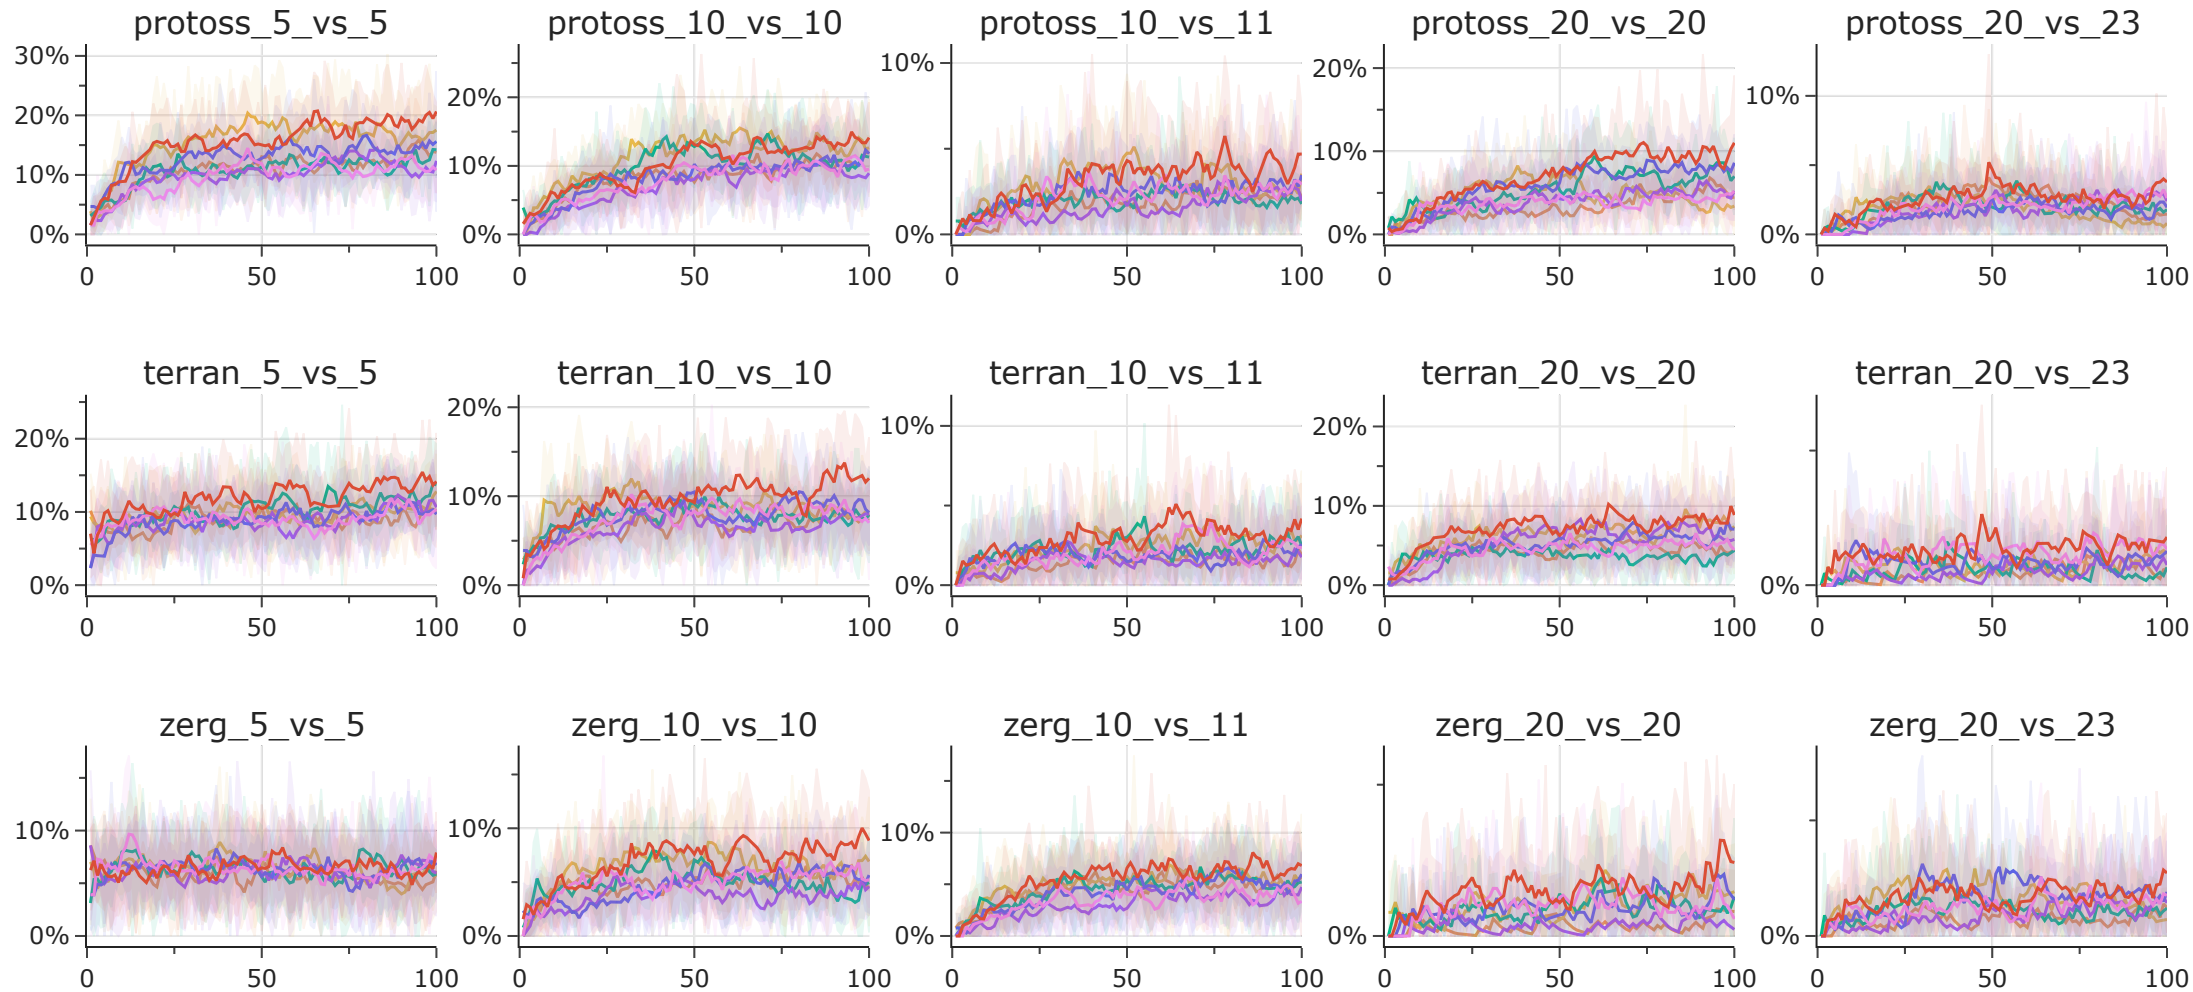

Supplement: supplementary_material [file SMACv2_Winrates_LLM-based.pdf › source_code/graphs/SMACv2_Winrates_LLM-based.pdf]

BC ( $\beta=0.0$ ) BC ( $\beta=0.5$ ) BC ( $\beta=1.0$ ) INDD VDN MisoDICE (ours)

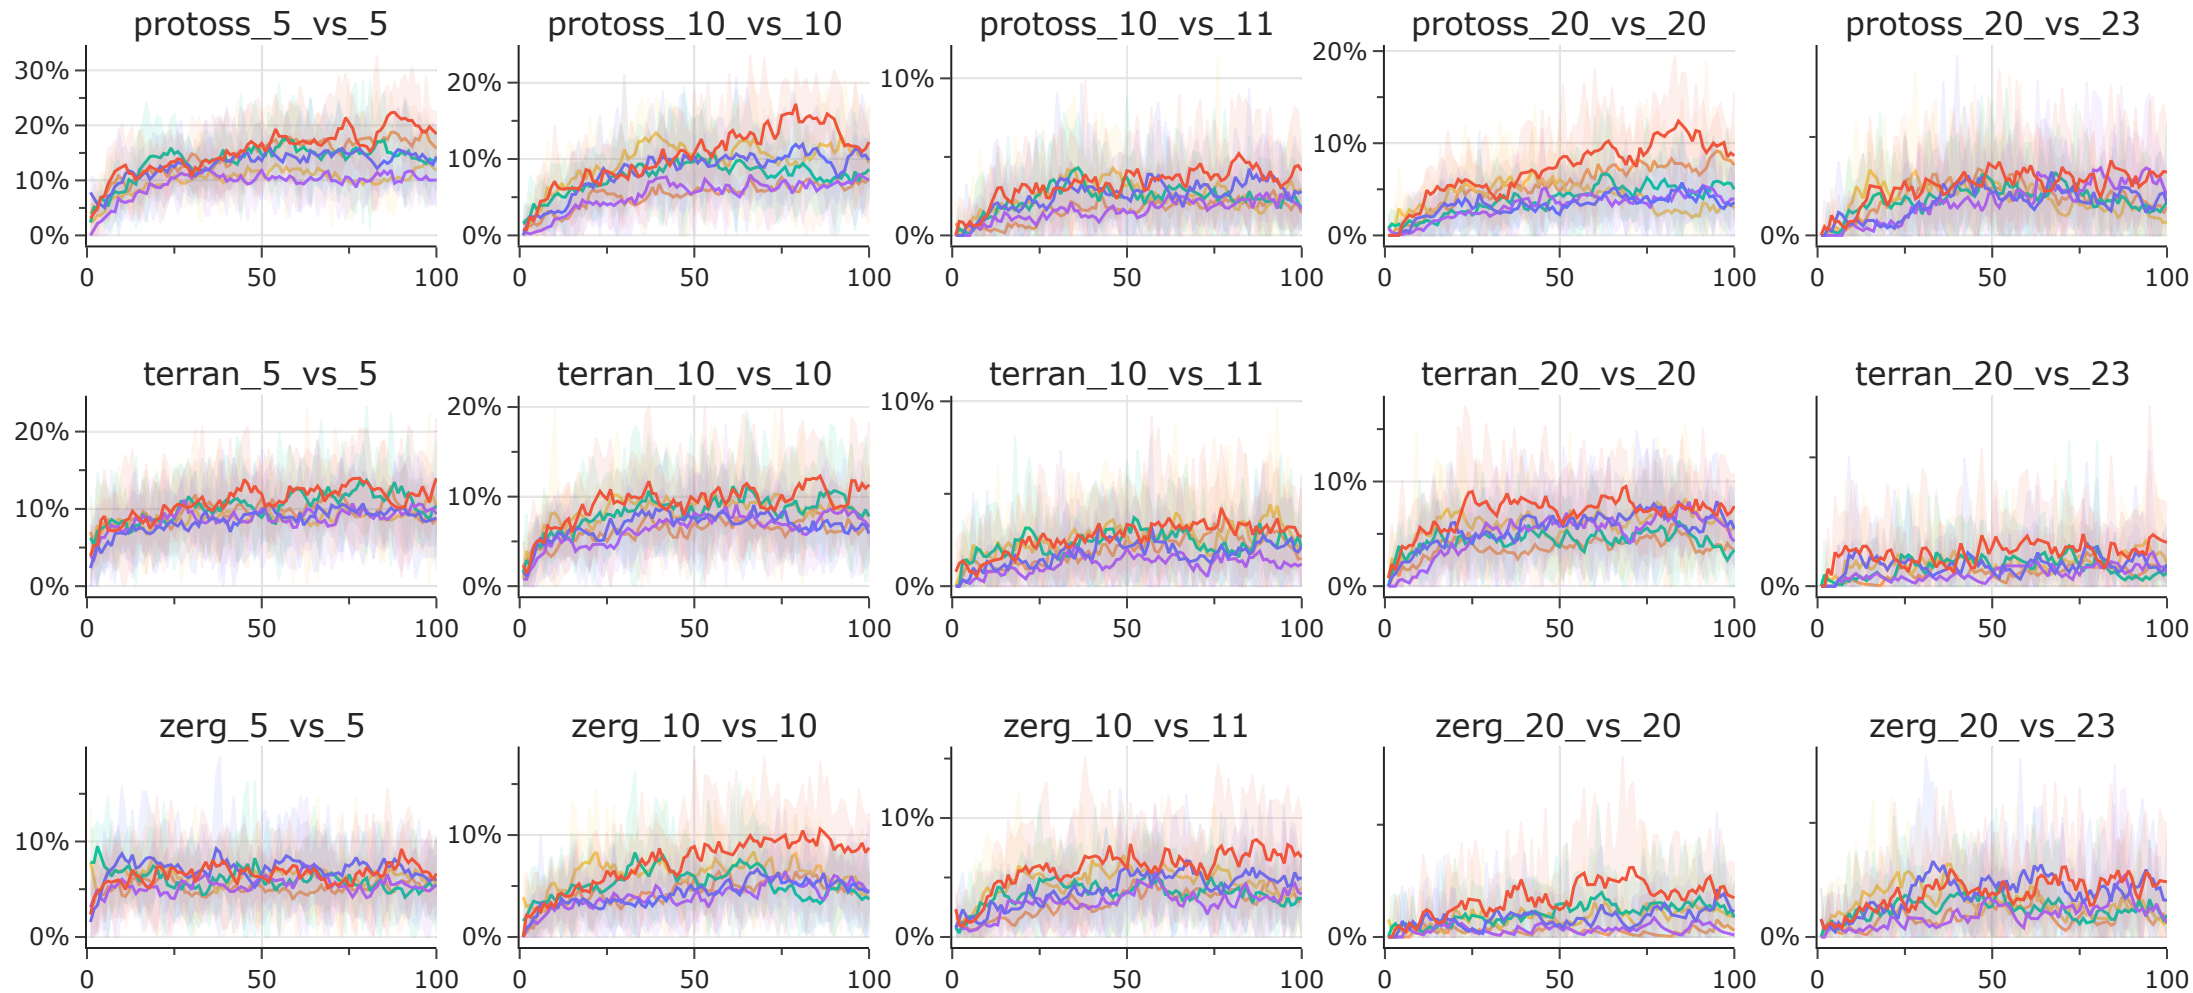

Supplement: supplementary_material [file SMACv2_Winrates_Rule-based.pdf › source_code/graphs/SMACv2_Winrates_Rule-based.pdf]

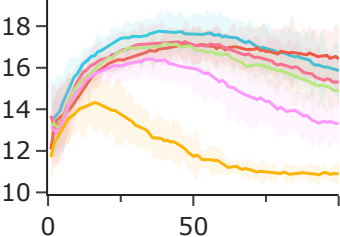

Supplement: supplementary_material [file ablation_2c_vs_64zg_llm_returns.pdf › source_code/graphs/ablation_2c_vs_64zg_llm_returns.pdf]

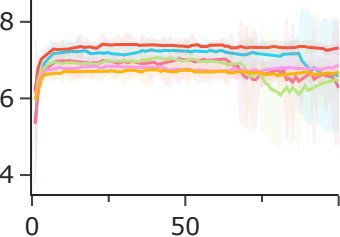

Supplement: supplementary_material [file ablation_5m_vs_6m_llm_returns.pdf › source_code/graphs/ablation_5m_vs_6m_llm_returns.pdf]

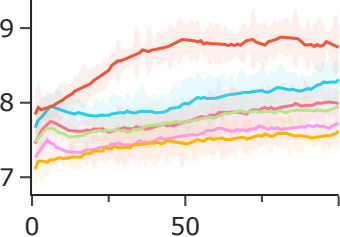

Supplement: supplementary_material [file ablation_6h_vs_8z_llm_returns.pdf › source_code/graphs/ablation_6h_vs_8z_llm_returns.pdf]

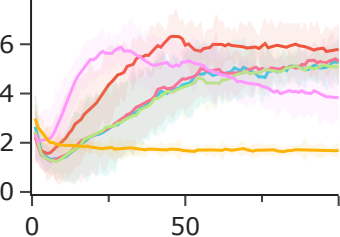

Supplement: supplementary_material [file ablation_corridor_llm_returns.pdf › source_code/graphs/ablation_corridor_llm_returns.pdf]

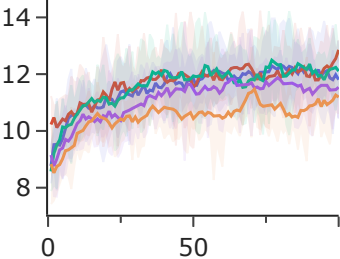

Supplement: supplementary_material [file ablation_protoss_10_vs_10_llm_returns.pdf › source_code/graphs/ablation_protoss_10_vs_10_llm_returns.pdf]

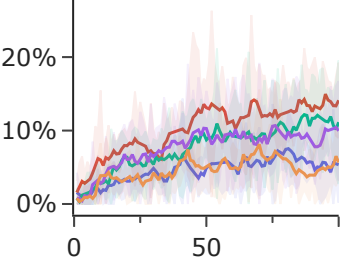

Supplement: supplementary_material [file ablation_protoss_10_vs_10_llm_winrates.pdf › source_code/graphs/ablation_protoss_10_vs_10_llm_winrates.pdf]

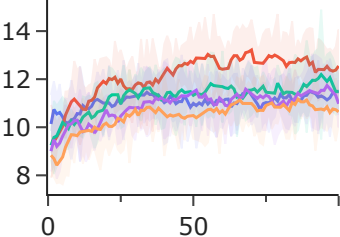

Supplement: supplementary_material [file ablation_protoss_10_vs_10_returns.pdf › source_code/graphs/ablation_protoss_10_vs_10_returns.pdf]

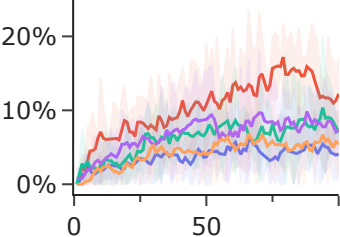

Supplement: supplementary_material [file ablation_protoss_10_vs_10_winrates.pdf › source_code/graphs/ablation_protoss_10_vs_10_winrates.pdf]

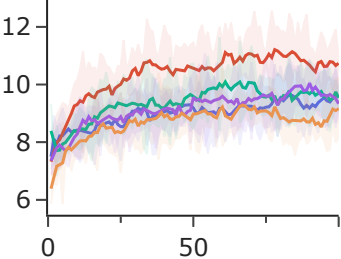

Supplement: supplementary_material [file ablation_protoss_10_vs_11_llm_returns.pdf › source_code/graphs/ablation_protoss_10_vs_11_llm_returns.pdf]

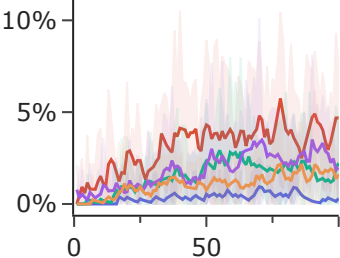

Supplement: supplementary_material [file ablation_protoss_10_vs_11_llm_winrates.pdf › source_code/graphs/ablation_protoss_10_vs_11_llm_winrates.pdf]

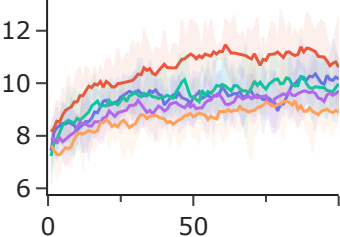

Supplement: supplementary_material [file ablation_protoss_10_vs_11_returns.pdf › source_code/graphs/ablation_protoss_10_vs_11_returns.pdf]

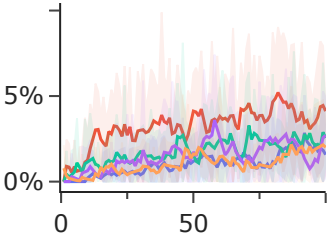

Supplement: supplementary_material [file ablation_protoss_10_vs_11_winrates.pdf › source_code/graphs/ablation_protoss_10_vs_11_winrates.pdf]

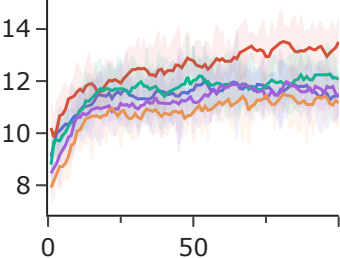

Supplement: supplementary_material [file ablation_protoss_20_vs_20_llm_returns.pdf › source_code/graphs/ablation_protoss_20_vs_20_llm_returns.pdf]

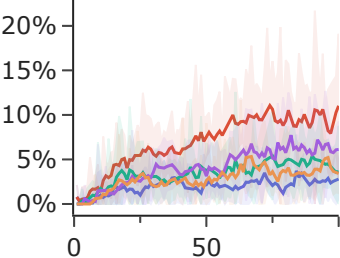

Supplement: supplementary_material [file ablation_protoss_20_vs_20_llm_winrates.pdf › source_code/graphs/ablation_protoss_20_vs_20_llm_winrates.pdf]

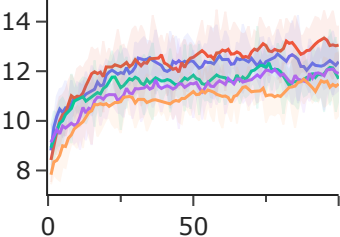

Supplement: supplementary_material [file ablation_protoss_20_vs_20_returns.pdf › source_code/graphs/ablation_protoss_20_vs_20_returns.pdf]

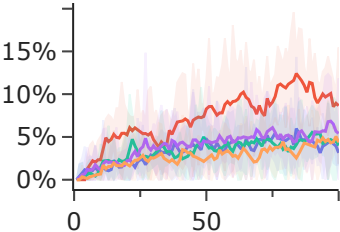

Supplement: supplementary_material [file ablation_protoss_20_vs_20_winrates.pdf › source_code/graphs/ablation_protoss_20_vs_20_winrates.pdf]

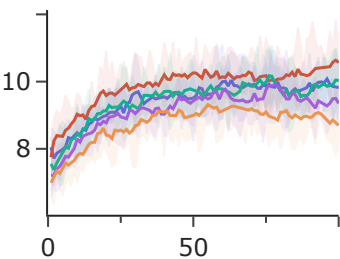

Supplement: supplementary_material [file ablation_protoss_20_vs_23_llm_returns.pdf › source_code/graphs/ablation_protoss_20_vs_23_llm_returns.pdf]

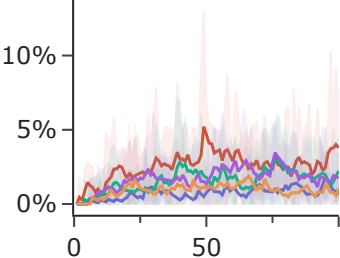

Supplement: supplementary_material [file ablation_protoss_20_vs_23_llm_winrates.pdf › source_code/graphs/ablation_protoss_20_vs_23_llm_winrates.pdf]

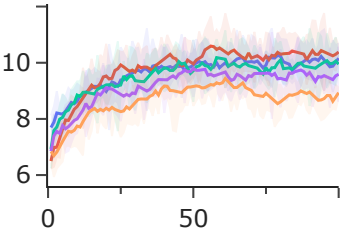

Supplement: supplementary_material [file ablation_protoss_20_vs_23_returns.pdf › source_code/graphs/ablation_protoss_20_vs_23_returns.pdf]

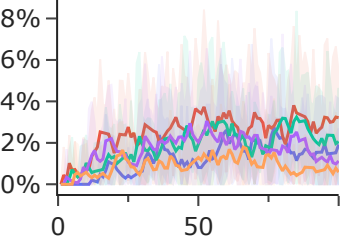

Supplement: supplementary_material [file ablation_protoss_20_vs_23_winrates.pdf › source_code/graphs/ablation_protoss_20_vs_23_winrates.pdf]

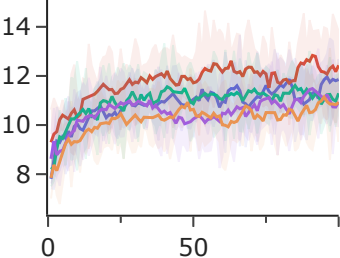

Supplement: supplementary_material [file ablation_protoss_5_vs_5_llm_returns.pdf › source_code/graphs/ablation_protoss_5_vs_5_llm_returns.pdf]

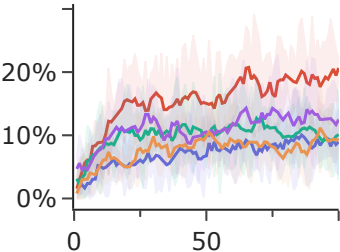

Supplement: supplementary_material [file ablation_protoss_5_vs_5_llm_winrates.pdf › source_code/graphs/ablation_protoss_5_vs_5_llm_winrates.pdf]

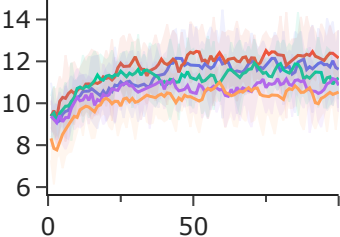

Supplement: supplementary_material [file ablation_protoss_5_vs_5_returns.pdf › source_code/graphs/ablation_protoss_5_vs_5_returns.pdf]

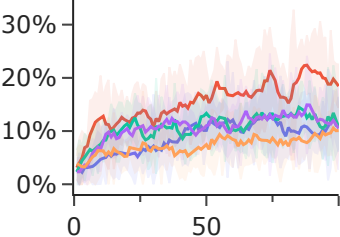

Supplement: supplementary_material [file ablation_protoss_5_vs_5_winrates.pdf › source_code/graphs/ablation_protoss_5_vs_5_winrates.pdf]

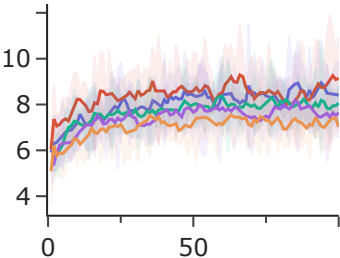

Supplement: supplementary_material [file ablation_terran_10_vs_10_llm_returns.pdf › source_code/graphs/ablation_terran_10_vs_10_llm_returns.pdf]

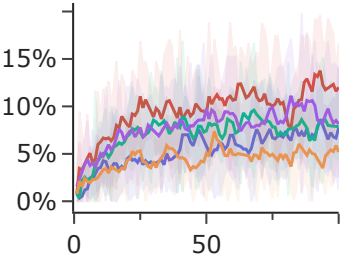

Supplement: supplementary_material [file ablation_terran_10_vs_10_llm_winrates.pdf › source_code/graphs/ablation_terran_10_vs_10_llm_winrates.pdf]

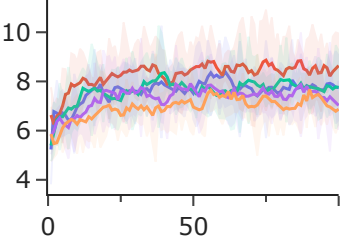

Supplement: supplementary_material [file ablation_terran_10_vs_10_returns.pdf › source_code/graphs/ablation_terran_10_vs_10_returns.pdf]

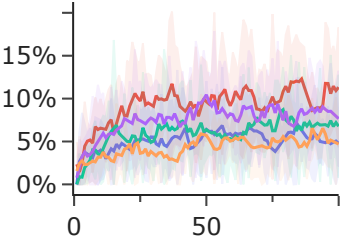

Supplement: supplementary_material [file ablation_terran_10_vs_10_winrates.pdf › source_code/graphs/ablation_terran_10_vs_10_winrates.pdf]

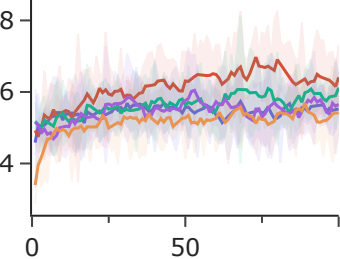

Supplement: supplementary_material [file ablation_terran_10_vs_11_llm_returns.pdf › source_code/graphs/ablation_terran_10_vs_11_llm_returns.pdf]

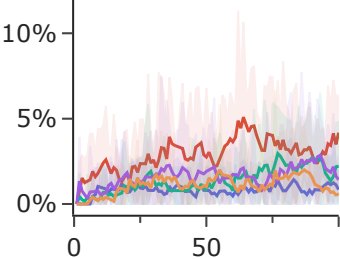

Supplement: supplementary_material [file ablation_terran_10_vs_11_llm_winrates.pdf › source_code/graphs/ablation_terran_10_vs_11_llm_winrates.pdf]

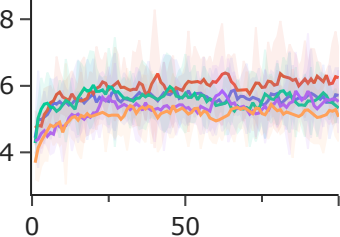

Supplement: supplementary_material [file ablation_terran_10_vs_11_returns.pdf › source_code/graphs/ablation_terran_10_vs_11_returns.pdf]

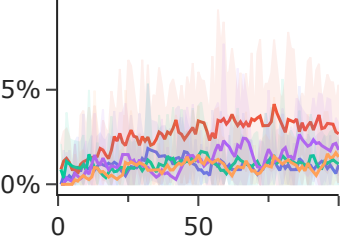

Supplement: supplementary_material [file ablation_terran_10_vs_11_winrates.pdf › source_code/graphs/ablation_terran_10_vs_11_winrates.pdf]

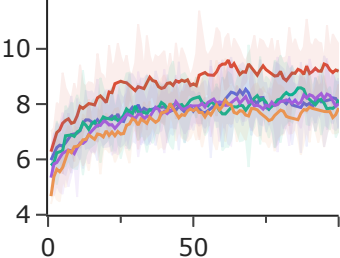

Supplement: supplementary_material [file ablation_terran_20_vs_20_llm_returns.pdf › source_code/graphs/ablation_terran_20_vs_20_llm_returns.pdf]

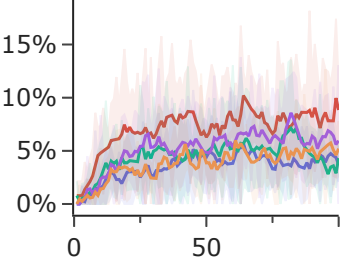

Supplement: supplementary_material [file ablation_terran_20_vs_20_llm_winrates.pdf › source_code/graphs/ablation_terran_20_vs_20_llm_winrates.pdf]

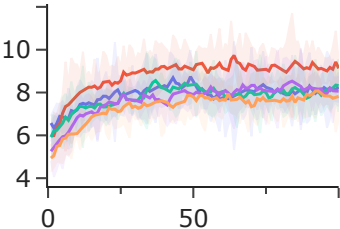

Supplement: supplementary_material [file ablation_terran_20_vs_20_returns.pdf › source_code/graphs/ablation_terran_20_vs_20_returns.pdf]

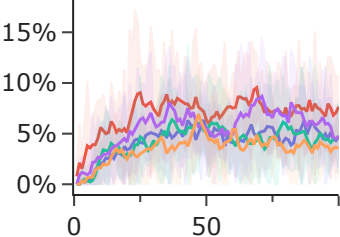

Supplement: supplementary_material [file ablation_terran_20_vs_20_winrates.pdf › source_code/graphs/ablation_terran_20_vs_20_winrates.pdf]

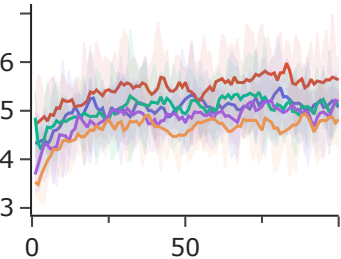

Supplement: supplementary_material [file ablation_terran_20_vs_23_llm_returns.pdf › source_code/graphs/ablation_terran_20_vs_23_llm_returns.pdf]

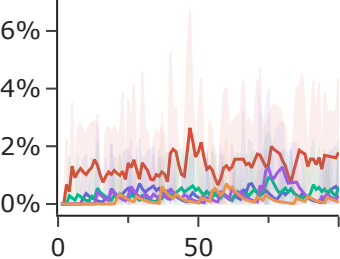

Supplement: supplementary_material [file ablation_terran_20_vs_23_llm_winrates.pdf › source_code/graphs/ablation_terran_20_vs_23_llm_winrates.pdf]

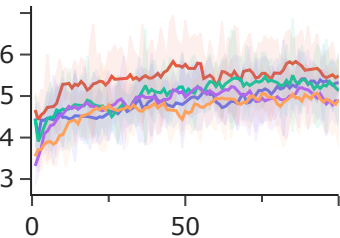

Supplement: supplementary_material [file ablation_terran_20_vs_23_returns.pdf › source_code/graphs/ablation_terran_20_vs_23_returns.pdf]

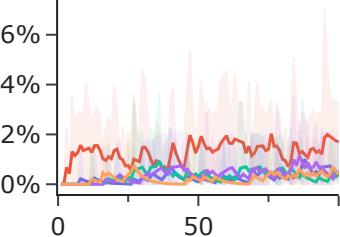

Supplement: supplementary_material [file ablation_terran_20_vs_23_winrates.pdf › source_code/graphs/ablation_terran_20_vs_23_winrates.pdf]

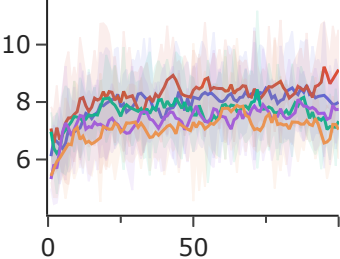

Supplement: supplementary_material [file ablation_terran_5_vs_5_llm_returns.pdf › source_code/graphs/ablation_terran_5_vs_5_llm_returns.pdf]

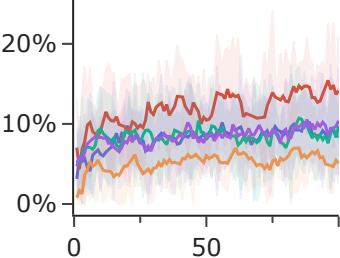

Supplement: supplementary_material [file ablation_terran_5_vs_5_llm_winrates.pdf › source_code/graphs/ablation_terran_5_vs_5_llm_winrates.pdf]

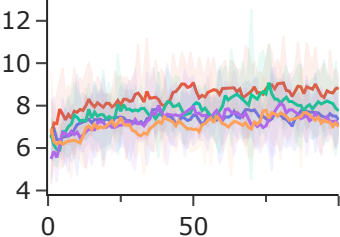

Supplement: supplementary_material [file ablation_terran_5_vs_5_returns.pdf › source_code/graphs/ablation_terran_5_vs_5_returns.pdf]

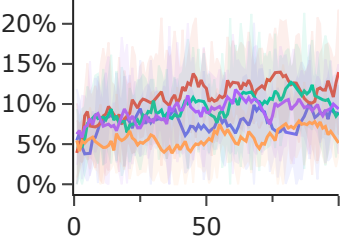

Supplement: supplementary_material [file ablation_terran_5_vs_5_winrates.pdf › source_code/graphs/ablation_terran_5_vs_5_winrates.pdf]

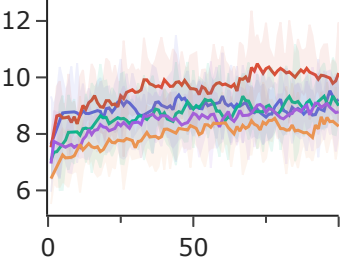

Supplement: supplementary_material [file ablation_zerg_10_vs_10_llm_returns.pdf › source_code/graphs/ablation_zerg_10_vs_10_llm_returns.pdf]

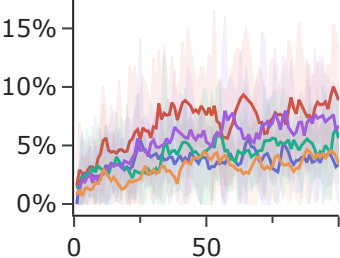

Supplement: supplementary_material [file ablation_zerg_10_vs_10_llm_winrates.pdf › source_code/graphs/ablation_zerg_10_vs_10_llm_winrates.pdf]

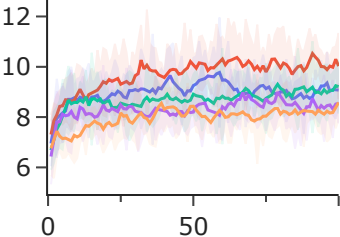

Supplement: supplementary_material [file ablation_zerg_10_vs_10_returns.pdf › source_code/graphs/ablation_zerg_10_vs_10_returns.pdf]

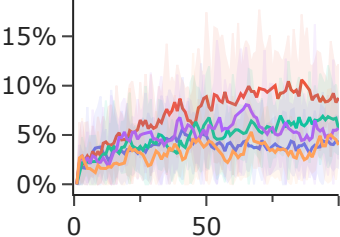

Supplement: supplementary_material [file ablation_zerg_10_vs_10_winrates.pdf › source_code/graphs/ablation_zerg_10_vs_10_winrates.pdf]

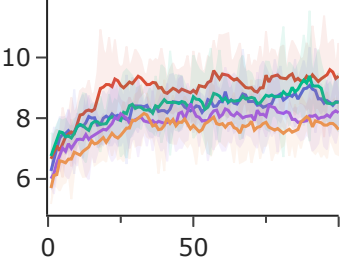

Supplement: supplementary_material [file ablation_zerg_10_vs_11_llm_returns.pdf › source_code/graphs/ablation_zerg_10_vs_11_llm_returns.pdf]

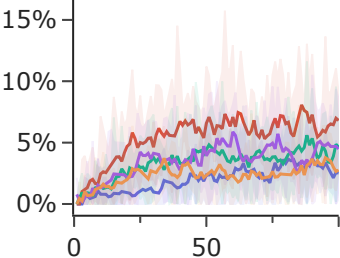

Supplement: supplementary_material [file ablation_zerg_10_vs_11_llm_winrates.pdf › source_code/graphs/ablation_zerg_10_vs_11_llm_winrates.pdf]

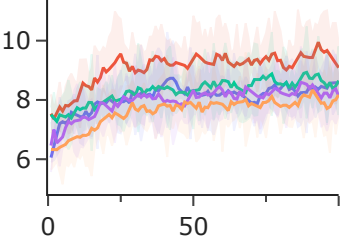

Supplement: supplementary_material [file ablation_zerg_10_vs_11_returns.pdf › source_code/graphs/ablation_zerg_10_vs_11_returns.pdf]

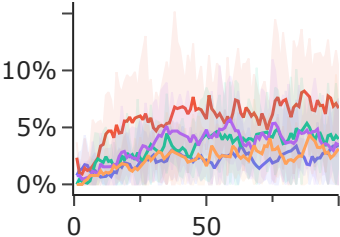

Supplement: supplementary_material [file ablation_zerg_10_vs_11_winrates.pdf › source_code/graphs/ablation_zerg_10_vs_11_winrates.pdf]

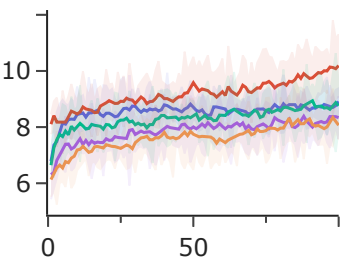

Supplement: supplementary_material [file ablation_zerg_20_vs_20_llm_returns.pdf › source_code/graphs/ablation_zerg_20_vs_20_llm_returns.pdf]

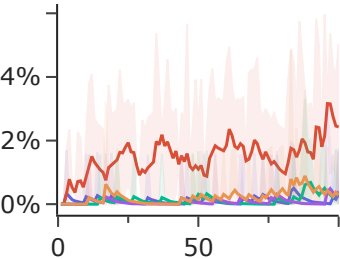

Supplement: supplementary_material [file ablation_zerg_20_vs_20_llm_winrates.pdf › source_code/graphs/ablation_zerg_20_vs_20_llm_winrates.pdf]

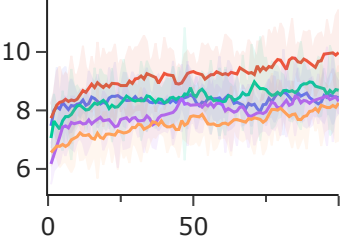

Supplement: supplementary_material [file ablation_zerg_20_vs_20_returns.pdf › source_code/graphs/ablation_zerg_20_vs_20_returns.pdf]

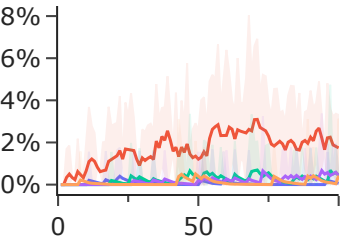

Supplement: supplementary_material [file ablation_zerg_20_vs_20_winrates.pdf › source_code/graphs/ablation_zerg_20_vs_20_winrates.pdf]

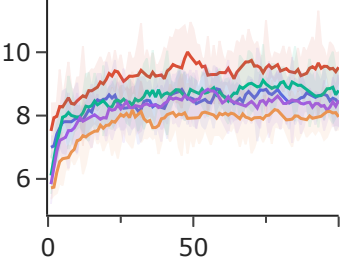

Supplement: supplementary_material [file ablation_zerg_20_vs_23_llm_returns.pdf › source_code/graphs/ablation_zerg_20_vs_23_llm_returns.pdf]

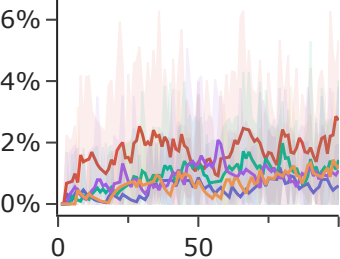

Supplement: supplementary_material [file ablation_zerg_20_vs_23_llm_winrates.pdf › source_code/graphs/ablation_zerg_20_vs_23_llm_winrates.pdf]

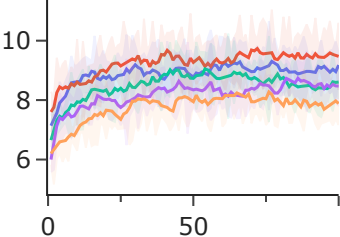

Supplement: supplementary_material [file ablation_zerg_20_vs_23_returns.pdf › source_code/graphs/ablation_zerg_20_vs_23_returns.pdf]

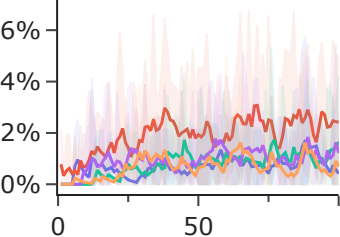

Supplement: supplementary_material [file ablation_zerg_20_vs_23_winrates.pdf › source_code/graphs/ablation_zerg_20_vs_23_winrates.pdf]

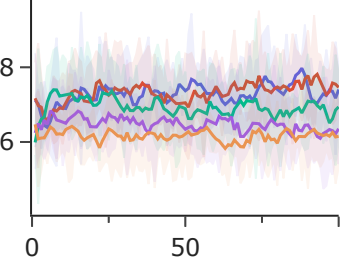

Supplement: supplementary_material [file ablation_zerg_5_vs_5_llm_returns.pdf › source_code/graphs/ablation_zerg_5_vs_5_llm_returns.pdf]

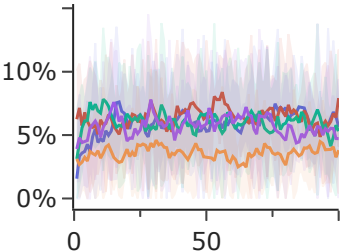

Supplement: supplementary_material [file ablation_zerg_5_vs_5_llm_winrates.pdf › source_code/graphs/ablation_zerg_5_vs_5_llm_winrates.pdf]

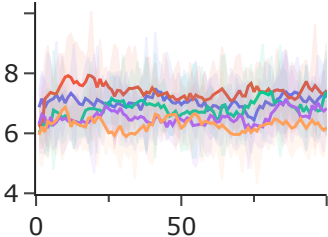

Supplement: supplementary_material [file ablation_zerg_5_vs_5_returns.pdf › source_code/graphs/ablation_zerg_5_vs_5_returns.pdf]

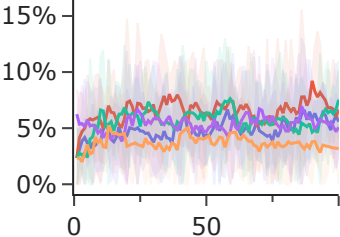

Supplement: supplementary_material [file ablation_zerg_5_vs_5_winrates.pdf › source_code/graphs/ablation_zerg_5_vs_5_winrates.pdf]

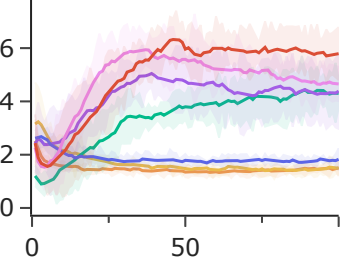

Supplement: supplementary_material [file corridor_llm_returns.pdf › source_code/graphs/corridor_llm_returns.pdf]

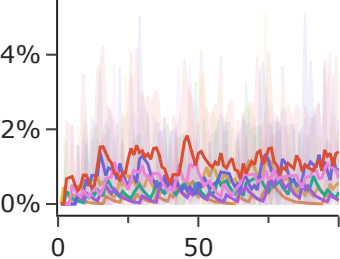

Supplement: supplementary_material [file corridor_llm_winrates.pdf › source_code/graphs/corridor_llm_winrates.pdf]

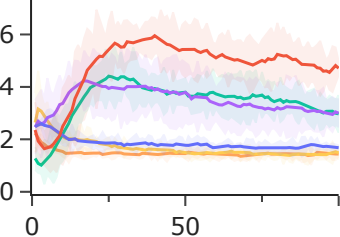

Supplement: supplementary_material [file corridor_returns.pdf › source_code/graphs/corridor_returns.pdf]

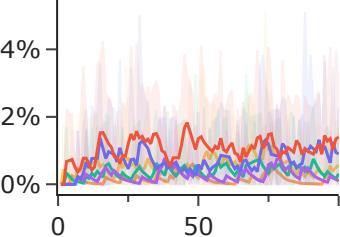

Supplement: supplementary_material [file corridor_winrates.pdf › source_code/graphs/corridor_winrates.pdf]

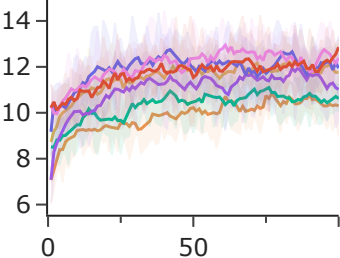

Supplement: supplementary_material [file protoss_10_vs_10_llm_returns.pdf › source_code/graphs/protoss_10_vs_10_llm_returns.pdf]

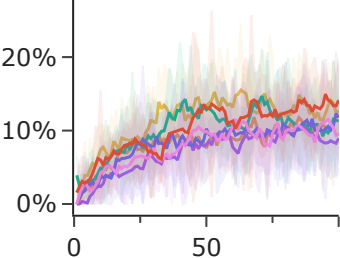

Supplement: supplementary_material [file protoss_10_vs_10_llm_winrates.pdf › source_code/graphs/protoss_10_vs_10_llm_winrates.pdf]

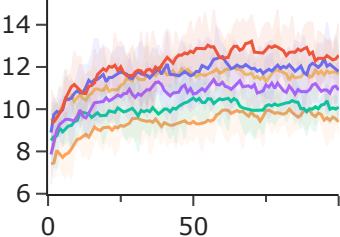

Supplement: supplementary_material [file protoss_10_vs_10_returns.pdf › source_code/graphs/protoss_10_vs_10_returns.pdf]

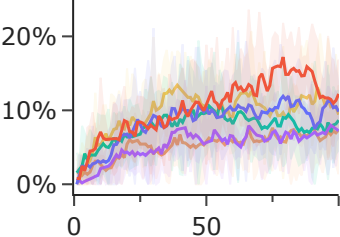

Supplement: supplementary_material [file protoss_10_vs_10_winrates.pdf › source_code/graphs/protoss_10_vs_10_winrates.pdf]
