# Supplementary material (part 2 of 2)
Source: ML conference proceedings conference paper supplement (https://openreview.net/forum?id=krG6UHAvYr)

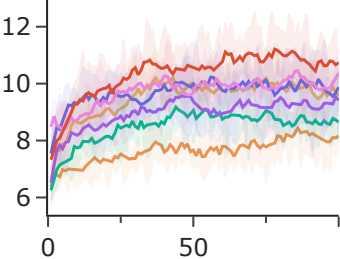

Supplement: supplementary_material [file protoss_10_vs_11_llm_returns.pdf › source_code/graphs/protoss_10_vs_11_llm_returns.pdf]

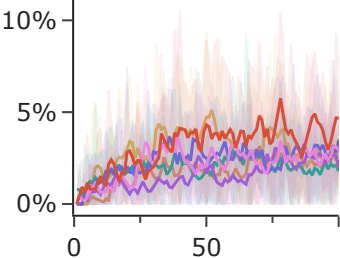

Supplement: supplementary_material [file protoss_10_vs_11_llm_winrates.pdf › source_code/graphs/protoss_10_vs_11_llm_winrates.pdf]

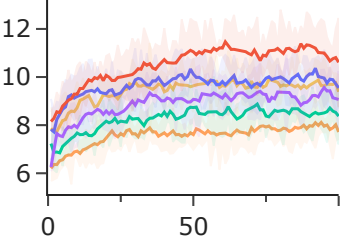

Supplement: supplementary_material [file protoss_10_vs_11_returns.pdf › source_code/graphs/protoss_10_vs_11_returns.pdf]

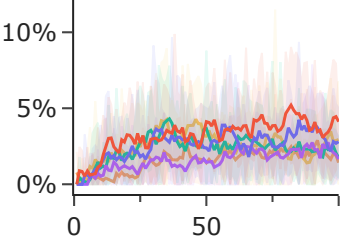

Supplement: supplementary_material [file protoss_10_vs_11_winrates.pdf › source_code/graphs/protoss_10_vs_11_winrates.pdf]

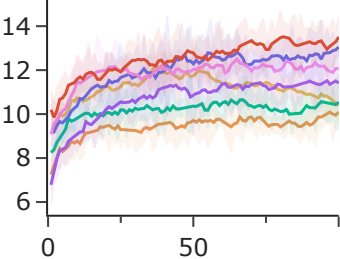

Supplement: supplementary_material [file protoss_20_vs_20_llm_returns.pdf › source_code/graphs/protoss_20_vs_20_llm_returns.pdf]

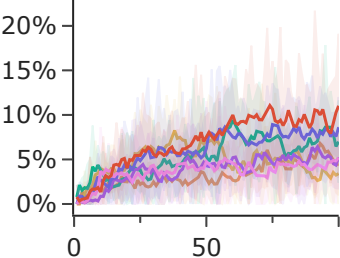

Supplement: supplementary_material [file protoss_20_vs_20_llm_winrates.pdf › source_code/graphs/protoss_20_vs_20_llm_winrates.pdf]

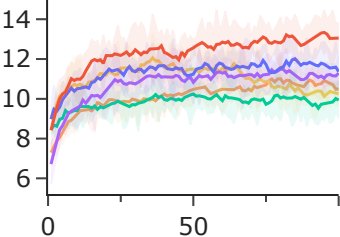

Supplement: supplementary_material [file protoss_20_vs_20_returns.pdf › source_code/graphs/protoss_20_vs_20_returns.pdf]

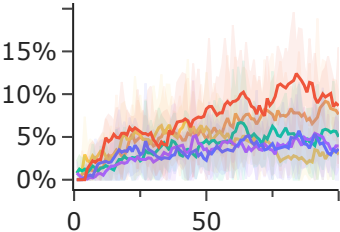

Supplement: supplementary_material [file protoss_20_vs_20_winrates.pdf › source_code/graphs/protoss_20_vs_20_winrates.pdf]

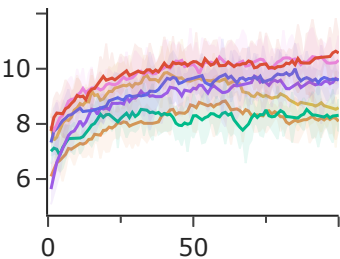

Supplement: supplementary_material [file protoss_20_vs_23_llm_returns.pdf › source_code/graphs/protoss_20_vs_23_llm_returns.pdf]

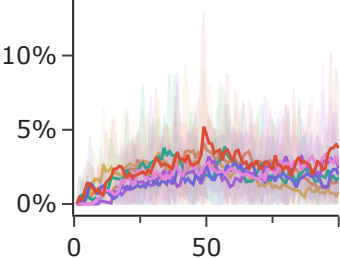

Supplement: supplementary_material [file protoss_20_vs_23_llm_winrates.pdf › source_code/graphs/protoss_20_vs_23_llm_winrates.pdf]

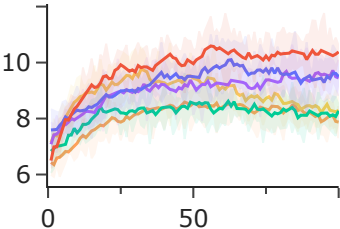

Supplement: supplementary_material [file protoss_20_vs_23_returns.pdf › source_code/graphs/protoss_20_vs_23_returns.pdf]

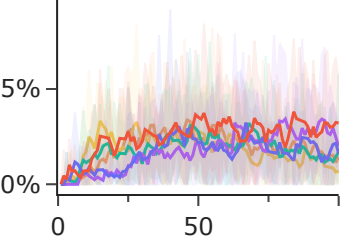

Supplement: supplementary_material [file protoss_20_vs_23_winrates.pdf › source_code/graphs/protoss_20_vs_23_winrates.pdf]

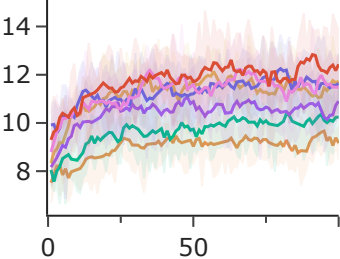

Supplement: supplementary_material [file protoss_5_vs_5_llm_returns.pdf › source_code/graphs/protoss_5_vs_5_llm_returns.pdf]

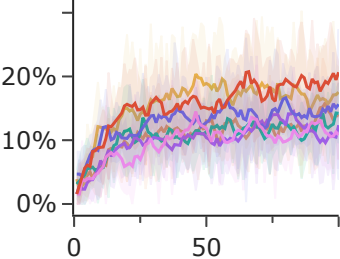

Supplement: supplementary_material [file protoss_5_vs_5_llm_winrates.pdf › source_code/graphs/protoss_5_vs_5_llm_winrates.pdf]

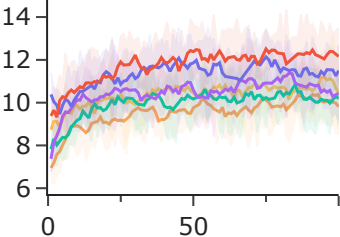

Supplement: supplementary_material [file protoss_5_vs_5_returns.pdf › source_code/graphs/protoss_5_vs_5_returns.pdf]

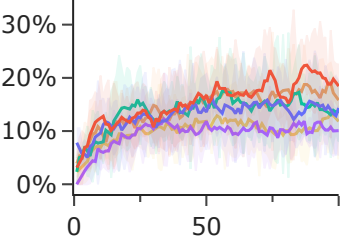

Supplement: supplementary_material [file protoss_5_vs_5_winrates.pdf › source_code/graphs/protoss_5_vs_5_winrates.pdf]

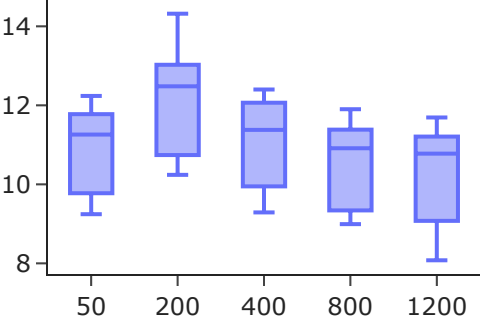

Supplement: supplementary_material [file protoss_llm_returns_box.pdf › source_code/graphs/protoss_llm_returns_box.pdf]

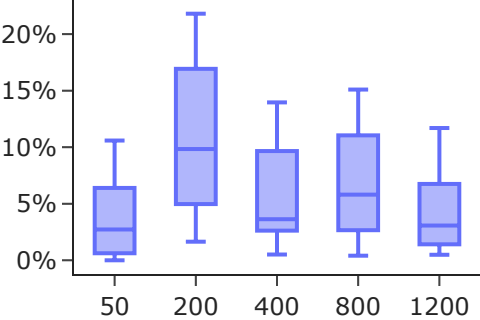

Supplement: supplementary_material [file protoss_llm_winrates_box.pdf › source_code/graphs/protoss_llm_winrates_box.pdf]

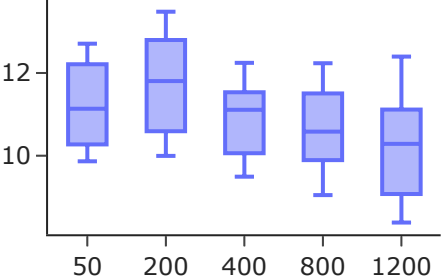

Supplement: supplementary_material [file protoss_returns_box.pdf › source_code/graphs/protoss_returns_box.pdf]

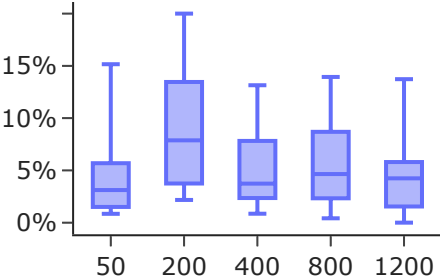

Supplement: supplementary_material [file protoss_winrates_box.pdf › source_code/graphs/protoss_winrates_box.pdf]

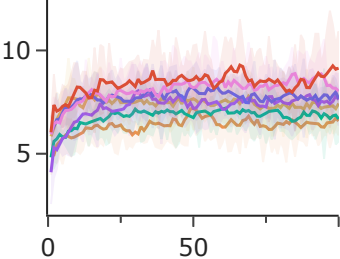

Supplement: supplementary_material [file terran_10_vs_10_llm_returns.pdf › source_code/graphs/terran_10_vs_10_llm_returns.pdf]

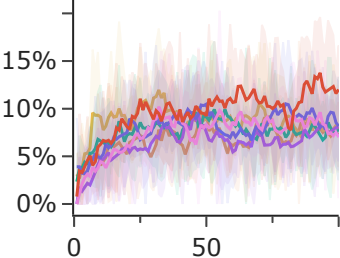

Supplement: supplementary_material [file terran_10_vs_10_llm_winrates.pdf › source_code/graphs/terran_10_vs_10_llm_winrates.pdf]

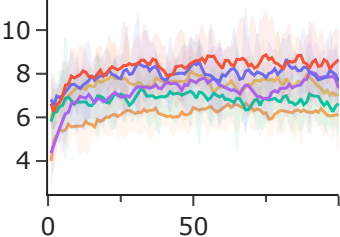

Supplement: supplementary_material [file terran_10_vs_10_returns.pdf › source_code/graphs/terran_10_vs_10_returns.pdf]

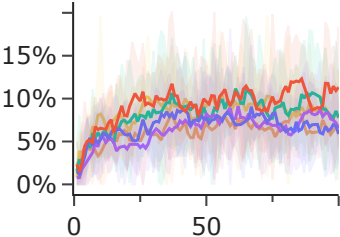

Supplement: supplementary_material [file terran_10_vs_10_winrates.pdf › source_code/graphs/terran_10_vs_10_winrates.pdf]

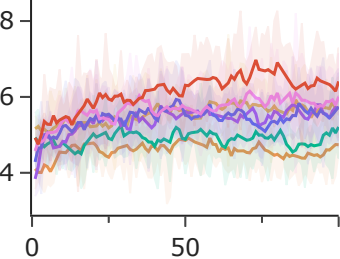

Supplement: supplementary_material [file terran_10_vs_11_llm_returns.pdf › source_code/graphs/terran_10_vs_11_llm_returns.pdf]

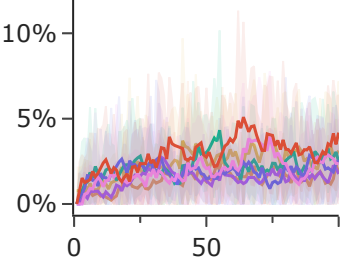

Supplement: supplementary_material [file terran_10_vs_11_llm_winrates.pdf › source_code/graphs/terran_10_vs_11_llm_winrates.pdf]

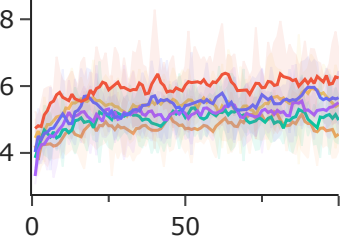

Supplement: supplementary_material [file terran_10_vs_11_returns.pdf › source_code/graphs/terran_10_vs_11_returns.pdf]

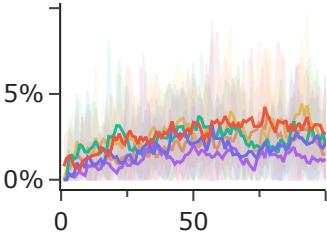

Supplement: supplementary_material [file terran_10_vs_11_winrates.pdf › source_code/graphs/terran_10_vs_11_winrates.pdf]

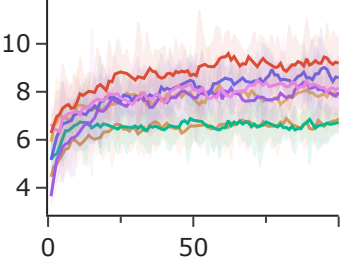

Supplement: supplementary_material [file terran_20_vs_20_llm_returns.pdf › source_code/graphs/terran_20_vs_20_llm_returns.pdf]

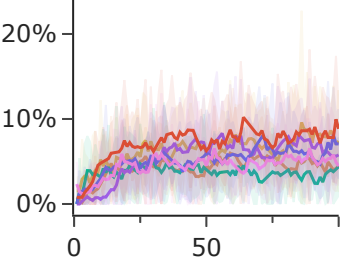

Supplement: supplementary_material [file terran_20_vs_20_llm_winrates.pdf › source_code/graphs/terran_20_vs_20_llm_winrates.pdf]

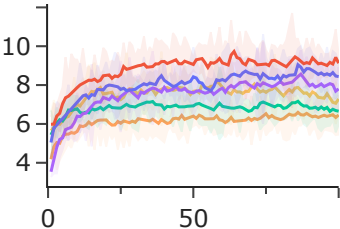

Supplement: supplementary_material [file terran_20_vs_20_returns.pdf › source_code/graphs/terran_20_vs_20_returns.pdf]

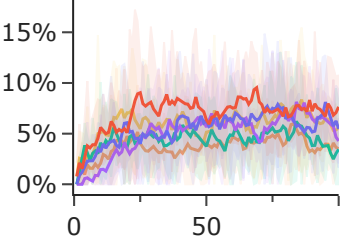

Supplement: supplementary_material [file terran_20_vs_20_winrates.pdf › source_code/graphs/terran_20_vs_20_winrates.pdf]

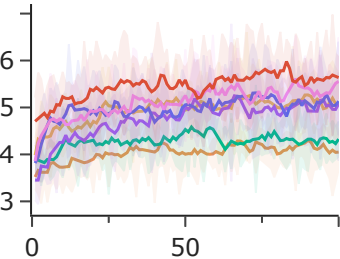

Supplement: supplementary_material [file terran_20_vs_23_llm_returns.pdf › source_code/graphs/terran_20_vs_23_llm_returns.pdf]

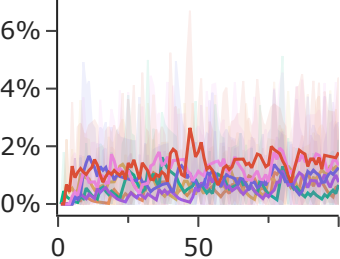

Supplement: supplementary_material [file terran_20_vs_23_llm_winrates.pdf › source_code/graphs/terran_20_vs_23_llm_winrates.pdf]

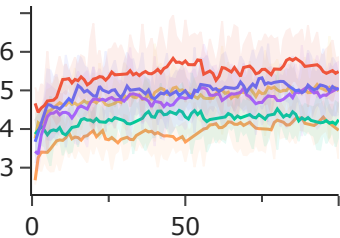

Supplement: supplementary_material [file terran_20_vs_23_returns.pdf › source_code/graphs/terran_20_vs_23_returns.pdf]

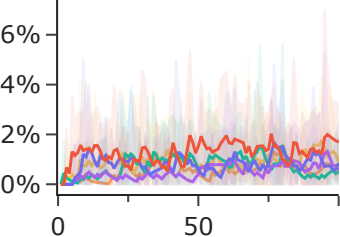

Supplement: supplementary_material [file terran_20_vs_23_winrates.pdf › source_code/graphs/terran_20_vs_23_winrates.pdf]

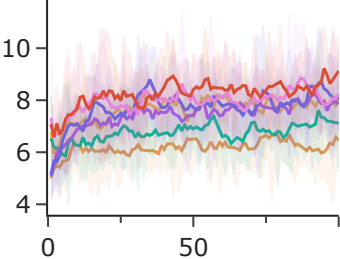

Supplement: supplementary_material [file terran_5_vs_5_llm_returns.pdf › source_code/graphs/terran_5_vs_5_llm_returns.pdf]

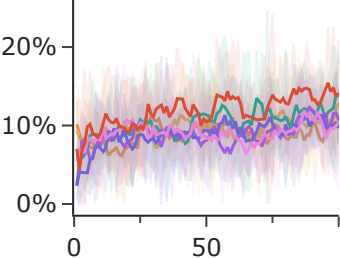

Supplement: supplementary_material [file terran_5_vs_5_llm_winrates.pdf › source_code/graphs/terran_5_vs_5_llm_winrates.pdf]

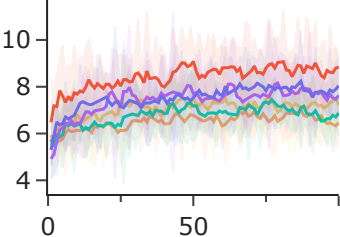

Supplement: supplementary_material [file terran_5_vs_5_returns.pdf › source_code/graphs/terran_5_vs_5_returns.pdf]

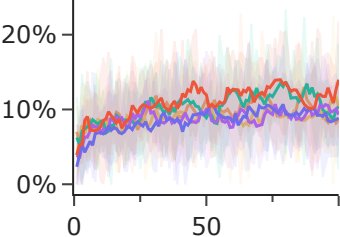

Supplement: supplementary_material [file terran_5_vs_5_winrates.pdf › source_code/graphs/terran_5_vs_5_winrates.pdf]

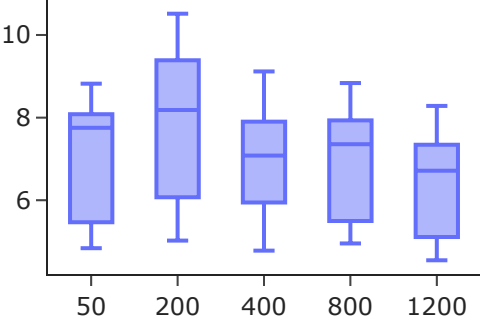

Supplement: supplementary_material [file terran_llm_returns_box.pdf › source_code/graphs/terran_llm_returns_box.pdf]

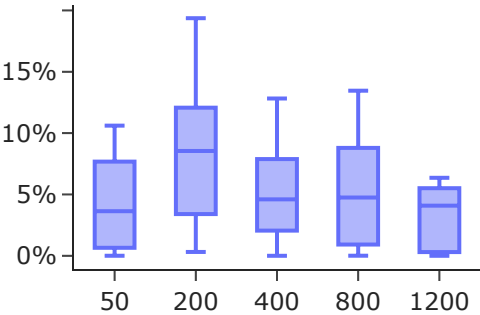

Supplement: supplementary_material [file terran_llm_winrates_box.pdf › source_code/graphs/terran_llm_winrates_box.pdf]

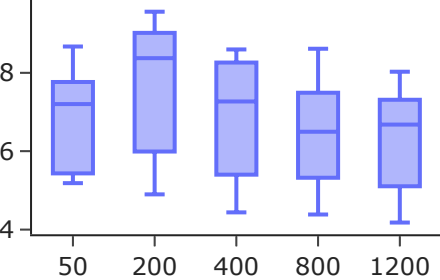

Supplement: supplementary_material [file terran_returns_box.pdf › source_code/graphs/terran_returns_box.pdf]

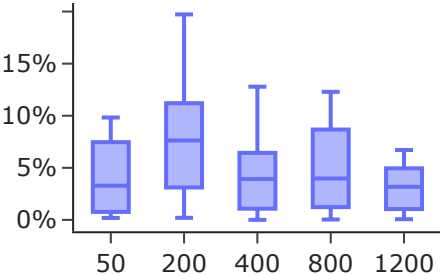

Supplement: supplementary_material [file terran_winrates_box.pdf › source_code/graphs/terran_winrates_box.pdf]

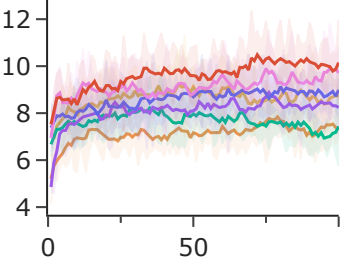

Supplement: supplementary_material [file zerg_10_vs_10_llm_returns.pdf › source_code/graphs/zerg_10_vs_10_llm_returns.pdf]

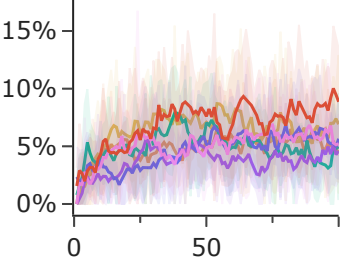

Supplement: supplementary_material [file zerg_10_vs_10_llm_winrates.pdf › source_code/graphs/zerg_10_vs_10_llm_winrates.pdf]

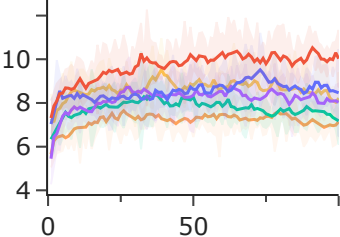

Supplement: supplementary_material [file zerg_10_vs_10_returns.pdf › source_code/graphs/zerg_10_vs_10_returns.pdf]

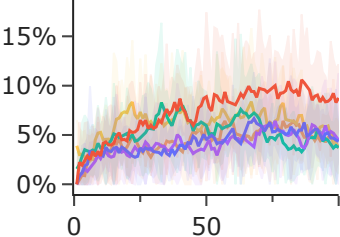

Supplement: supplementary_material [file zerg_10_vs_10_winrates.pdf › source_code/graphs/zerg_10_vs_10_winrates.pdf]

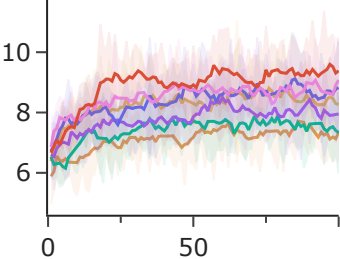

Supplement: supplementary_material [file zerg_10_vs_11_llm_returns.pdf › source_code/graphs/zerg_10_vs_11_llm_returns.pdf]

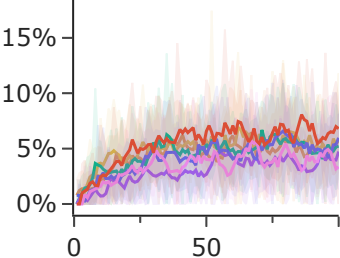

Supplement: supplementary_material [file zerg_10_vs_11_llm_winrates.pdf › source_code/graphs/zerg_10_vs_11_llm_winrates.pdf]

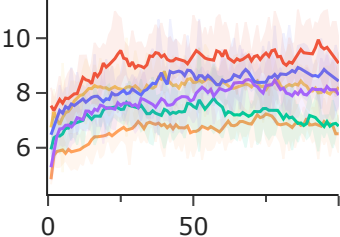

Supplement: supplementary_material [file zerg_10_vs_11_returns.pdf › source_code/graphs/zerg_10_vs_11_returns.pdf]

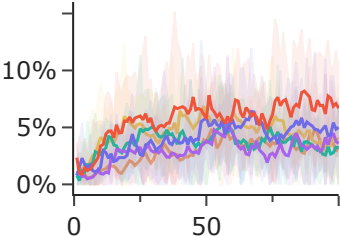

Supplement: supplementary_material [file zerg_10_vs_11_winrates.pdf › source_code/graphs/zerg_10_vs_11_winrates.pdf]

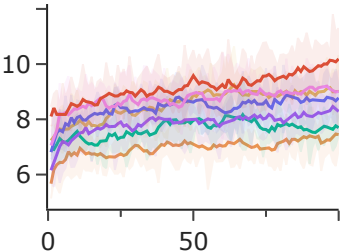

Supplement: supplementary_material [file zerg_20_vs_20_llm_returns.pdf › source_code/graphs/zerg_20_vs_20_llm_returns.pdf]

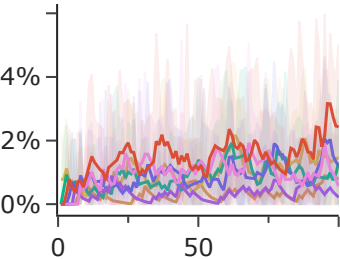

Supplement: supplementary_material [file zerg_20_vs_20_llm_winrates.pdf › source_code/graphs/zerg_20_vs_20_llm_winrates.pdf]

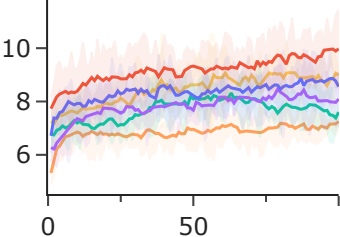

Supplement: supplementary_material [file zerg_20_vs_20_returns.pdf › source_code/graphs/zerg_20_vs_20_returns.pdf]

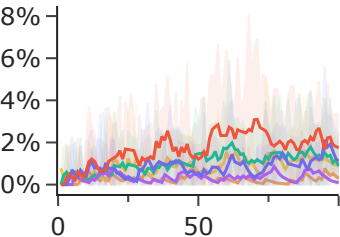

Supplement: supplementary_material [file zerg_20_vs_20_winrates.pdf › source_code/graphs/zerg_20_vs_20_winrates.pdf]

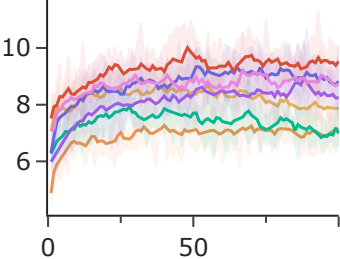

Supplement: supplementary_material [file zerg_20_vs_23_llm_returns.pdf › source_code/graphs/zerg_20_vs_23_llm_returns.pdf]

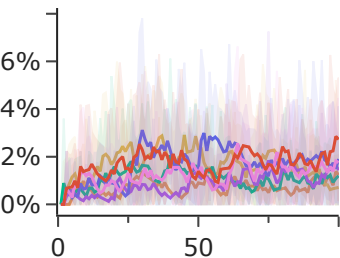

Supplement: supplementary_material [file zerg_20_vs_23_llm_winrates.pdf › source_code/graphs/zerg_20_vs_23_llm_winrates.pdf]

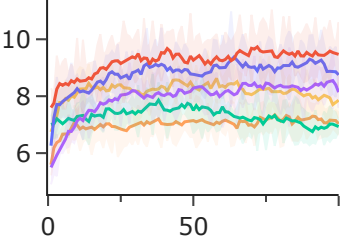

Supplement: supplementary_material [file zerg_20_vs_23_returns.pdf › source_code/graphs/zerg_20_vs_23_returns.pdf]

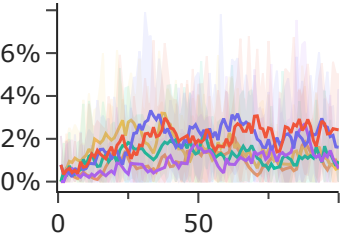

Supplement: supplementary_material [file zerg_20_vs_23_winrates.pdf › source_code/graphs/zerg_20_vs_23_winrates.pdf]

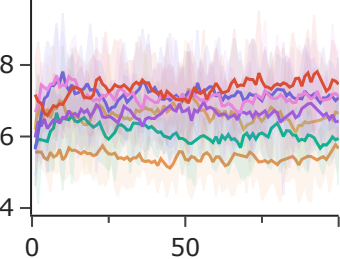

Supplement: supplementary_material [file zerg_5_vs_5_llm_returns.pdf › source_code/graphs/zerg_5_vs_5_llm_returns.pdf]

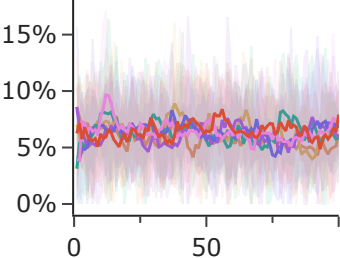

Supplement: supplementary_material [file zerg_5_vs_5_llm_winrates.pdf › source_code/graphs/zerg_5_vs_5_llm_winrates.pdf]

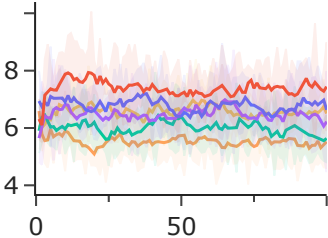

Supplement: supplementary_material [file zerg_5_vs_5_returns.pdf › source_code/graphs/zerg_5_vs_5_returns.pdf]

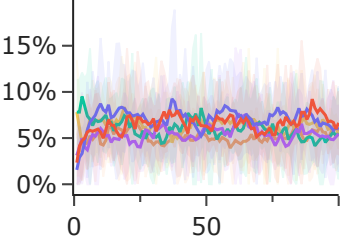

Supplement: supplementary_material [file zerg_5_vs_5_winrates.pdf › source_code/graphs/zerg_5_vs_5_winrates.pdf]

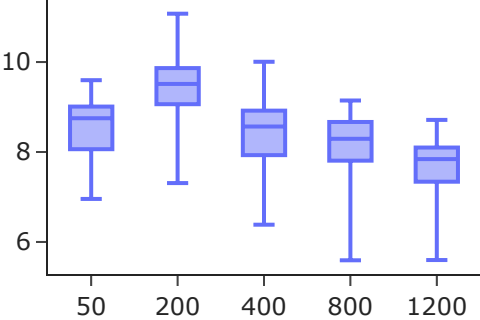

Supplement: supplementary_material [file zerg_llm_returns_box.pdf › source_code/graphs/zerg_llm_returns_box.pdf]

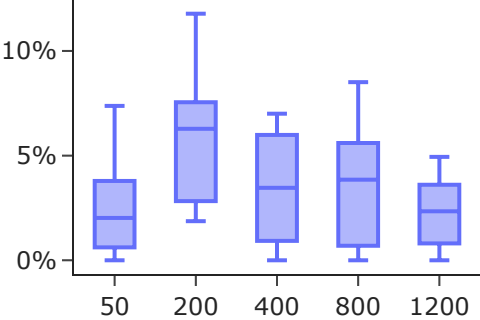

Supplement: supplementary_material [file zerg_llm_winrates_box.pdf › source_code/graphs/zerg_llm_winrates_box.pdf]

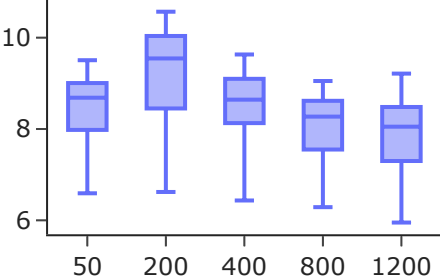

Supplement: supplementary_material [file zerg_returns_box.pdf › source_code/graphs/zerg_returns_box.pdf]

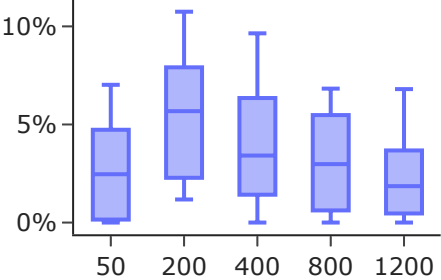

Supplement: supplementary_material [file zerg_winrates_box.pdf › source_code/graphs/zerg_winrates_box.pdf]
